# Supplementary material for: Ruthenium(ii)-catalyzed chemoselective deacylative annulation of 1,3-diones with sulfoxonium ylides via C–C bond activation
Source: PubMed Central journal article supplement (PMC6889838; doi:10.1039/c9sc03245b), 2019-08-12

# **Ruthenium(II)-catalyzed chemoselective deacylative annulation of 1,3-diones with sulfoxonium ylides *via* C–C bond activation**

Si Wen, Weiwei Lv, Dan Ba, Jing Liu, and Guolin Cheng\*

College of Materials Science & Engineering, Huaqiao University, Xiamen 361021, China.

E-mail: glcheng@hqu.edu.cn

## **Table of Contents**

|                                                        |     |
|--------------------------------------------------------|-----|
| <b>1. General Information</b>                          | S2  |
| <b>2. Experimental Section</b>                         | S3  |
| <b>2.1 Optimization of the Reaction Conditions</b>     | S3  |
| <b>2.2 Procedure for the Synthesis of 2</b>            | S6  |
| <b>2.3 Procedure for the Synthesis of 3</b>            | S7  |
| <b>3. Procedure for Gram-Scale Experiment of 3aa</b>   | S21 |
| <b>4. Procedure for Gram-Scale Experiment of 3ad</b>   | S22 |
| <b>5. X-Ray Crystallographic Data of 3ak</b>           | S23 |
| <b>6. <sup>1</sup>H and <sup>13</sup>C NMR Spectra</b> | S25 |

## 1. General Information

All the solvents were used without further purification. the other commercial chemicals were used without further purification. All reactions were performed under an inert atmosphere of nitrogen in flame-dried glassware, unless otherwise stated. Analytical thin-layer chromatography was performed on 0.25 mm silica gel, 60-F254. Visualization was carried out with UV light and Vogel's permanganate. Preparative TLC was performed on 1.0 mm silica gel.  $^1\text{H}$  NMR spectra were recorded on a Bruker DRX-500 instrument (500 MHz).  $^{13}\text{C}$  NMR spectra were recorded on a Bruker DRX-500 instrument (126 MHz) and were fully decoupled by broad band proton decoupling. High-resolution mass spectra (HRMS) were recorded on an Agilent 1290 mass spectrometer using ESI-TOF (electrospray ionization time-of-flight). NMR spectra were recorded in  $\text{CDCl}_3$ .  $^1\text{H}$  NMR spectra were referenced to residual  $\text{CHCl}_3$  at 7.26 ppm, and  $^{13}\text{C}$  NMR spectra were referenced to the central peak of  $\text{CDCl}_3$  at 77.0 ppm. Chemical shifts ( $\delta$ ) are reported in ppm, and coupling constants ( $J$ ) are reported in hertz (Hz). Multiplicities are reported using the following abbreviations: s = singlet, d = doublet, t = triplet, q = quartet, m = multiplet.

## 2. Experimental Section

### 2.1 Optimization of the Reaction Conditions

#### 2.1.1 Table S1 Optimization of the Reaction Conditions<sup>a</sup>

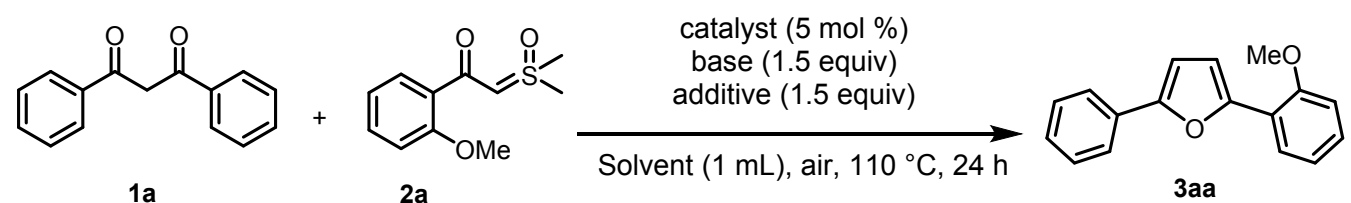

| Entry | Catalyst                                             | Solvent            | Base                             | Additive             | Yield (%) <sup>b</sup> |
|-------|------------------------------------------------------|--------------------|----------------------------------|----------------------|------------------------|
| 1     | [RuCl <sub>2</sub> ( <i>p</i> -cymene)] <sub>2</sub> | HFIP               | Na <sub>3</sub> PO <sub>4</sub>  | MesCO <sub>2</sub> H | 23                     |
| 2     | [RuCl <sub>2</sub> ( <i>p</i> -cymene)] <sub>2</sub> | DCE                | Na <sub>3</sub> PO <sub>4</sub>  | MesCO <sub>2</sub> H | 15                     |
| 3     | [RuCl <sub>2</sub> ( <i>p</i> -cymene)] <sub>2</sub> | <i>i</i> PrOH      | Na <sub>3</sub> PO <sub>4</sub>  | MesCO <sub>2</sub> H | 26                     |
| 4     | [RuCl <sub>2</sub> ( <i>p</i> -cymene)] <sub>2</sub> | DMF                | Na <sub>3</sub> PO <sub>4</sub>  | MesCO <sub>2</sub> H | 30                     |
| 5     | [RuCl <sub>2</sub> ( <i>p</i> -cymene)] <sub>2</sub> | CH <sub>3</sub> CN | Na <sub>3</sub> PO <sub>4</sub>  | MesCO <sub>2</sub> H | 25                     |
| 6     | [RuCl <sub>2</sub> ( <i>p</i> -cymene)] <sub>2</sub> | toluene            | Na <sub>3</sub> PO <sub>4</sub>  | MesCO <sub>2</sub> H | 35                     |
| 7     | [RuCl <sub>2</sub> ( <i>p</i> -cymene)] <sub>2</sub> | toluene            | NaHCO <sub>3</sub>               | MesCO <sub>2</sub> H | 24                     |
| 8     | [RuCl <sub>2</sub> ( <i>p</i> -cymene)] <sub>2</sub> | toluene            | K <sub>2</sub> CO <sub>3</sub>   | MesCO <sub>2</sub> H | 20                     |
| 9     | [RuCl <sub>2</sub> ( <i>p</i> -cymene)] <sub>2</sub> | toluene            | KHCO <sub>3</sub>                | MesCO <sub>2</sub> H | 22                     |
| 10    | [RuCl <sub>2</sub> ( <i>p</i> -cymene)] <sub>2</sub> | toluene            | Cs <sub>2</sub> CO <sub>3</sub>  | MesCO <sub>2</sub> H | 25                     |
| 11    | [RuCl <sub>2</sub> ( <i>p</i> -cymene)] <sub>2</sub> | toluene            | NaOAc                            | MesCO <sub>2</sub> H | 30                     |
| 12    | [RuCl <sub>2</sub> ( <i>p</i> -cymene)] <sub>2</sub> | toluene            | NaOH                             | MesCO <sub>2</sub> H | 26                     |
| 13    | [RuCl <sub>2</sub> ( <i>p</i> -cymene)] <sub>2</sub> | toluene            | KOAc                             | MesCO <sub>2</sub> H | 15                     |
| 14    | [RuCl <sub>2</sub> ( <i>p</i> -cymene)] <sub>2</sub> | toluene            | KOH                              | MesCO <sub>2</sub> H | 15                     |
| 15    | [RuCl <sub>2</sub> ( <i>p</i> -cymene)] <sub>2</sub> | toluene            | K <sub>2</sub> HPO <sub>4</sub>  | MesCO <sub>2</sub> H | 52                     |
| 16    | [RuCl <sub>2</sub> ( <i>p</i> -cymene)] <sub>2</sub> | toluene            | K <sub>3</sub> PO <sub>4</sub>   | MesCO <sub>2</sub> H | 15                     |
| 17    | [RuCl <sub>2</sub> ( <i>p</i> -cymene)] <sub>2</sub> | toluene            | KH <sub>2</sub> PO <sub>4</sub>  | MesCO <sub>2</sub> H | 40                     |
| 18    | [RuCl <sub>2</sub> ( <i>p</i> -cymene)] <sub>2</sub> | toluene            | HCOONa                           | MesCO <sub>2</sub> H | 25                     |
| 19    | [RuCl <sub>2</sub> ( <i>p</i> -cymene)] <sub>2</sub> | toluene            | CH <sub>3</sub> ONa              | MesCO <sub>2</sub> H | 25                     |
| 20    | [RuCl <sub>2</sub> ( <i>p</i> -cymene)] <sub>2</sub> | toluene            | Na <sub>2</sub> CO <sub>3</sub>  | MesCO <sub>2</sub> H | 30                     |
| 21    | [RuCl <sub>2</sub> ( <i>p</i> -cymene)] <sub>2</sub> | toluene            | NaH <sub>2</sub> PO <sub>4</sub> | MesCO <sub>2</sub> H | 25                     |
| 22    | [RuCl <sub>2</sub> ( <i>p</i> -cymene)] <sub>2</sub> | toluene            | <sup>t</sup> BuOK                | MesCO <sub>2</sub> H | 10                     |
| 23    | [RuCl <sub>2</sub> ( <i>p</i> -cymene)] <sub>2</sub> | toluene            | <sup>t</sup> BuONa               | MesCO <sub>2</sub> H | 20                     |

|                 |                                                      |                    |                                 |                      |       |
|-----------------|------------------------------------------------------|--------------------|---------------------------------|----------------------|-------|
| 24              | [RuCl <sub>2</sub> ( <i>p</i> -cymene)] <sub>2</sub> | toluene            | LiOH                            | MesCO <sub>2</sub> H | 15    |
| 25              | [RuCl <sub>2</sub> ( <i>p</i> -cymene)] <sub>2</sub> | toluene            | CH <sub>3</sub> OK              | MesCO <sub>2</sub> H | 10    |
| 26              | [RuCl <sub>2</sub> ( <i>p</i> -cymene)] <sub>2</sub> | toluene            | Li <sub>2</sub> CO <sub>3</sub> | MesCO <sub>2</sub> H | 10    |
| 27              | [RuCl <sub>2</sub> ( <i>p</i> -cymene)] <sub>2</sub> | toluene            | CsOAc                           | MesCO <sub>2</sub> H | 12    |
| 28              | [RuCl <sub>2</sub> ( <i>p</i> -cymene)] <sub>2</sub> | toluene            | <sup>t</sup> BuOLi              | MesCO <sub>2</sub> H | 72    |
| 29              | [RuCl <sub>2</sub> ( <i>p</i> -cymene)] <sub>2</sub> | toluene            | -                               | MesCO <sub>2</sub> H | 10    |
| 30              | [RuCl <sub>2</sub> ( <i>p</i> -cymene)] <sub>2</sub> | toluene            | <sup>t</sup> BuOLi              | -                    | trace |
| 31              | [RuCl <sub>2</sub> ( <i>p</i> -cymene)] <sub>2</sub> | toluene            | <sup>t</sup> BuOLi              | AcOH                 | 20    |
| 32              | [RuCl <sub>2</sub> ( <i>p</i> -cymene)] <sub>2</sub> | toluene            | <sup>t</sup> BuOLi              | Ac-Gly-OH            | 10    |
| 33              | [RuCl <sub>2</sub> ( <i>p</i> -cymene)] <sub>2</sub> | toluene            | <sup>t</sup> BuOLi              | Val-Boc-OH           | 10    |
| 34              | [RuCl <sub>2</sub> ( <i>p</i> -cymene)] <sub>2</sub> | toluene            | MesCO <sub>2</sub> Li           | -                    | 71    |
| 35              | [RuCl <sub>2</sub> ( <i>p</i> -cymene)] <sub>2</sub> | DCE                | MesCO <sub>2</sub> Li           | -                    | 20    |
| 36              | [RuCl <sub>2</sub> ( <i>p</i> -cymene)] <sub>2</sub> | NMP                | MesCO <sub>2</sub> Li           | -                    | trace |
| 37              | [RuCl <sub>2</sub> ( <i>p</i> -cymene)] <sub>2</sub> | 1,4-dioxane        | MesCO <sub>2</sub> Li           | -                    | 20    |
| 38              | [RuCl <sub>2</sub> ( <i>p</i> -cymene)] <sub>2</sub> | THF                | MesCO <sub>2</sub> Li           | -                    | 58    |
| 39              | [RuCl <sub>2</sub> ( <i>p</i> -cymene)] <sub>2</sub> | HFIP               | MesCO <sub>2</sub> Li           | -                    | 10    |
| 40              | [RuCl <sub>2</sub> ( <i>p</i> -cymene)] <sub>2</sub> | <sup>t</sup> AmOH  | MesCO <sub>2</sub> Li           | -                    | 15    |
| 41              | [RuCl <sub>2</sub> ( <i>p</i> -cymene)] <sub>2</sub> | DME                | MesCO <sub>2</sub> Li           | -                    | 62    |
| 42              | [RuCl <sub>2</sub> ( <i>p</i> -cymene)] <sub>2</sub> | DMSO               | MesCO <sub>2</sub> Li           | -                    | N.R.  |
| 43              | [RuCl <sub>2</sub> ( <i>p</i> -cymene)] <sub>2</sub> | DMF                | MesCO <sub>2</sub> Li           | -                    | 10    |
| 44              | [RuCl <sub>2</sub> ( <i>p</i> -cymene)] <sub>2</sub> | <sup>i</sup> PrOH  | MesCO <sub>2</sub> Li           | -                    | 15    |
| 45              | [RuCl <sub>2</sub> ( <i>p</i> -cymene)] <sub>2</sub> | TMBE               | MesCO <sub>2</sub> Li           | -                    | 60    |
| 46              | [RuCl <sub>2</sub> ( <i>p</i> -cymene)] <sub>2</sub> | CH <sub>3</sub> CN | MesCO <sub>2</sub> Li           | -                    | 10    |
| 47 <sup>c</sup> | [RuCl <sub>2</sub> ( <i>p</i> -cymene)] <sub>2</sub> | toluene            | MesCO <sub>2</sub> Li           | -                    | 12    |

|                 |                                                      |         |                       |   |    |
|-----------------|------------------------------------------------------|---------|-----------------------|---|----|
| 48 <sup>d</sup> | [RuCl <sub>2</sub> ( <i>p</i> -cymene)] <sub>2</sub> | toluene | MesCO <sub>2</sub> Li | - | 66 |
| 49 <sup>e</sup> | [RuCl <sub>2</sub> ( <i>p</i> -cymene)] <sub>2</sub> | toluene | MesCO <sub>2</sub> Li | - | 78 |
| 50 <sup>f</sup> | [RuCl <sub>2</sub> ( <i>p</i> -cymene)] <sub>2</sub> | toluene | MesCO <sub>2</sub> Li | - | 40 |
| 51 <sup>g</sup> | [RuCl <sub>2</sub> ( <i>p</i> -cymene)] <sub>2</sub> | toluene | MesCO <sub>2</sub> Li | - | 30 |
| 52              | Pd(OAc) <sub>2</sub>                                 | toluene | MesCO <sub>2</sub> Li | - | 0  |
| 53              | [Cp*RhCl <sub>2</sub> ] <sub>2</sub>                 | toluene | MesCO <sub>2</sub> Li | - | 0  |
| 54              | Cu(OAc) <sub>2</sub>                                 | toluene | MesCO <sub>2</sub> Li | - | 0  |
| 55              | AgOAc                                                | toluene | MesCO <sub>2</sub> Li | - | 0  |

<sup>a</sup> **1a** (0.1 mmol), **2a** (0.2 mmol), solvent (1 mL), base (1.5 equiv), catalyst (5 mol%), additive (1.5 equiv) at 110 °C under air for 24 h. <sup>b</sup> The yields were determined by <sup>1</sup>H NMR analysis of the crude product using CH<sub>2</sub>Br<sub>2</sub> as the internal standard. <sup>c</sup> At 80°C. <sup>d</sup> At 100°C. <sup>e</sup> At 120°C. <sup>f</sup> At 130°C. <sup>g</sup> At 140°C.

### 2.1.2 Table S2 Optimization of the Reaction Conditions<sup>a</sup>

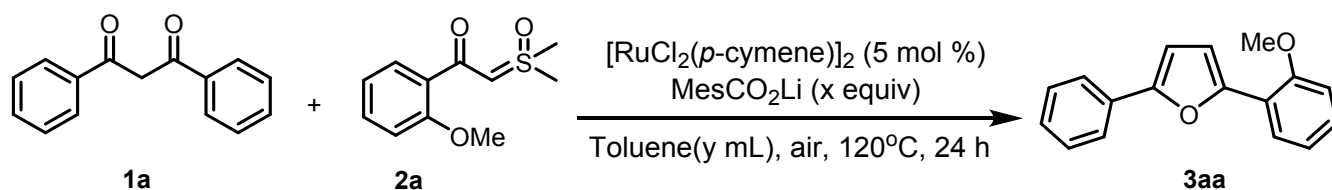

| Entry | Solvent          | Base                              | Yield (%) <sup>b</sup> |
|-------|------------------|-----------------------------------|------------------------|
| 1     | toluene          | MesCO <sub>2</sub> Li (1.0 equiv) | 66                     |
| 2     | toluene          | MesCO <sub>2</sub> Li (2.0 equiv) | 72                     |
| 3     | toluene (0.5 mL) | MesCO <sub>2</sub> Li             | 72                     |
| 4     | toluene (2 mL)   | MesCO <sub>2</sub> Li             | 85                     |
| 5     | toluene (3 mL)   | MesCO <sub>2</sub> Li             | 66                     |

<sup>a</sup> **1a** (0.1 mmol), **2a** (0.2 mmol), MesCO<sub>2</sub>Li, [RuCl<sub>2</sub>(*p*-cymene)]<sub>2</sub> (5 mol%), in toluene at 120 °C for 24 h. <sup>b</sup> The yields were determined by <sup>1</sup>H NMR analysis of the crude product using CH<sub>2</sub>Br<sub>2</sub> as the internal standard.

## 2.2 Procedure for the Synthesis of 2

**Method 1:** Under N<sub>2</sub>, trimethylsulfoxonium iodide (3.3 g, 15 mmol, 3.0 equiv) was suspended in THF (50 mL) in a flame-dried 100 mL round bottom flask, <sup>t</sup>BuOK (1.7 g, 15 mmol, 3.0 equiv) was added and the mixture was stirred at room temperature for 2 hours. After, benzoyl chloride (5 mmol, 1.0 equiv) was added. The mixture was stirred at room temperature for 3 hours and then filtered through a plug of celite before all volatiles were removed under vacuum. Purification by flash chromatography (DCM/MeOH = 50 :1) afforded products<sup>1</sup>.

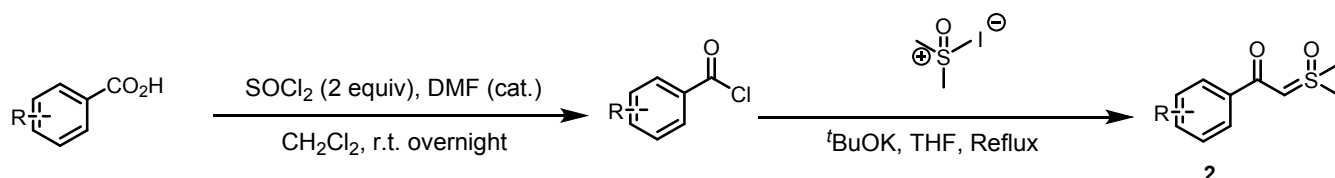

**Method 2:** Sulfurous dichloride (10 mmol, 2.0 equiv) was added to a mixture of the carboxylic acid (5 mmol, 1.0 equiv), *N,N*-dimethylformamide 3 drops in CH<sub>2</sub>Cl<sub>2</sub> (30 mL) under N<sub>2</sub> atmosphere at 0 °C. The mixture was stirred at room temperature overnight. Then, the excess of sulfurous dichloride and CH<sub>2</sub>Cl<sub>2</sub> were removed in vacuo, obtain crude benzoyl chloride<sup>2</sup>.

Under N<sub>2</sub>, trimethylsulfoxonium iodide (3.3 g, 15 mmol, 3.0 equiv) was suspended in THF (50 mL) in a flame-dried 100 mL round bottom flask, <sup>t</sup>BuOK (1.7 g, 15 mmol, 3.0 equiv) was added and the mixture was stirred at room temperature for 2 hours. After, crude benzoyl chloride (5 mmol, 1.0 equiv) was added. The mixture was stirred at room temperature for 3 hours and then filtered through a plug of celite before all volatiles were removed under vacuum. Purification by flash chromatography (DCM/MeOH = 50 :1) afforded products<sup>1</sup>.

**Method 3:** **2az** was synthesized following a literature procedure<sup>3</sup>

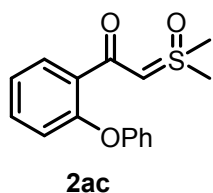

**2-(dimethyl(oxo)-λ<sup>6</sup>-sulfanylidene)-1-(2-phenoxyphenyl)ethan-1-one (2ac)** as cream solid. <sup>1</sup>H NMR (500 MHz, Chloroform-d) δ 7.88 (d, J = 7.7 Hz, 1H), 7.32 (t, J = 7.7 Hz, 1H), 7.27 (t, J = 7.8 Hz, 2H), 7.18 (t, J = 7.5 Hz, 1H), 7.01 (t, J = 7.4 Hz, 1H), 6.91 (t, J = 8.5 Hz, 3H), 5.20 (s, 1H), 3.25 (s, 6H); <sup>13</sup>C NMR (126 MHz, Chloroform-d) δ 179.3, 157.3, 153.3, 131.7, 131.0, 129.7, 129.3, 123.7, 122.2, 120.15, 117.2, 73.9, 41.1; HRMS (ESI-TOF) m/z: calcd for C<sub>16</sub>H<sub>17</sub>O<sub>3</sub>S<sup>+</sup>: 289.0893 (M + H)<sup>+</sup>, found: 289.0891.

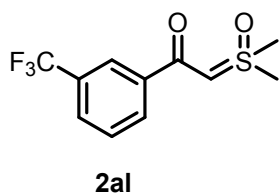

**2-(dimethyl(oxo)- $\lambda^6$ -sulfanylidene)-1-(3-(trifluoromethyl)phenyl)ethan-1-one (2al)** as beige solid.  $^1\text{H}$  NMR (500 MHz, Chloroform-*d*)  $\delta$  8.06 (s, 1H), 7.98 – 7.92 (m, 1H), 7.66 (t, *J* = 6.2 Hz, 1H), 7.48 (q, *J* = 7.3 Hz, 1H), 5.19 (d, *J* = 2.7 Hz, 1H), 3.54 (d, *J* = 3.6 Hz, 6H);  $^{13}\text{C}$  NMR (126 MHz, Chloroform-*d*)  $\delta$  180.2, 139.4, 130.1 (q, *J* = 32.3 Hz), 129.6, 128.5, 126.9 (q, *J* = 3.7 Hz), 123.8 (q, *J* = 272.4 Hz), 123.2 (q, *J* = 3.9 Hz), 70.2, 41.6; HRMS (ESI-TOF) *m/z*: calcd for  $\text{C}_{11}\text{H}_{12}\text{F}_3\text{O}_2\text{S}^+$ : 265.0505 (*M* + *H*) $^+$ , found: 265.0507.

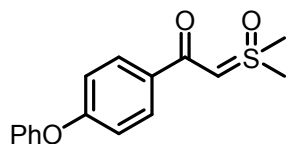

**2ao**

**2-(dimethyl(oxo)- $\lambda^6$ -sulfanylidene)-1-(4-phenoxyphenyl)ethan-1-one (2ao)** as white solid.  $^1\text{H}$  NMR (500 MHz, Chloroform-*d*)  $\delta$  7.77 (d, *J* = 8.8 Hz, 2H), 7.35 (t, *J* = 8.0 Hz, 2H), 7.13 (t, *J* = 7.5 Hz, 1H), 7.05 – 7.01 (m, 2H), 6.99 – 6.94 (m, 2H), 5.00 (s, 1H), 3.49 (s, 6H);  $^{13}\text{C}$  NMR (126 MHz, Chloroform-*d*)  $\delta$  181.3, 159.5, 156.1, 133.5, 129.7, 128.3, 123.7, 119.4, 117.5, 68.2, 42.1; HRMS (ESI-TOF) *m/z*: calcd for  $\text{C}_{16}\text{H}_{17}\text{O}_3\text{S}^+$ : 289.0893 (*M* + *H*) $^+$ , found: 289.0895.

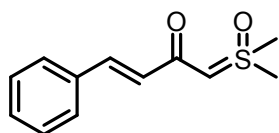

**2ba**

**(*E*)-1-(dimethyl(oxo)- $\lambda^6$ -sulfanylidene)-4-phenylbut-3-en-2-one (2ba)** as white solid.  $^1\text{H}$  NMR (500 MHz, Chloroform-*d*)  $\delta$  7.54 – 7.47 (m, 2H), 7.46 – 7.41 (m, 1H), 7.39 – 7.27 (m, 3H), 6.63 – 6.55 (m, 1H), 4.59 (d, *J* = 1.7 Hz, 1H), 3.51 – 3.46 (m, 6H);  $^{13}\text{C}$  NMR (126 MHz, Chloroform-*d*)  $\delta$  179.9, 136.4, 135.5, 129.0, 128.6, 127.6, 126.8 (d, *J* = 1.7 Hz), 71.8, 71.7, 42.3 (d, *J* = 4.5 Hz); HRMS (ESI-TOF) *m/z*: calcd for  $\text{C}_{12}\text{H}_{15}\text{O}_2\text{S}^+$ : 223.0787 (*M* + *H*) $^+$ , found: 223.0789.

## 2.3 Procedure for the Synthesis of 3

**1** was synthesized following a literature procedure<sup>4</sup>.

### 2.3.1 Procedure for Synthesis of 3aa-3aq

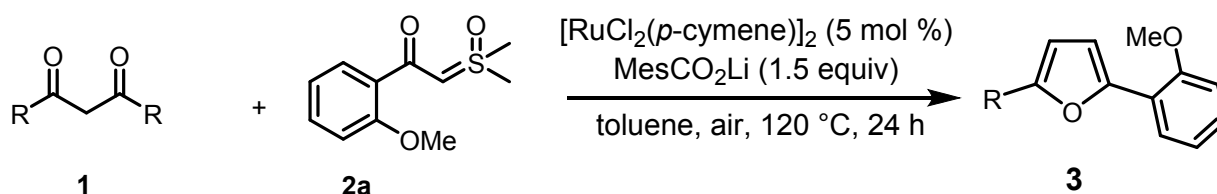

A dried 10 mL Schlenk tube was charged with **1,3-diphenylpropane-1,3-dione 1** (0.1 mmol, 1 equiv), **2-(dimethyl(oxo)- $\lambda^6$ -sulfanylidene)-1-(2-methoxyphenyl)ethan-1-one 2a** (45.3 mg, 0.2 mmol, 2 equiv),  $[\text{RuCl}_2(p\text{-cymene})]_2$  (3.1 mg, 0.005 mmol, 5 mol %),  $\text{MesCO}_2\text{Li}$  (25.5 mg, 0.15 mmol, 1.5 equiv), and toluene (2 mL). The reaction mixture was heated to 120 °C for 24 hours under vigorous

stirring. Upon completion, the reaction mixture was cooled to room temperature, diluted with ethyl acetate, and filtered through a pad of celite. The filtrate was concentrated under vacuum, and the resulting residue was purified by preparative thin layer chromatography (PTLC) with hexane to give the corresponding products.

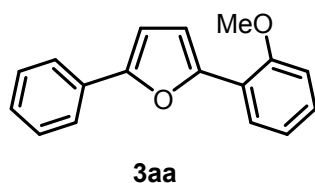

**2-(2-methoxyphenyl)-5-phenylfuran (3aa)** (20.4 mg, 82%) as a white solid.  $^1\text{H}$  NMR (500 MHz, Chloroform- $d$ )  $\delta$  8.00 – 7.97 (m, 1H), 7.76 (d,  $J$  = 7.5 Hz, 2H), 7.40 (t,  $J$  = 7.8 Hz, 2H), 7.29 – 7.22 (m, 2H), 7.06 (d,  $J$  = 7.7 Hz, 1H), 7.03 (d,  $J$  = 3.4 Hz, 1H), 6.97 (d,  $J$  = 8.2 Hz, 1H), 6.76 (d,  $J$  = 3.4 Hz, 1H), 3.95 (s, 3H);  $^{13}\text{C}$  NMR (126 MHz, Chloroform- $d$ )  $\delta$  155.4, 152.2, 149.7, 130.9, 128.6, 128.0, 127.1, 125.8, 123.7, 120.7, 119.8, 112.2, 110.9, 107.4, 55.4; HRMS (ESI-TOF)  $m/z$ : calcd for  $\text{C}_{17}\text{H}_{15}\text{O}_2^+$ : 251.1067 ( $\text{M} + \text{H}$ ) $^+$ , found: 251.1068.

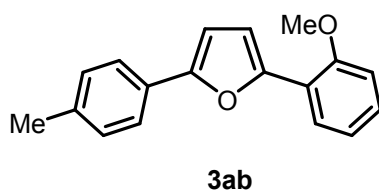

**2-(2-methoxyphenyl)-5-(*p*-tolyl)furan (3ab)** (16.9 mg, 64%) was prepared from typical procedure (hexane) as yellowish solid.  $^1\text{H}$  NMR (500 MHz, Chloroform- $d$ )  $\delta$  8.00 – 7.96 (m, 1H), 7.65 (d,  $J$  = 8.1 Hz, 2H), 7.26 – 7.22 (m, 1H), 7.20 (d,  $J$  = 7.9 Hz, 2H), 7.05 (t,  $J$  = 7.6 Hz, 1H), 7.02 (d,  $J$  = 3.4 Hz, 1H), 6.96 (d,  $J$  = 8.2 Hz, 1H), 6.70 (d,  $J$  = 3.4 Hz, 1H), 3.95 (s, 3H), 2.37 (s, 3H);  $^{13}\text{C}$  NMR (126 MHz, Chloroform- $d$ )  $\delta$  155.4, 152.5, 149.3, 137.0, 129.3, 128.2, 127.8, 125.7, 123.7, 120.7, 119.9, 112.2, 110.9, 106.6, 55.4, 21.3; HRMS (ESI-TOF)  $m/z$ : calcd for  $\text{C}_{18}\text{H}_{17}\text{O}_2^+$ : 265.1223 ( $\text{M} + \text{H}$ ) $^+$ , found: 265.1227.

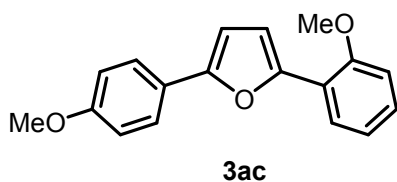

**2-(2-methoxyphenyl)-5-(4-methoxyphenyl)furan (3ac)** (13.5 mg, 48%) was prepared from typical procedure (hexane) as white solid.  $^1\text{H}$  NMR (500 MHz, Chloroform- $d$ )  $\delta$  7.97 – 7.95 (m, 1H), 7.72 – 7.65 (m, 2H), 7.25 – 7.21 (m, 1H), 7.06 – 7.02 (m, 1H), 7.01 (d,  $J$  = 3.4 Hz, 1H), 6.97 – 6.92 (m, 3H), 6.62 (d,  $J$  = 3.4 Hz, 1H), 3.94 (s, 3H), 3.83 (s, 3H);  $^{13}\text{C}$  NMR (126 MHz, Chloroform- $d$ )  $\delta$  158.9, 155.3, 152.3, 149.1, 127.7, 125.6, 125.2, 124.0, 120.7, 119.9, 114.1, 112.2, 110.9, 105.8, 55.3 (d,  $J$  = 3.4 Hz); HRMS (ESI-TOF)  $m/z$ : calcd for  $\text{C}_{18}\text{H}_{17}\text{O}_3^+$ : 281.1172 ( $\text{M} + \text{H}$ ) $^+$ , found: 281.1177.



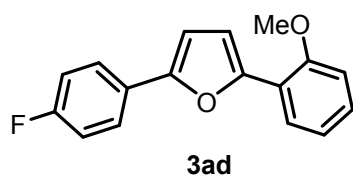

**2-(4-fluorophenyl)-5-(2-methoxyphenyl)furan (3ad)** (20.1 mg, 75%) was prepared from typical procedure (hexane) as yellowish solid.  $^1\text{H}$  NMR (500 MHz, Chloroform- $d$ )  $\delta$  7.97 – 7.93 (m, 1H), 7.74 – 7.67 (m, 2H), 7.27 – 7.22 (m, 1H), 7.11 – 7.07 (m, 2H), 7.07 – 7.03 (m, 1H), 7.01 (d,  $J$  = 3.4 Hz, 1H), 6.96 (d,  $J$  = 8.3 Hz, 1H), 6.68 (d,  $J$  = 3.4 Hz, 1H), 3.95 (s, 3H);  $^{13}\text{C}$  NMR (126 MHz, Chloroform- $d$ )  $\delta$  162.0 (d,  $J$  = 246.9 Hz), 155.4, 151.4, 149.8, 128.0, 127.3 (d,  $J$  = 3.3 Hz), 125.7, 125.4 (d,  $J$  = 7.9 Hz), 120.7, 119.7, 115.7 (d,  $J$  = 21.9 Hz), 112.2, 111.0, 107.0 (d,  $J$  = 1.7 Hz), 55.4; HRMS (ESI-TOF)  $m/z$ : calcd for  $\text{C}_{17}\text{H}_{14}\text{FO}_2^+$ : 269.0972 ( $\text{M} + \text{H}$ ) $^+$ , found: 269.0977.

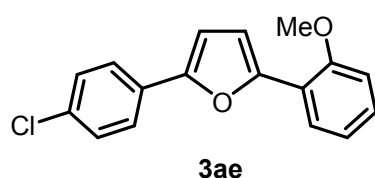

**2-(4-chlorophenyl)-5-(2-methoxyphenyl)furan (3ae)** (17 mg, 60%) was prepared from typical procedure (hexane) as colorless solid.  $^1\text{H}$  NMR (500 MHz, Chloroform- $d$ )  $\delta$  7.98 – 7.92 (m, 1H), 7.69 – 7.64 (m, 2H), 7.37 – 7.33 (m, 2H), 7.27 – 7.23 (m, 1H), 7.07 – 7.03 (m, 1H), 7.02 (d,  $J$  = 3.4 Hz, 1H), 6.97 (d,  $J$  = 8.2 Hz, 1H), 6.74 (d,  $J$  = 3.5 Hz, 1H), 3.95 (s, 3H);  $^{13}\text{C}$  NMR (126 MHz, Chloroform- $d$ )  $\delta$  155.5, 151.1, 150.1, 132.7, 129.4, 128.8, 128.2, 125.8, 124.9, 120.7, 119.5, 112.3, 111.0, 107.8, 55.4; HRMS (ESI-TOF)  $m/z$ : calcd for  $\text{C}_{17}\text{H}_{14}\text{ClO}_2^+$ : 285.0677 ( $\text{M} + \text{H}$ ) $^+$ , found: 285.0679.

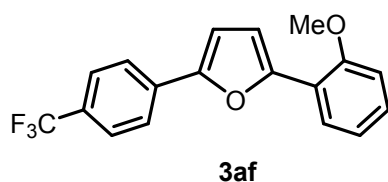

**2-(2-methoxyphenyl)-5-(4-(trifluoromethyl)phenyl)furan (3af)** (24.2 mg, 76%) was prepared from typical procedure (hexane) as white solid.  $^1\text{H}$  NMR (500 MHz, Chloroform- $d$ )  $\delta$  8.00 – 7.94 (m, 1H), 7.85 – 7.79 (m, 2H), 7.63 (d,  $J$  = 8.2 Hz, 2H), 7.31 – 7.26 (m, 1H), 7.09 – 7.06 (m, 1H), 7.05 (d,  $J$  = 3.4 Hz, 1H), 6.98 (d,  $J$  = 8.2 Hz, 1H), 6.86 (d,  $J$  = 3.5 Hz, 1H), 3.95 (s, 3H);  $^{13}\text{C}$  NMR (126 MHz, Chloroform- $d$ )  $\delta$  155.7, 150.9, 150.7, 133.9, 128.6 (q,  $J$  = 32.3 Hz), 128.5, 125.9, 125.7 (q,  $J$  = 3.9 Hz), 124.2 (q,  $J$  = 271.7 Hz), 123.6, 123.1, 120.8, 119.3, 112.4, 111.0, 109.4, 55.4; HRMS (ESI-TOF)  $m/z$ : calcd for  $\text{C}_{18}\text{H}_{14}\text{F}_3\text{O}_2^+$ : 319.0940 ( $\text{M} + \text{H}$ ) $^+$ , found: 319.0944.

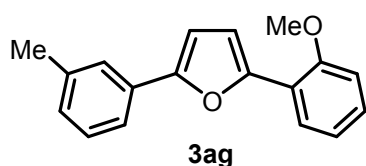

**2-(2-methoxyphenyl)-5-(*m*-tolyl)furan (3ag)** (16.7 mg, 63%) was prepared from typical procedure (hexane) as yellow solid. <sup>1</sup>H NMR (500 MHz, Chloroform-d) δ 8.02 – 7.97 (m, 1H), 7.56 (d, *J* = 11.4 Hz, 2H), 7.28 (t, *J* = 7.6 Hz, 1H), 7.26 – 7.21 (m, 1H), 7.09 – 7.05 (m, 2H), 7.02 (d, *J* = 3.5 Hz, 1H), 6.96 (d, *J* = 8.3 Hz, 1H), 6.75 – 6.73 (m, 1H), 3.94 (s, 3H), 2.40 (s, 3H). <sup>13</sup>C NMR (126 MHz, Chloroform-d) δ 155.4, 152.4, 149.6, 138.2, 130.8, 128.6, 128.0, 127.9, 125.8, 124.3, 121.0, 120.7, 119.8, 112.2, 111.0, 107.3, 55.3, 21.5. HRMS (ESI-TOF) *m/z*: calcd for C<sub>18</sub>H<sub>17</sub>O<sub>2</sub><sup>+</sup>: 265.1223 (M + H)<sup>+</sup>, found: 265.1227.

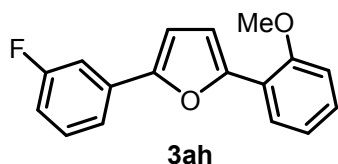

**2-(3-fluorophenyl)-5-(2-methoxyphenyl)furan (3ah)** (20.3 mg, 76%) was prepared from typical procedure (hexane) as colorless solid. <sup>1</sup>H NMR (500 MHz, Chloroform-d) δ 8.00 – 7.93 (m, 1H), 7.53 – 7.49 (m, 1H), 7.47 – 7.40 (m, 1H), 7.37 – 7.31 (m, 1H), 7.30 – 7.22 (m, 1H), 7.09 – 7.04 (m, 1H), 7.03 (d, *J* = 3.5 Hz, 1H), 6.96 (d, *J* = 8.5 Hz, 1H), 6.97 – 6.90 (m, 1H), 6.77 (d, *J* = 3.5 Hz, 1H), 3.95 (s, 3H); <sup>13</sup>C NMR (126 MHz, Chloroform-d) δ 163.2 (d, *J* = 244.9 Hz), 155.6, 151.0 (d, *J* = 3.1 Hz), 150.3, 133.0 (d, *J* = 8.5 Hz), 130.2 (d, *J* = 8.6 Hz), 128.3, 125.9, 120.8, 119.5, 119.3 (d, *J* = 2.7 Hz), 113.8 (d, *J* = 21.5 Hz), 112.2, 111.0, 110.5 (d, *J* = 23.5 Hz), 108.4, 55.4; HRMS (ESI-TOF) *m/z*: calcd for C<sub>17</sub>H<sub>14</sub>FO<sub>2</sub><sup>+</sup>: 269.0972 (M + H)<sup>+</sup>, found: 269.0975.

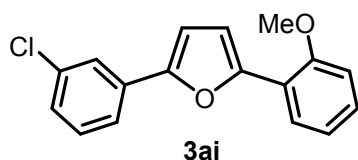

**2-(3-chlorophenyl)-5-(2-methoxyphenyl)furan (3ai)** (20 mg, 70%) was prepared from typical procedure (hexane) as cream solid. <sup>1</sup>H NMR (500 MHz, Chloroform-d) δ 7.99 – 7.95 (m, 1H), 7.72 (t, *J* = 1.8 Hz, 1H), 7.60 (d, *J* = 7.8 Hz, 1H), 7.31 (t, *J* = 7.9 Hz, 1H), 7.28 – 7.23 (m, 1H), 7.23 – 7.19 (m, 1H), 7.06 (t, *J* = 7.5 Hz, 1H), 7.03 (d, *J* = 3.5 Hz, 1H), 6.97 (d, *J* = 8.0 Hz, 1H), 6.77 (d, *J* = 3.4 Hz, 1H), 3.95 (s, 3H); <sup>13</sup>C NMR (126 MHz, Chloroform-d) δ 155.6, 150.7, 150.4, 134.7, 132.5, 129.9, 128.3, 127.0, 125.9, 123.6, 121.7, 120.8, 119.4, 112.3, 111.0, 108.5, 55.4; HRMS (ESI-TOF) *m/z*: calcd for C<sub>17</sub>H<sub>14</sub>ClO<sub>2</sub><sup>+</sup>: 285.0677 (M + H)<sup>+</sup>, found: 285.0678.

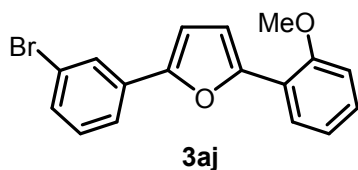

**2-(3-bromophenyl)-5-(2-methoxyphenyl)furan (3aj)** (12.1 mg, 37%) was prepared from typical procedure (hexane) as colorless solid. <sup>1</sup>H NMR (500 MHz, Chloroform-d) δ 7.99 – 7.95 (m, 1H), 7.88 (t, *J* = 1.8 Hz, 1H), 7.68 – 7.63 (m, 1H), 7.38 – 7.35 (m, 1H), 7.26 (q, *J* = 7.9, 7.3 Hz, 2H), 7.09 – 7.05 (m,

1H), 7.03 (d,  $J = 3.5$  Hz, 1H), 6.97 (d,  $J = 8.3$  Hz, 1H), 6.77 (d,  $J = 3.5$  Hz, 1H), 3.96 (s, 3H);  $^{13}\text{C}$  NMR (126 MHz, Chloroform- $d$ )  $\delta$  155.6, 150.5, 150.4, 132.8, 130.2, 129.9, 128.3, 126.5, 125.9, 122.9, 122.2, 120.8, 119.4, 112.3, 111.0, 108.5, 55.4; HRMS (ESI-TOF)  $m/z$ : calcd for  $\text{C}_{17}\text{H}_{14}\text{BrO}_2^+$ : 329.0172 ( $\text{M} + \text{H}$ ) $^+$ , found: 329.0175.

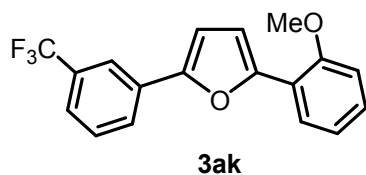

**2-(2-methoxyphenyl)-5-(3-(trifluoromethyl)phenyl)furan (3ak)** (25 mg, 79%) was prepared from typical procedure (hexane) as colorless solid.  $^1\text{H}$  NMR (500 MHz, Chloroform- $d$ )  $\delta$  8.01 – 7.94 (m, 2H), 7.92 – 7.86 (m, 1H), 7.52 – 7.47 (m, 2H), 7.29 – 7.25 (m, 1H), 7.09 – 7.06 (m, 1H), 7.05 (d,  $J = 3.5$  Hz, 1H), 6.97 (d,  $J = 8.2$  Hz, 1H), 6.83 (d,  $J = 3.5$  Hz, 1H), 3.95 (s, 3H);  $^{13}\text{C}$  NMR (126 MHz, Chloroform- $d$ )  $\delta$  155.6, 150.64, 150.61, 131.5, 131.2 (q,  $J = 32.3$  Hz), 129.1, 128.4, 126.6, 125.9, 124.0 (q,  $J = 272.4$  Hz), 123.5 (q,  $J = 3.9$  Hz), 120.8, 120.3 (q,  $J = 4.0$  Hz), 119.4, 112.3, 111.0, 108.7, 55.4; HRMS (ESI-TOF)  $m/z$ : calcd for  $\text{C}_{18}\text{H}_{14}\text{F}_3\text{O}_2^+$ : 319.0940 ( $\text{M} + \text{H}$ ) $^+$ , found: 319.0943.

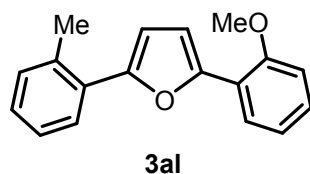

**2-(2-methoxyphenyl)-5-(*o*-tolyl)furan (3al)** (13.9 mg, 53%) was prepared from typical procedure (hexane) as white solid.  $^1\text{H}$  NMR (500 MHz, Chloroform- $d$ )  $\delta$  7.97 – 7.94 (m, 1H), 7.83 – 7.77 (m, 1H), 7.29 – 7.24 (m, 3H), 7.24 – 7.18 (m, 1H), 7.06 – 7.03 (m, 2H), 6.98 (d,  $J = 8.2$  Hz, 1H), 6.66 (d,  $J = 3.5$  Hz, 1H), 3.96 (s, 3H), 2.58 (s, 3H);  $^{13}\text{C}$  NMR (126 MHz, Chloroform- $d$ )  $\delta$  155.5, 152.0, 149.4, 134.4, 131.2, 130.2, 128.0, 127.3, 126.9, 126.0, 125.8, 120.8, 119.8, 111.9, 110.9, 110.8, 55.4, 22.1; HRMS (ESI-TOF)  $m/z$ : calcd for  $\text{C}_{18}\text{H}_{17}\text{O}_2^+$ : 265.1223 ( $\text{M} + \text{H}$ ) $^+$ , found: 265.1227.

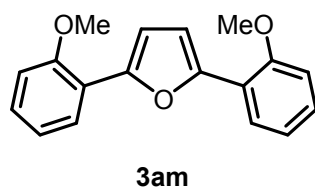

**2,5-bis(2-methoxyphenyl)furan (3am)** (8.9 mg, 32%) was prepared from typical procedure (hexane) as white solid.  $^1\text{H}$  NMR (500 MHz, Chloroform- $d$ )  $\delta$  8.02 – 7.98 (m, 2H), 7.27 – 7.21 (m, 2H), 7.09 – 7.02 (m, 4H), 6.97 (d,  $J = 8.2$  Hz, 2H), 3.96 (s, 6H);  $^{13}\text{C}$  NMR (126 MHz, Chloroform- $d$ )  $\delta$  155.5, 148.7, 127.8, 125.9, 120.7, 119.9, 112.4, 111.0, 55.4; HRMS (ESI-TOF)  $m/z$ : calcd for  $\text{C}_{18}\text{H}_{17}\text{O}_3^+$ : 281.1172 ( $\text{M} + \text{H}$ ) $^+$ , found: 281.1176.

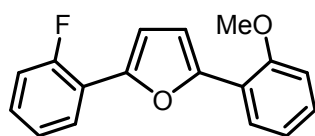

**3an**

**2-(2-fluorophenyl)-5-(2-methoxyphenyl)furan (3an)** (15 mg, 56%) was prepared from typical procedure (hexane) as cream solid.  $^1\text{H}$  NMR (500 MHz, Chloroform- $d$ )  $\delta$  7.99 – 7.97 (m, 1H), 7.97 – 7.92 (m, 1H), 7.30 – 7.24 (m, 1H), 7.24 – 7.18 (m, 2H), 7.14 – 7.09 (m, 1H), 7.09 – 7.02 (m, 2H), 6.97 (d,  $J$  = 8.3 Hz, 1H), 6.95 (t,  $J$  = 3.7 Hz, 1H), 3.96 (s, 3H);  $^{13}\text{C}$  NMR (126 MHz, Chloroform- $d$ )  $\delta$  158.7 (d,  $J$  = 250.7 Hz), 155.6, 149.6, 146.4 (d,  $J$  = 3.0 Hz), 128.2, 128.0 (d,  $J$  = 8.2 Hz), 125.92, 125.91 (d,  $J$  = 4.2 Hz), 124.3 (d,  $J$  = 3.5 Hz), 120.7, 119.6, 119.2 (d,  $J$  = 12.1 Hz), 125.9 (d,  $J$  = 21.6 Hz), 112.5 (d,  $J$  = 11.8 Hz), 112.4 (d,  $J$  = 1.7 Hz), 111.0, 55.4; HRMS (ESI-TOF)  $m/z$ : calcd for  $\text{C}_{17}\text{H}_{14}\text{FO}_2^+$ : 269.0972 ( $\text{M} + \text{H}$ ) $^+$ , found: 269.0974.

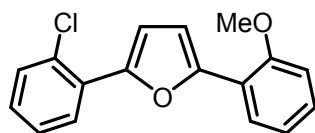

**3ao**

**2-(2-chlorophenyl)-5-(2-methoxyphenyl)furan (3ao)** (17.4 mg, 61%) was prepared from typical procedure (hexane) as orange solid.  $^1\text{H}$  NMR (500 MHz, Chloroform- $d$ )  $\delta$  8.02 – 7.94 (m, 2H), 7.48 – 7.41 (m, 1H), 7.38 – 7.30 (m, 1H), 7.29 – 7.26 (m, 1H), 7.26 – 7.23 (m, 1H), 7.21 – 7.17 (m, 1H), 7.10 – 7.02 (m, 2H), 6.98 (d,  $J$  = 8.2 Hz, 1H), 3.97 (s, 3H);  $^{13}\text{C}$  NMR (126 MHz, Chloroform- $d$ )  $\delta$  155.7, 149.8, 148.5, 130.8, 130.0, 129.2, 128.3, 127.8, 127.7, 126.8, 126.0, 120.7, 119.5, 113.3, 112.2, 111.0, 55.4. HRMS (ESI-TOF)  $m/z$ : calcd for  $\text{C}_{17}\text{H}_{14}\text{ClO}_2^+$ : 285.0677 ( $\text{M} + \text{H}$ ) $^+$ , found: 285.0678.

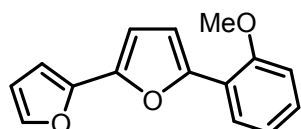

**3ap**

**5-(2-methoxyphenyl)-2,2'-bifuran (3ap)** (9.5 mg, 40%) was prepared from typical procedure (hexane) as black solid.  $^1\text{H}$  NMR (500 MHz, Chloroform- $d$ )  $\delta$  7.97 – 7.90 (m, 1H), 7.43 (d,  $J$  = 2.0 Hz, 1H), 7.28 – 7.22 (m, 1H), 7.07 – 7.02 (m, 1H), 7.01 (d,  $J$  = 3.3 Hz, 1H), 6.96 (d,  $J$  = 8.4 Hz, 1H), 6.68 – 6.61 (m, 2H), 6.51 – 6.45 (m, 1H), 3.94 (s, 3H);  $^{13}\text{C}$  NMR (126 MHz, Chloroform- $d$ )  $\delta$  155.4, 149.5, 146.8, 145.0, 141.7, 128.1, 125.8, 120.7, 119.5, 111.8, 111.4, 110.9, 107.4, 105.0, 55.4; HRMS (ESI-TOF)  $m/z$ : calcd for  $\text{C}_{15}\text{H}_{13}\text{O}_3^+$ : 241.0859 ( $\text{M} + \text{H}$ ) $^+$ , found: 241.0860.

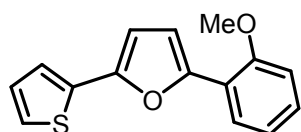

**3aq**

**2-(2-methoxyphenyl)-5-(thiophen-2-yl)furan (3aq)** (15.4 mg, 60%) was prepared from typical procedure (hexane) as dark brown solid. <sup>1</sup>H NMR (500 MHz, Chloroform-d) δ 7.95 – 7.91 (m, 1H), 7.33 – 7.31 (m, 1H), 7.26 – 7.24 (m, 1H), 7.23 – 7.21 (m, 1H), 7.07 – 7.03 (m, 2H), 7.00 (d, J = 3.5 Hz, 1H), 6.96 (d, J = 8.2 Hz, 1H), 6.60 (d, J = 3.4 Hz, 1H), 3.95 (s, 3H); <sup>13</sup>C NMR (126 MHz, Chloroform-d) δ 155.4, 149.3, 147.9, 134.0, 128.0, 127.6, 125.7, 123.9, 122.4, 120.7, 119.5, 112.1, 110.9, 107.3, 55.4; HRMS (ESI-TOF) m/z: calcd for C<sub>15</sub>H<sub>13</sub>O<sub>2</sub>S<sup>+</sup>: 257.0631 (M + H)<sup>+</sup>, found: 257.0635.

### 2.3.2 Procedure for Synthesis of 3ba-3bz

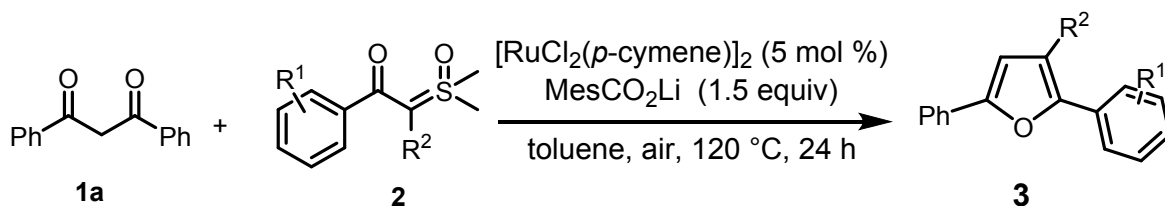

A dried 10 mL Schlenk tube was charged with **1,3-diphenylpropane-1,3-dione 1a** (22.4 mg, 0.1 mmol, 1 equiv), **sulfoxonium ylide 2** (0.2 mmol, 2 equiv), [RuCl<sub>2</sub>(*p*-cymene)]<sub>2</sub> (3.1 mg, 0.005 mmol, 5 mol %), MesCO<sub>2</sub>Li (25.5 mg, 0.15 mmol, 1.5 equiv), and toluene (2 mL). The reaction mixture was heated to 120 °C for 24 hours under vigorous stirring. Upon completion, the reaction mixture was cooled to room temperature, diluted with ethyl acetate, and filtered through a pad of celite. The filtrate was concentrated under vacuum, and the resulting residue was purified by preparative thin layer chromatography (PTLC) with hexane to give the corresponding products.

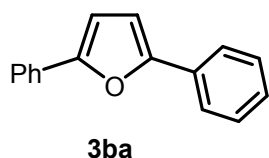

**2,5-diphenylfuran (3ba)** (9.2 mg, 42%) was prepared from typical procedure (hexane) as beige solid. <sup>1</sup>H NMR (500 MHz, Chloroform-d) δ 7.79 – 7.74 (m, 4H), 7.42 (t, J = 7.8 Hz, 4H), 7.30 – 7.26 (m, 2H), 6.75 (s, 2H); <sup>13</sup>C NMR (126 MHz, Chloroform-d) δ 153.3, 130.7, 128.7, 127.3, 123.7, 107.2; HRMS (ESI-TOF) m/z: calcd for C<sub>16</sub>H<sub>13</sub>O<sup>+</sup>: 221.0961 (M + H)<sup>+</sup>, found: 221.0957.

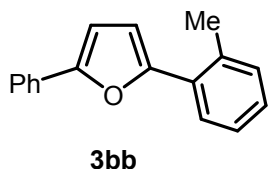

**2-phenyl-5-(*o*-tolyl)furan (3bb)** (17 mg, 73%) was prepared from typical procedure (hexane) as yellow oil. <sup>1</sup>H NMR (500 MHz, Chloroform-d) δ 7.81 (d, J = 7.8 Hz, 1H), 7.78 – 7.75 (m, 2H), 7.42 (t, J = 7.8 Hz, 2H), 7.31 (d, J = 6.7 Hz, 1H), 7.28 (d, J = 7.4 Hz, 2H), 7.25 – 7.21 (m, 1H), 6.79 (d, J = 3.5 Hz, 1H), 6.66 (d, J = 3.4 Hz, 1H), 2.59 (s, 3H); <sup>13</sup>C NMR (126 MHz, Chloroform-d) δ 153.1, 153.0,

134.4, 131.3, 130.8, 130.0, 128.7, 127.4, 127.3, 126.8, 126.0, 123.7, 110.6, 106.9, 22.1; HRMS (ESI-TOF) m/z: calcd for C<sub>17</sub>H<sub>15</sub>O<sup>+</sup>: 235.1117 (M + H)<sup>+</sup>, found: 235.1117.

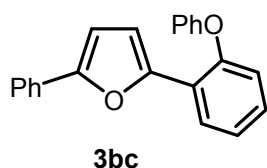

**2-(2-phenoxyphenyl)-5-phenylfuran (3bc)** (16.4 mg, 53%) was prepared from typical procedure (hexane) as yellow oil. <sup>1</sup>H NMR (500 MHz, Chloroform-d) δ 8.13 – 8.08 (m, 1H), 7.79 – 7.74 (m, 2H), 7.43 (t, J = 7.8 Hz, 2H), 7.41 – 7.36 (m, 2H), 7.32 – 7.28 (m, 1H), 7.28 – 7.23 (m, 2H), 7.17 – 7.12 (m, 1H), 7.10 – 7.06 (m, 2H), 7.02 (d, J = 3.5 Hz, 1H), 7.01 – 6.98 (m, 1H), 6.75 (d, J = 3.5 Hz, 1H); <sup>13</sup>C NMR (126 MHz, Chloroform-d) δ 156.9, 152.7, 152.4, 149.0, 130.7, 129.8, 128.7, 128.0, 127.3, 126.2, 123.9, 123.8, 123.2, 122.8, 119.8, 118.3, 112.5, 107.5; HRMS (ESI-TOF) m/z: calcd for C<sub>22</sub>H<sub>17</sub>O<sub>2</sub><sup>+</sup>: 313.1223 (M + H)<sup>+</sup>, found: 313.1226.

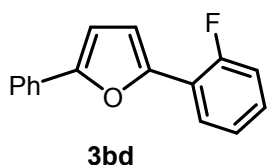

**2-(2-fluorophenyl)-5-phenylfuran (3bd)** (14.2 mg, 60%) was prepared from typical procedure (hexane) as yellow oil. <sup>1</sup>H NMR (500 MHz, Chloroform-d) δ 8.00 – 7.91 (m, 1H), 7.80 – 7.74 (m, 2H), 7.43 (t, J = 7.8 Hz, 2H), 7.32 – 7.28 (m, 1H), 7.26 – 7.21 (m, 2H), 7.17 – 7.11 (m, 1H), 6.95 (t, J = 3.6 Hz, 1H), 6.79 (d, J = 3.5 Hz, 1H); <sup>13</sup>C NMR (126 MHz, Chloroform-d) δ 158.7 (d, J = 250.7 Hz), 153.2, 147.4 (d, J = 3.1 Hz), 130.5, 128.7, 128.2 (d, J = 8.4 Hz), 127.5, 125.8 (d, J = 3.2 Hz), 124.3 (d, J = 3.5 Hz), 123.9, 119.0 (d, J = 12.0 Hz), 115.9 (d, J = 21.4 Hz), 112.4 (d, J = 12.1 Hz), 107.5 (d, J = 1.8 Hz); HRMS (ESI-TOF) m/z: calcd for C<sub>16</sub>H<sub>12</sub>FO<sup>+</sup>: 239.0867 (M + H)<sup>+</sup>, found: 239.0866.

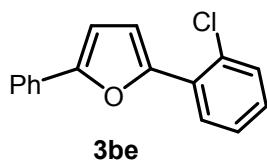

**2-(2-chlorophenyl)-5-phenylfuran (3be)** (10.6 mg, 42%) was prepared from typical procedure (hexane) as yellow white solid. <sup>1</sup>H NMR (500 MHz, Chloroform-d) δ 8.01 – 7.97 (m, 1H), 7.79 – 7.75 (m, 2H), 7.47 – 7.45 (m, 1H), 7.42 (t, J = 7.8 Hz, 2H), 7.38 – 7.33 (m, 1H), 7.32 – 7.28 (m, 1H), 7.24 (d, J = 3.5 Hz, 1H), 7.23 – 7.19 (m, 1H), 6.80 (d, J = 3.6 Hz, 1H); <sup>13</sup>C NMR (126 MHz, Chloroform-d) δ 153.3, 149.5, 130.8, 130.5, 130.0, 129.1, 128.7, 127.9, 127.7, 127.6, 126.9, 123.9, 113.2, 107.2; HRMS (ESI-TOF) m/z: calcd for C<sub>16</sub>H<sub>12</sub>ClO<sup>+</sup>: 255.0571 (M + H)<sup>+</sup>, found: 255.0572.

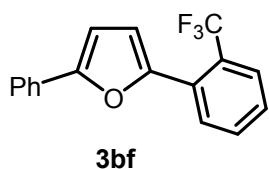

**2-phenyl-5-(2-(trifluoromethyl)phenyl)furan (3bf)** (13.5 mg, 47%) was prepared from typical procedure (hexane) as yellow oil.  $^1\text{H}$  NMR (500 MHz, Chloroform- $d$ )  $\delta$  7.84 (d,  $J = 7.9$  Hz, 1H), 7.79 (d,  $J = 8.1$  Hz, 1H), 7.79 – 7.73 (m, 2H), 7.60 (t,  $J = 7.6$  Hz, 1H), 7.46 – 7.38 (m, 3H), 7.30 (t,  $J = 7.4$  Hz, 1H), 6.82 (d,  $J = 3.5$  Hz, 1H), 6.78 (d,  $J = 3.5$  Hz, 1H);  $^{13}\text{C}$  NMR (126 MHz, Chloroform- $d$ )  $\delta$  154.5, 150.0, 131.7, 130.5, 129.6, 129.5 (d,  $J = 2.1$  Hz), 128.7, 127.8, 127.5, 127.3, 126.2 (d,  $J = 31.3$  Hz), 124.1 (q,  $J = 273.3$  Hz), 123.9, 112.2 (q,  $J = 3.1$  Hz), 107.0; HRMS (ESI-TOF)  $m/z$ : calcd for  $\text{C}_{17}\text{H}_{12}\text{F}_3\text{O}^+$ : 289.0835 ( $\text{M} + \text{H}^+$ ), found: 289.0838.

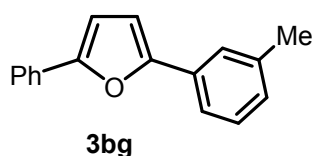

**2-phenyl-5-(*m*-tolyl)furan (3bg)** (12.1 mg, 52%) was prepared from typical procedure (hexane) as cream solid.  $^1\text{H}$  NMR (500 MHz, Chloroform- $d$ )  $\delta$  7.79 – 7.73 (m, 2H), 7.60 – 7.53 (m, 2H), 7.42 (t,  $J = 7.8$  Hz, 2H), 7.34 – 7.24 (m, 2H), 7.10 (d,  $J = 7.5$  Hz, 1H), 6.74 (q,  $J = 3.4$  Hz, 2H), 2.42 (s, 3H);  $^{13}\text{C}$  NMR (126 MHz, Chloroform- $d$ )  $\delta$  153.5, 153.2, 138.3, 130.8, 130.7, 128.7, 128.6, 128.2, 127.3, 124.3, 123.7, 120.9, 107.2, 107.1, 21.5; HRMS (ESI-TOF)  $m/z$ : calcd for  $\text{C}_{17}\text{H}_{15}\text{O}^+$ : 235.1117 ( $\text{M} + \text{H}^+$ ), found: 235.1120.

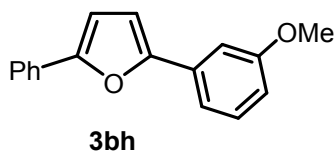

**2-(3-methoxyphenyl)-5-phenylfuran (3bh)** (9.4 mg, 38%) was prepared from typical procedure (hexane) as yellow oil.  $^1\text{H}$  NMR (500 MHz, Chloroform- $d$ )  $\delta$  7.77 – 7.74 (m, 2H), 7.44 – 7.39 (m, 2H), 7.37 – 7.32 (m, 2H), 7.32 – 7.26 (m, 2H), 6.86 – 6.82 (m, 1H), 6.75 (s, 2H), 3.89 (s, 3H);  $^{13}\text{C}$  NMR (126 MHz, Chloroform- $d$ )  $\delta$  159.9, 153.4, 153.1, 132.0, 130.7, 129.8, 128.7, 127.4, 123.7, 116.4, 112.9, 109.2, 107.6, 107.2, 55.3; HRMS (ESI-TOF)  $m/z$ : calcd for  $\text{C}_{17}\text{H}_{15}\text{O}_2^+$ : 251.1067 ( $\text{M} + \text{H}^+$ ), found: 251.1070.

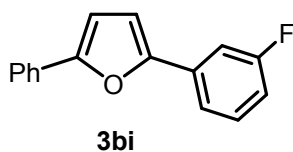

**2-(3-fluorophenyl)-5-phenylfuran (3bi)** (8.8 mg, 37%) was prepared from typical procedure (hexane) as cream solid.  $^1\text{H}$  NMR (500 MHz, Chloroform- $d$ )  $\delta$  7.79 – 7.72 (m, 2H), 7.51 (d,  $J = 7.8$  Hz, 1H), 7.48 – 7.39 (m, 3H), 7.39 – 7.34 (m, 1H), 7.33 – 7.27 (m, 1H), 7.00 – 6.92 (m, 1H), 6.78 – 6.74 (m, 2H);  $^{13}\text{C}$

NMR (126 MHz, Chloroform-d)  $\delta$  163.2 (d,  $J = 245.1$  Hz), 153.8, 152.0 (d,  $J = 3.1$  Hz), 132.8 (d,  $J = 8.5$  Hz), 130.5, 130.3 (d,  $J = 8.5$  Hz), 128.7, 127.6, 123.8, 119.3 (d,  $J = 2.9$  Hz), 114.0 (d,  $J = 21.5$  Hz), 110.5 (d,  $J = 23.5$  Hz), 108.3, 107.3; HRMS (ESI-TOF)  $m/z$ : calcd for  $C_{16}H_{12}FO^+$ : 239.0867 (M + H)<sup>+</sup>, found: 239.0868.

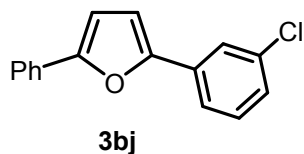

**2-(3-chlorophenyl)-5-phenylfuran (3bj)** (11.9 mg, 47%) was prepared from typical procedure (hexane) as white solid. <sup>1</sup>H NMR (500 MHz, Chloroform-d)  $\delta$  7.77 – 7.74 (m, 2H), 7.73 (t,  $J = 1.9$  Hz, 1H), 7.61 (m, 1H), 7.45 – 7.40 (m, 2H), 7.33 (t,  $J = 7.9$  Hz, 1H), 7.31 – 7.28 (m, 1H), 7.25 – 7.22 (m, 1H), 6.78 – 6.74 (m, 2H); <sup>13</sup>C NMR (126 MHz, Chloroform-d)  $\delta$  153.9, 151.8, 134.7, 132.4, 130.4, 130.0, 128.7, 127.6, 127.1, 123.8, 123.6, 121.7, 108.3, 107.3; HRMS (ESI-TOF)  $m/z$ : calcd for  $C_{16}H_{12}ClO^+$ : 255.0571 (M + H)<sup>+</sup>, found: 255.0573.

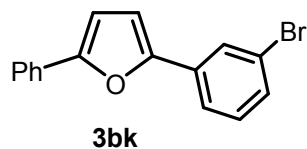

**2-(3-bromophenyl)-5-phenylfuran (3bk)** (16.8 mg, 56%) was prepared from typical procedure (hexane) as cream solid. <sup>1</sup>H NMR (500 MHz, Chloroform-d)  $\delta$  7.88 (t,  $J = 1.8$  Hz, 1H), 7.79 – 7.72 (m, 2H), 7.67 – 7.64 (m, 1H), 7.45 – 7.40 (m, 2H), 7.40 – 7.37 (m, 1H), 7.32 – 7.28 (m, 1H), 7.27 – 7.25 (m, 1H), 6.77 – 6.74 (m, 2H); <sup>13</sup>C NMR (126 MHz, Chloroform-d)  $\delta$  154.0, 151.6, 132.6, 130.4, 130.2, 130.1, 128.7, 127.6, 126.5, 123.8, 122.9, 122.1, 108.3, 107.2; HRMS (ESI-TOF)  $m/z$ : calcd for  $C_{16}H_{12}BrO^+$ : 299.0066 (M + H)<sup>+</sup>, found: 299.0065.

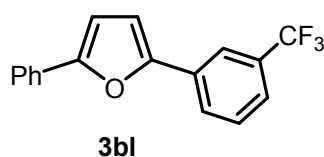

**2-phenyl-5-(3-(trifluoromethyl)phenyl)furan (3bl)** (18.1 mg, 63%) was prepared from typical procedure (hexane) as yellowish solid. <sup>1</sup>H NMR (500 MHz, Chloroform-d)  $\delta$  7.97 (s, 1H), 7.93 – 7.87 (m, 1H), 7.77 (d,  $J = 7.4$  Hz, 2H), 7.57 – 7.48 (m, 2H), 7.44 (t,  $J = 7.8$  Hz, 2H), 7.31 (t,  $J = 7.5$  Hz, 1H), 6.83 (d,  $J = 3.5$  Hz, 1H), 6.77 (d,  $J = 3.5$  Hz, 1H); <sup>13</sup>C NMR (126 MHz, Chloroform-d)  $\delta$  154.2, 151.7, 131.4, 131.2 (q,  $J = 32.3$  Hz), 130.3, 129.2, 128.8, 127.7, 126.6, 124.1 (q,  $J = 272.4$  Hz), 123.9, 123.7 (d,  $J = 4.9$  Hz), 120.3 (d,  $J = 4.0$  Hz), 108.6, 107.3; HRMS (ESI-TOF)  $m/z$ : calcd for  $C_{17}H_{12}F_3O^+$ : 289.0835 (M + H)<sup>+</sup>, found: 289.0836.



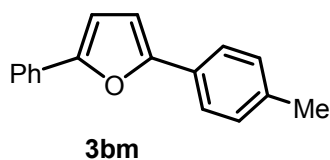

**2-phenyl-5-(*p*-tolyl)furan (3bm)** (11.9 mg, 51%) was prepared from typical procedure (hexane) as pale yellow solid. <sup>1</sup>H NMR (500 MHz, Chloroform-*d*) δ 7.64 – 7.60 (m, 2H), 7.52 (d, *J* = 8.1 Hz, 2H), 7.27 (t, *J* = 7.7 Hz, 2H), 7.16 – 7.11 (m, 1H), 7.09 (d, *J* = 7.9 Hz, 2H), 6.62 – 6.59 (m, 1H), 6.57 – 6.53 (m, 1H), 2.25 (s, 3H); <sup>13</sup>C NMR (126 MHz, Chloroform-*d*) δ 153.6, 152.9, 137.2, 130.8, 129.4, 128.7, 128.1, 127.2, 123.7, 123.6, 107.2, 106.5, 21.3; HRMS (ESI-TOF) *m/z*: calcd for C<sub>17</sub>H<sub>15</sub>O<sup>+</sup>: 235.1117 (M + H)<sup>+</sup>, found: 235.1121.

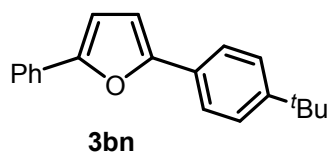

**2-(4-(*tert*-butyl)phenyl)-5-phenylfuran (3bn)** (14.4 mg, 52%) was prepared from typical procedure (hexane) as white solid. <sup>1</sup>H NMR (500 MHz, Chloroform-*d*) δ 7.77 – 7.74 (m, 2H), 7.71 – 7.67 (m, 2H), 7.46 – 7.43 (m, 2H), 7.42 (t, *J* = 7.9 Hz, 2H), 7.30 – 7.25 (m, 1H), 6.76 – 6.73 (m, 1H), 6.71 – 6.68 (m, 1H), 1.36 (s, 9H); <sup>13</sup>C NMR (126 MHz, Chloroform-*d*) δ 153.5, 153.0, 150.4, 130.9, 128.7, 128.1, 127.2, 125.6, 123.6, 123.5, 107.2, 106.6, 34.6, 31.3; HRMS (ESI-TOF) *m/z*: calcd for C<sub>20</sub>H<sub>21</sub>O<sup>+</sup>: 277.1587 (M + H)<sup>+</sup>, found: 277.1586.

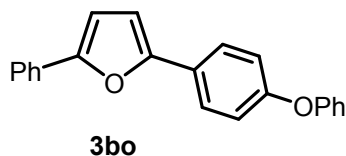

**2-(4-phenoxyphenyl)-5-phenylfuran (3bo)** (14.1 mg, 45%) was prepared from typical procedure (hexane) as yellowish solid. <sup>1</sup>H NMR (500 MHz, Chloroform-*d*) δ 7.78 – 7.69 (m, 4H), 7.41 (t, *J* = 7.8 Hz, 2H), 7.39 – 7.35 (m, 2H), 7.30 – 7.25 (m, 1H), 7.14 (t, *J* = 7.4 Hz, 1H), 7.10 – 7.03 (m, 4H), 6.74 (d, *J* = 3.5 Hz, 1H), 6.67 (d, *J* = 3.4 Hz, 1H); <sup>13</sup>C NMR (126 MHz, Chloroform-*d*) δ 157.0, 156.6, 153.1, 153.0, 130.7, 129.8, 128.7, 127.2, 126.2, 125.2, 123.6, 123.4, 119.1, 118.9, 107.2, 106.5; HRMS (ESI-TOF) *m/z*: calcd for C<sub>22</sub>H<sub>17</sub>O<sub>2</sub><sup>+</sup>: 313.1223 (M + H)<sup>+</sup>, found: 313.1228.

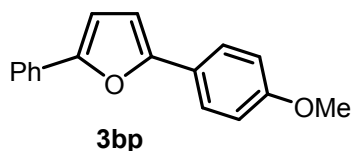

**2-(4-methoxyphenyl)-5-phenylfuran (3bp)** (13.8 mg, 55%) was prepared from typical procedure (hexane) as white solid. <sup>1</sup>H NMR (500 MHz, Chloroform-*d*) δ 7.75 – 7.72 (m, 2H), 7.71 – 7.67 (m, 2H), 7.40 (t, *J* = 7.8 Hz, 2H), 7.30 – 7.22 (m, 1H), 6.97 – 6.94 (m, 2H), 6.72 (d, *J* = 3.4 Hz, 1H), 6.61 (d, *J* = 3.4 Hz, 1H), 3.85 (s, 3H); <sup>13</sup>C NMR (126 MHz, Chloroform-*d*) δ 159.0, 153.4, 152.6, 130.9, 128.6,

127.1, 125.2, 123.9, 123.5, 114.1, 107.2, 105.6, 55.3; HRMS (ESI-TOF)  $m/z$ : calcd for  $C_{17}H_{15}O_2^+$ : 251.1067 ( $M + H$ )<sup>+</sup>, found: 251.1070.

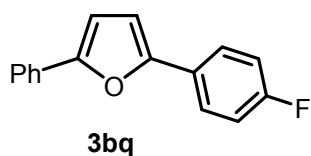

**2-(4-fluorophenyl)-5-phenylfuran (3bq)** (13.8 mg, 58%) was prepared from typical procedure (hexane) as cream solid. <sup>1</sup>H NMR (500 MHz, Chloroform-*d*)  $\delta$  7.79 – 7.68 (m, 4H), 7.42 (t,  $J = 7.8$  Hz, 2H), 7.32 – 7.25 (m, 1H), 7.14 – 7.08 (m, 2H), 6.75 – 6.72 (m, 1H), 6.68 – 6.66 (m, 1H); <sup>13</sup>C NMR (126 MHz, Chloroform-*d*)  $\delta$  162.1 (d,  $J = 247.1$  Hz), 153.3, 152.5, 130.6, 128.7, 127.4, 127.3, 127.1 (d,  $J = 3.5$  Hz), 125.4 (d,  $J = 7.9$  Hz), 123.7, 123.6, 115.7 (d,  $J = 21.9$  Hz), 107.2, 106.8 (d,  $J = 1.6$  Hz); HRMS (ESI-TOF)  $m/z$ : calcd for  $C_{16}H_{12}FO^+$ : 239.0867 ( $M + H$ )<sup>+</sup>, found: 239.0869.

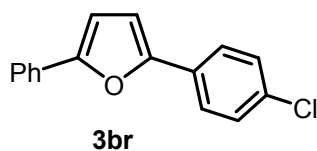

**2-(4-chlorophenyl)-5-phenylfuran (3br)** (12.9 mg, 51%) was prepared from typical procedure (hexane) as white solid. <sup>1</sup>H NMR (500 MHz, Chloroform-*d*)  $\delta$  7.79 – 7.71 (m, 2H), 7.70 – 7.62 (m, 2H), 7.42 (t,  $J = 7.7$  Hz, 2H), 7.37 (d,  $J = 8.6$  Hz, 2H), 7.29 (t,  $J = 7.4$  Hz, 1H), 6.74 (q,  $J = 3.5$  Hz, 2H); <sup>13</sup>C NMR (126 MHz, Chloroform-*d*)  $\delta$  153.6, 152.2, 132.9, 130.5, 129.2, 128.9, 128.7, 127.5, 124.9, 123.7, 107.7, 107.3; HRMS (ESI-TOF)  $m/z$ : calcd for  $C_{16}H_{12}ClO^+$ : 255.0571 ( $M + H$ )<sup>+</sup>, found: 255.0570.

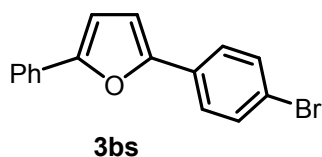

**2-(4-bromophenyl)-5-phenylfuran (3bs)** (13.2 mg, 44%) was prepared from typical procedure (hexane) as white solid. <sup>1</sup>H NMR (500 MHz, Chloroform-*d*)  $\delta$  7.77 – 7.71 (m, 2H), 7.62 – 7.59 (m, 2H), 7.54 – 7.51 (m, 2H), 7.42 (t,  $J = 7.8$  Hz, 2H), 7.31 – 7.27 (m, 1H), 6.75 – 6.72 (m, 2H); <sup>13</sup>C NMR (126 MHz, Chloroform-*d*)  $\delta$  153.7, 152.2, 131.8, 130.5, 129.6, 128.7, 127.5, 125.1, 123.7, 121.0, 107.8, 107.3; HRMS (ESI-TOF)  $m/z$ : calcd for  $C_{16}H_{12}BrO^+$ : 299.0066 ( $M + H$ )<sup>+</sup>, found: 299.0067.

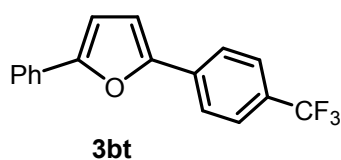

**2-phenyl-5-(4-(trifluoromethyl)phenyl)furan (3bt)** (15.2 mg, 53%) was prepared from typical procedure (hexane) as light yellow solid. <sup>1</sup>H NMR (500 MHz, Chloroform-*d*)  $\delta$  7.83 (d,  $J = 8.1$  Hz, 2H), 7.79 – 7.73 (m, 2H), 7.65 (d,  $J = 8.2$  Hz, 2H), 7.43 (t,  $J = 7.8$  Hz, 2H), 7.34 – 7.29 (m, 1H), 6.86 (d,  $J = 3.5$  Hz, 1H), 6.77 (d,  $J = 3.5$  Hz, 1H); <sup>13</sup>C NMR (126 MHz, Chloroform-*d*)  $\delta$  154.4, 151.7, 133.8, 130.3,

128.81 (q,  $J = 31.5$  Hz), 128.78, 127.8, 125.7 (q,  $J = 3.9$  Hz), 124.2 (q,  $J = 271.8$  Hz), 123.9, 123.6, 109.2, 107.4; HRMS (ESI-TOF)  $m/z$ : calcd for  $C_{17}H_{12}F_3O^+$ : 289.0835 ( $M + H$ )<sup>+</sup>, found: 289.0839.

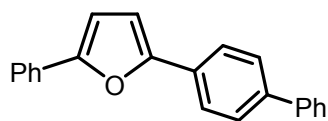

**3bu**

**2-([1,1'-biphenyl]-4-yl)-5-phenylfuran (3bu)** (17.7 mg, 60%) was prepared from typical procedure (hexane) as colorless solid. <sup>1</sup>H NMR (500 MHz, Chloroform-*d*)  $\delta$  7.86 – 7.82 (m, 2H), 7.81 – 7.75 (m, 2H), 7.70 – 7.62 (m, 4H), 7.47 (t,  $J = 7.7$  Hz, 2H), 7.43 (t,  $J = 7.8$  Hz, 2H), 7.37 (t,  $J = 7.4$  Hz, 1H), 7.29 (t,  $J = 7.4$  Hz, 1H), 6.81 – 6.76 (m, 2H); <sup>13</sup>C NMR (126 MHz, Chloroform-*d*)  $\delta$  153.4, 153.1, 140.6, 139.9, 130.7, 129.7, 128.8, 128.7, 127.4, 126.9, 124.1, 123.7, 107.4, 107.3; HRMS (ESI-TOF)  $m/z$ : calcd for  $C_{22}H_{17}O^+$ : 297.1274 ( $M + H$ )<sup>+</sup>, found: 297.1274.

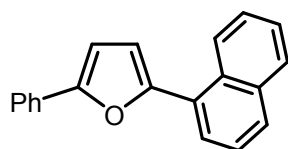

**3bv**

**2-(naphthalen-1-yl)-5-phenylfuran (3bv)** (9.2 mg, 34%) was prepared from typical procedure (hexane) as yellow oil. <sup>1</sup>H NMR (500 MHz, Chloroform-*d*)  $\delta$  8.54 (d,  $J = 8.6$  Hz, 1H), 7.93 – 7.90 (m, 1H), 7.86 (d,  $J = 8.3$  Hz, 1H), 7.85 – 7.83 (m, 1H), 7.83 – 7.77 (m, 2H), 7.60 – 7.56 (m, 1H), 7.56 – 7.52 (m, 2H), 7.46 – 7.41 (m, 2H), 7.32 – 7.28 (m, 1H), 6.87 (d,  $J = 3.4$  Hz, 1H), 6.84 (d,  $J = 3.4$  Hz, 1H); <sup>13</sup>C NMR (126 MHz, Chloroform-*d*)  $\delta$  153.8, 152.9, 134.0, 130.8, 130.2, 128.7, 128.6, 128.5, 128.4, 127.4, 126.6, 126.0, 125.9, 125.5, 125.3, 123.7, 111.4, 106.9; HRMS (ESI-TOF)  $m/z$ : calcd for  $C_{20}H_{15}O^+$ : 271.1117 ( $M + H$ )<sup>+</sup>, found: 271.1115.

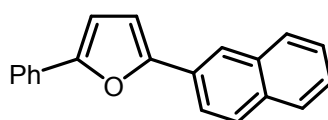

**3bw**

**2-(naphthalen-2-yl)-5-phenylfuran (3bw)** (12.1 mg, 45%) was prepared from typical procedure (hexane) as yellow solid. <sup>1</sup>H NMR (500 MHz, Chloroform-*d*)  $\delta$  8.23 (s, 1H), 7.91 (d,  $J = 8.0$  Hz, 1H), 7.87 (d,  $J = 8.6$  Hz, 1H), 7.87 – 7.79 (m, 4H), 7.53 – 7.47 (m, 2H), 7.47 – 7.43 (m, 2H), 7.33 – 7.29 (m, 1H), 6.87 (d,  $J = 3.5$  Hz, 1H), 6.80 (d,  $J = 3.5$  Hz, 1H); <sup>13</sup>C NMR (126 MHz, Chloroform-*d*)  $\delta$  153.6, 153.4, 133.6, 132.7, 130.7, 128.7, 128.4, 128.1, 128.0, 127.8, 127.4, 126.5, 125.9, 123.8, 122.2, 121.9, 107.9, 107.4; HRMS (ESI-TOF)  $m/z$ : calcd for  $C_{20}H_{15}O^+$ : 271.1117 ( $M + H$ )<sup>+</sup>, found: 271.1118.

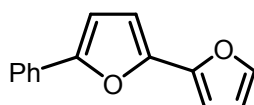

**3bx**

**5-phenyl-2,2'-bifuran (3bx)** (11.4 mg, 54%) was prepared from typical procedure (hexane) as reddish black oil. <sup>1</sup>H NMR (500 MHz, Chloroform-d) δ 7.75 – 7.69 (m, 2H), 7.44 (s, 1H), 7.40 (t, J = 7.8 Hz, 2H), 7.31 – 7.24 (m, 1H), 6.72 (d, J = 3.5 Hz, 1H), 6.65 – 6.63 (m, 2H), 6.52 – 6.46 (m, 1H); <sup>13</sup>C NMR (126 MHz, Chloroform-d) δ 153.1, 146.5, 146.0, 141.8, 130.4, 128.7, 127.4, 123.7, 111.5, 107.2, 106.8, 105.2; HRMS (ESI-TOF) m/z: calcd for C<sub>14</sub>H<sub>11</sub>O<sub>2</sub><sup>+</sup>: 211.0754 (M + H)<sup>+</sup>, found: 211.0759.

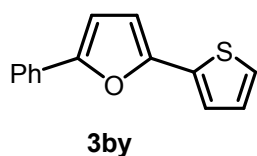

**2-phenyl-5-(thiophen-2-yl)furan (3by)** (12.5 mg, 55%) was prepared from typical procedure (hexane) as black solid. <sup>1</sup>H NMR (500 MHz, Chloroform-d) δ 7.76 – 7.69 (m, 2H), 7.41 (t, J = 7.8 Hz, 2H), 7.34 – 7.31 (m, 1H), 7.30 – 7.26 (m, 1H), 7.26 – 7.23 (m, 1H), 7.10 – 7.04 (m, 1H), 6.71 (d, J = 3.4 Hz, 1H), 6.59 (d, J = 3.5 Hz, 1H). <sup>13</sup>C NMR (126 MHz, Chloroform-d) δ 152.9, 148.9, 133.7, 130.5, 128.7, 127.7, 127.4, 124.1, 123.7, 122.5, 107.2, 107.1; HRMS (ESI-TOF) m/z: calcd for C<sub>14</sub>H<sub>11</sub>OS<sup>+</sup>: 227.0525 (M + H)<sup>+</sup>, found: 227.0529.

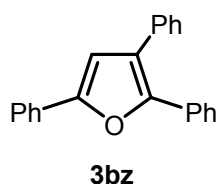

**2,3,5-triphenylfuran (3bz)** (7.9 mg, 27%) as a white solid. <sup>1</sup>H NMR (500 MHz, Chloroform-d) δ 7.80 – 7.73 (m, 2H), 7.63 – 7.59 (m, 2H), 7.49 – 7.46 (m, 2H), 7.44 – 7.37 (m, 4H), 7.35 – 7.28 (m, 4H), 7.28 – 7.23 (m, 1H), 6.82 (s, 1H); <sup>13</sup>C NMR (126 MHz, Chloroform-d) δ 152.5, 147.9, 134.3, 131.1, 130.5, 128.7, 128.7, 128.7, 128.4, 127.5, 127.5, 127.3, 126.1, 124.5, 123.8, 109.4; HRMS (ESI-TOF) m/z: calcd for C<sub>22</sub>H<sub>17</sub>O<sup>+</sup>: 297.1274 (M + H)<sup>+</sup>, found: 297.1275.

### 2.3.3 Procedure for Synthesis of 3ca

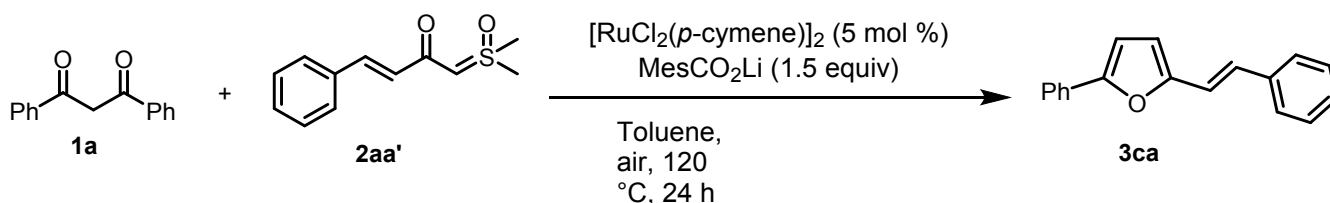

A dried 10 mL Schlenk tube was charged with **1,3-diphenylpropane-1,3-dione 1a** (22.4 mg, 0.1 mmol, 1 equiv), **(E)-1-(dimethyl(oxo)-λ<sup>6</sup>-sulfanylidene)-4-phenylbut-3-en-2-one 2aa'** (44.5mg, 0.2 mmol), **[RuCl<sub>2</sub>(p-cymene)]<sub>2</sub>** (3.1 mg, 0.005 mmol, 5 mol %), **MesCO<sub>2</sub>Li** (25.5 mg, 0.15 mmol, 1.5 equiv), and toluene (2 mL). The reaction mixture was heated to 120 °C for 24 hours under vigorous stirring. Upon completion, the reaction mixture was cooled to room temperature, diluted with ethyl acetate, and filtered through a pad of celite. The filtrate was concentrated under vacuum, and the resulting residue

was purified by preparative thin layer chromatography (PTLC) with hexane to give the corresponding products (**3ca**).

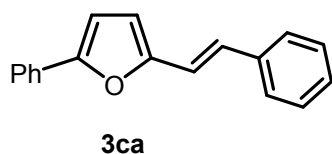

**(E)-2-phenyl-5-styrylfuran (3ca)** (6.7 mg, 27%) as a pale yellow solid. <sup>1</sup>H NMR (500 MHz, Chloroform-d) δ 7.77 – 7.71 (m, 2H), 7.50 (d, J = 7.3 Hz, 2H), 7.40 (t, J = 7.8 Hz, 2H), 7.36 (t, J = 7.7 Hz, 2H), 7.31 – 7.21 (m, 2H), 7.13 (d, J = 16.2 Hz, 1H), 6.92 (d, J = 16.3 Hz, 1H), 6.70 (d, J = 3.5 Hz, 1H), 6.44 (d, J = 3.5 Hz, 1H); <sup>13</sup>C NMR (126 MHz, Chloroform-d) δ 153.5, 152.8, 137.1, 130.6, 128.7, 127.5, 127.4, 126.9, 126.3, 123.8, 116.4, 111.1, 107.3; HRMS (ESI-TOF) m/z: calcd for C<sub>18</sub>H<sub>15</sub>O<sup>+</sup>: 247.1117 (M + H)<sup>+</sup>, found: 247.1115.

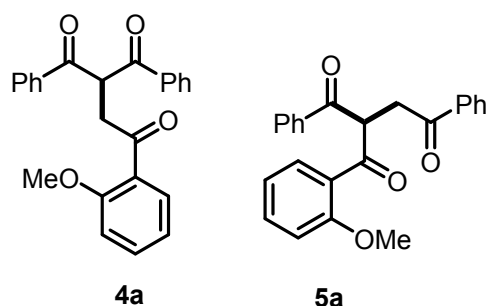

<sup>1</sup>H NMR (500 MHz, Chloroform-d) δ 8.10 – 8.05 (m, 2H), 8.05 – 7.98 (m, 3H), 7.96 – 7.90 (m, 2H), 7.62 – 7.55 (m, 3H), 7.53 – 7.42 (m, 6H), 7.02 (t, J = 7.6 Hz, 1H), 6.88 (d, J = 8.7 Hz, 1H), 6.18 – 6.09 (m, 1H), 4.03 – 3.97 (m, 1H), 3.86 (s, 0.5H), 3.80 (d, J = 6.4 Hz, 0.37H), 3.47 (s, 3H), 3.37 – 3.31 (m, 1H); <sup>13</sup>C NMR (126 MHz, Chloroform-d) δ 197.0, 196.8, 195.2, 158.6, 136.3, 135.6, 134.6, 133.3, 133.2, 131.5, 128.9, 128.8, 128.6, 128.6, 128.2, 125.6, 121.0, 111.4, 55.6, 54.9, 37.4; HRMS (ESI-TOF) m/z: calcd for C<sub>24</sub>H<sub>21</sub>O<sub>4</sub><sup>+</sup>: 373.1434 (M + H)<sup>+</sup>, found: 373.1436. (**4a**:**5a**=1:6)

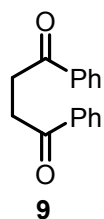

**1,4-diphenylbutane-1,4-dione<sup>5</sup> (9)** <sup>1</sup>H NMR (500 MHz, Chloroform-d) δ 8.07 – 8.03 (m, 4H), 7.61 – 7.56 (m, 2H), 7.49 (t, J = 7.7 Hz, 4H), 3.48 (s, 4H); <sup>13</sup>C NMR (126 MHz, Chloroform-d) δ 198.7, 136.7, 133.2, 128.6, 128.1, 32.6.

### 3.Procedure for Gram-Scale Experiment of 3aa

A dried 150 mL Schlenk tube was charged with **1,3-diphenylpropane-1,3-dione 1a** (1.0 g, 4.5 mmol, 1 equiv), **2-(dimethyl(oxo)-λ<sup>6</sup>-sulfanylidene)-1-(2-methoxyphenyl)ethan-1-one 2a** (2.0 g, 9.0 mmol, 2

equiv),  $[\text{RuCl}_2(p\text{-Cymene})]_2$  (137.8 mg, 0.225 mmol, 5 mol %),  $\text{MesCO}_2\text{Li}$  (1.1 g, 6.75 mmol, 1.5 equiv), and toluene (90 mL). The reaction mixture was heated to 120 °C for 48 hours under vigorous stirring. Upon completion, the reaction mixture was cooled to room temperature, diluted with ethyl acetate, and filtered through a pad of celite. The filtrate was concentrated under vacuum, and the resulting residue was purified by preparative thin layer chromatography (PTLC) with hexane to give the corresponding products **2-(2-methoxyphenyl)-5-phenylfuran (3aa)** (0.686 g, 61%) as a white solid.

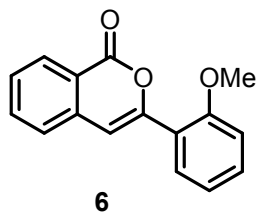

**3-(2-methoxyphenyl)-1H-isochromen-1-one (6)** (147.6 mg 13%) was also isolated as a yellow solid.  $^1\text{H}$  NMR (500 MHz, Chloroform- $d$ )  $\delta$  8.31 (d,  $J = 7.9$  Hz, 1H), 8.01 – 7.96 (m, 1H), 7.75 – 7.67 (m, 1H), 7.53 – 7.46 (m, 2H), 7.41 – 7.37 (m, 2H), 7.08 (t,  $J = 7.6$  Hz, 1H), 7.02 (d,  $J = 8.3$  Hz, 1H), 3.97 (s, 3H).  $^{13}\text{C}$  NMR (126 MHz, Chloroform- $d$ )  $\delta$  162.7, 157.1, 150.4, 138.0, 134.6, 130.7, 129.4, 128.8, 128.0, 126.3, 120.8, 120.7, 120.6, 111.3, 107.0, 55.6; HRMS (ESI-TOF)  $m/z$ : calcd for  $\text{C}_{16}\text{H}_{13}\text{O}_3^+$ : 253.0859 ( $\text{M} + \text{H}$ ) $^+$ , found: 253.0857.

#### 4.Procedure for Gram-Scale Experiment of 3ad

A dried 150 mL Schlenk tube was charged with **1,3-bis(4-fluorophenyl)propane-1,3-dione 1d** (1.3 g, 5.0 mmol, 1 equiv), **2-(dimethyl(oxo)- $\lambda^6$ -sulfanylidene)-1-(2-methoxyphenyl)ethan-1-one 2a** (2.3 g, 10.0 mmol, 2 equiv),  $[\text{RuCl}_2(p\text{-Cymene})]_2$  (153.1 mg, 0.25 mmol, 5 mol %),  $\text{MesCO}_2\text{Li}$  (1.3g, 7.5 mmol, 1.5 equiv), and toluene (100 mL). The reaction mixture was heated to 120 °C for 48 hours under vigorous stirring. Upon completion, the reaction mixture was cooled to room temperature, diluted with ethyl acetate, and filtered through a pad of celite. The filtrate was concentrated under vacuum, and the resulting residue was purified by preparative thin layer chromatography (PTLC) with hexane to give the corresponding products **2-(4-fluorophenyl)-5-(2-methoxyphenyl)furan (3ad)** (0.890 g, 66%) as a white solid.

## 5. X-Ray Crystallographic Data of 3ak

Crystal structure and data of 2-(2-methoxyphenyl)-5-(3-(trifluoromethyl)phenyl)furan (**3ak**) (CCDC 1918495, Displacement ellipsoids are drawn at the 50% probability level.)

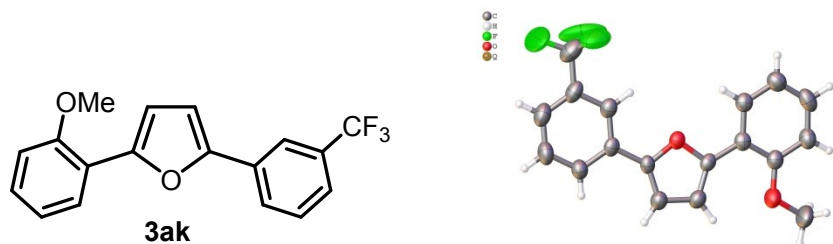

**Table S3 Crystal data and structure refinement for 3ak.**

|                                           |                                                               |
|-------------------------------------------|---------------------------------------------------------------|
| Empirical formula                         | C <sub>18</sub> H <sub>13</sub> F <sub>3</sub> O <sub>2</sub> |
| Formula weight                            | 318.28                                                        |
| Temperature/K                             | 295.5(2)                                                      |
| Crystal system                            | monoclinic                                                    |
| Space group                               | P2 <sub>1</sub> /n                                            |
| a/Å                                       | 9.501(3)                                                      |
| b/Å                                       | 16.731(5)                                                     |
| c/Å                                       | 9.633(2)                                                      |
| α/°                                       | 90.00                                                         |
| β/°                                       | 99.37(3)                                                      |
| γ/°                                       | 90.00                                                         |
| Volume/Å <sup>3</sup>                     | 1510.8(7)                                                     |
| Z                                         | 4                                                             |
| ρ <sub>calc</sub> /cm <sup>3</sup>        | 1.346                                                         |
| μ/mm <sup>-1</sup>                        | 0.112                                                         |
| F(000)                                    | 632.0                                                         |
| Crystal size/mm <sup>3</sup>              | 0.12 × 0.11 × 0.1                                             |
| Radiation                                 | MoKα (λ = 0.71073)                                            |
| 2θ range for data collection/°            | 7.42 to 50                                                    |
| Index ranges                              | -10 ≤ h ≤ 11, -19 ≤ k ≤ 19, -11 ≤ l ≤ 11                      |
| Reflections collected                     | 8734                                                          |
| Independent reflections                   | 2659 [R <sub>int</sub> = 0.1477, R <sub>sigma</sub> = 0.1036] |
| Data/restraints/parameters                | 2659/34/237                                                   |
| Goodness-of-fit on F <sup>2</sup>         | 0.971                                                         |
| Final R indexes [I ≥ 2σ (I)]              | R <sub>1</sub> = 0.0932, wR <sub>2</sub> = 0.2108             |
| Final R indexes [all data]                | R <sub>1</sub> = 0.1319, wR <sub>2</sub> = 0.2718             |
| Largest diff. peak/hole/e Å <sup>-3</sup> | 0.43/-0.64                                                    |

## Reference

- 1 (a) R. M. P. Dias and A. C. B. Burtoloso, *Org. Lett.*, 2016, **18**, 3034; (b) A. M. Phelps, V. S. Chan, J. G. Napolitano, S. W. Krabbe, J. M. Schomaker and S. Shekhar, *J. Org. Chem.*, 2016, **81**, 4158; (c) M. Barday, C. Janot, N. R. Halcovitch, J. Muir and C. Aissa, *Angew. Chem. Int. Ed.*, 2017, **56**, 13117.
- 2 S.-S. Zhang, J.-Q. Wu, Y.-X. Lao, X.-G. Liu, Y. Liu, W.-X. Lv, D.-H. Tan, Y.-F. Zeng and H. Wang, *Org. Lett.*, 2014, **16**, 6412.
- 3 A. G. Talero, B. S. Martins and A. C. B. Burtoloso, *Org. Lett.*, 2018, **20**, 7206.
- 4 D. Lim, F. Fang, G. Zhou and D. M. Coltart, *Org. Lett.*, 2007, **9**, 4139.
- 5 Y. Peng, L. Luo, C.-S. Yan, J.-J. Zhang and Y.-W. Wang, *J. Org. Chem.*, 2013, **78**, 10960.



## 6. <sup>1</sup>H and <sup>13</sup>C NMR Spectra

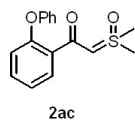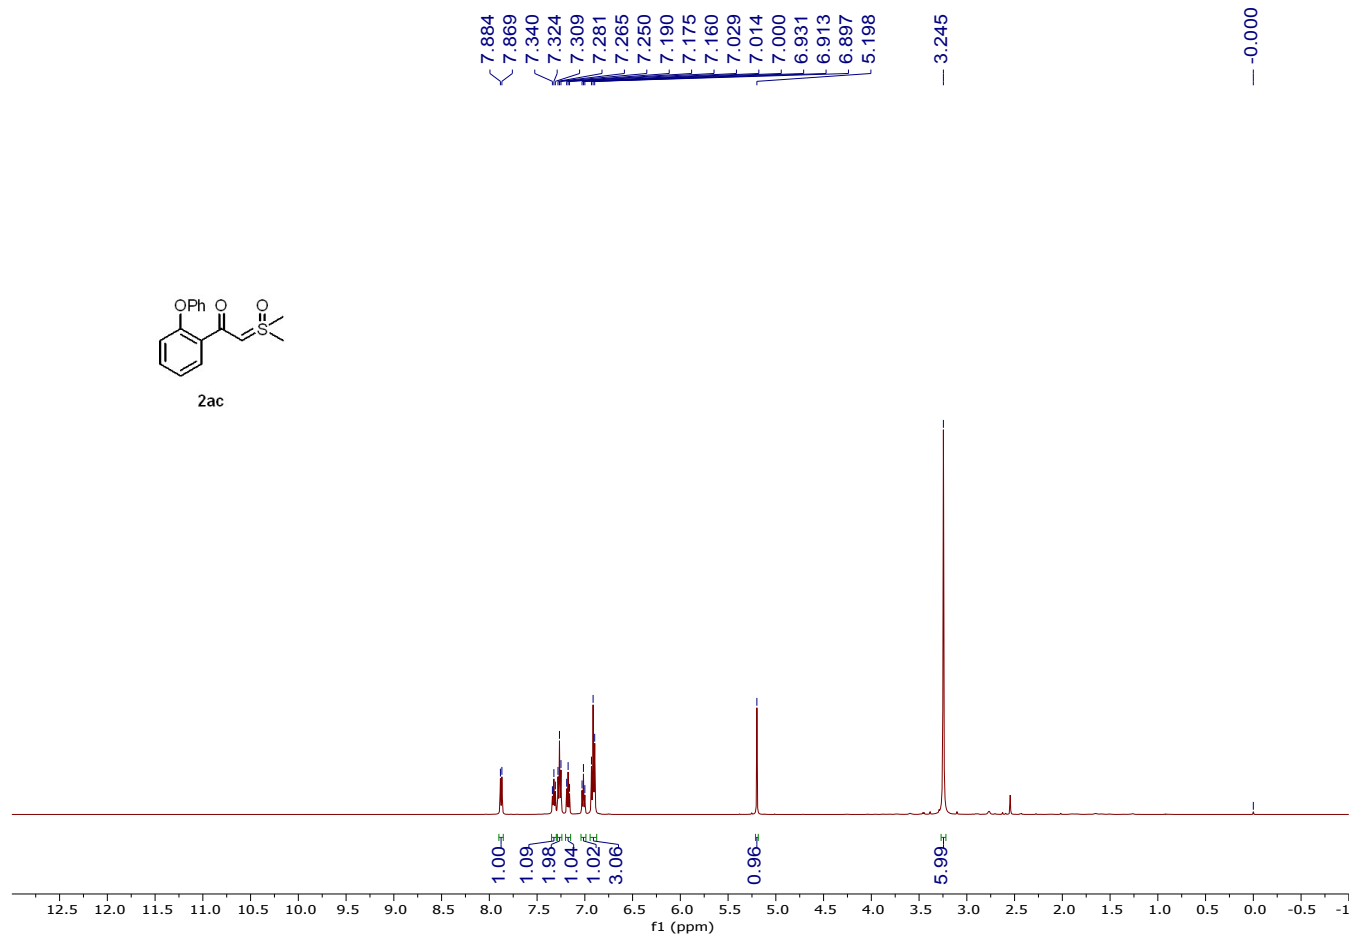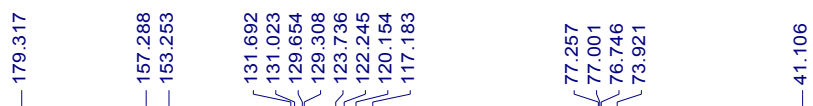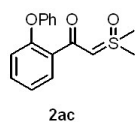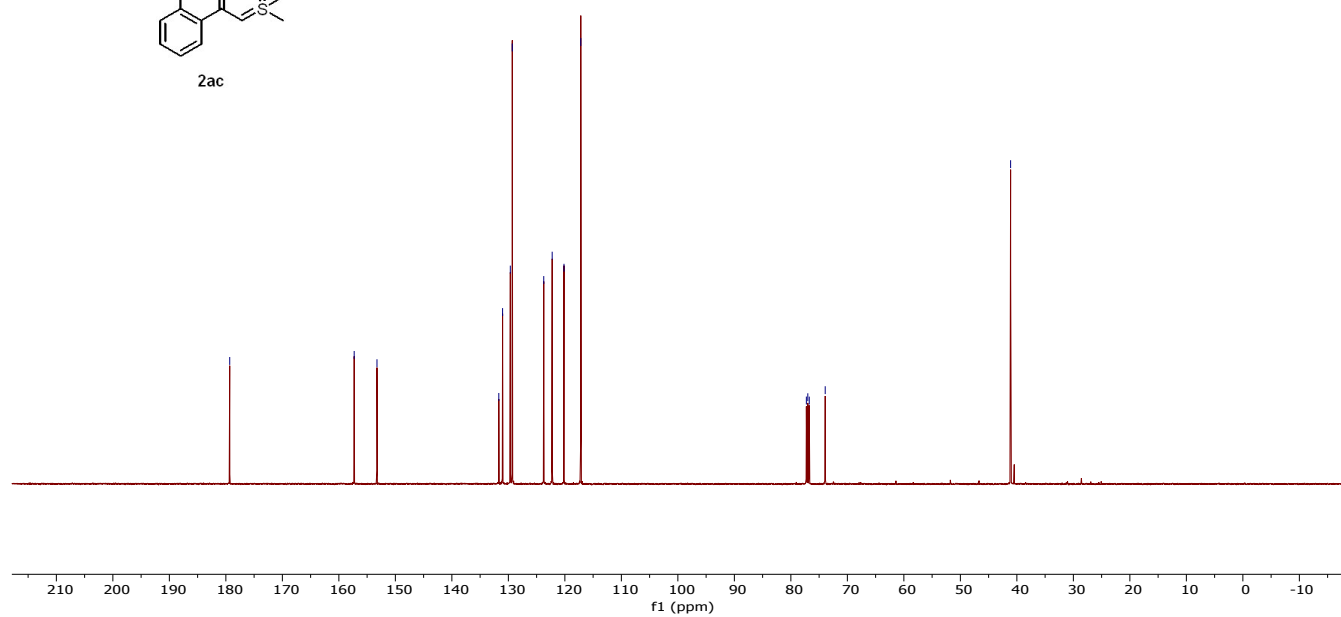

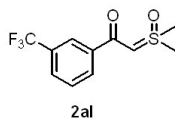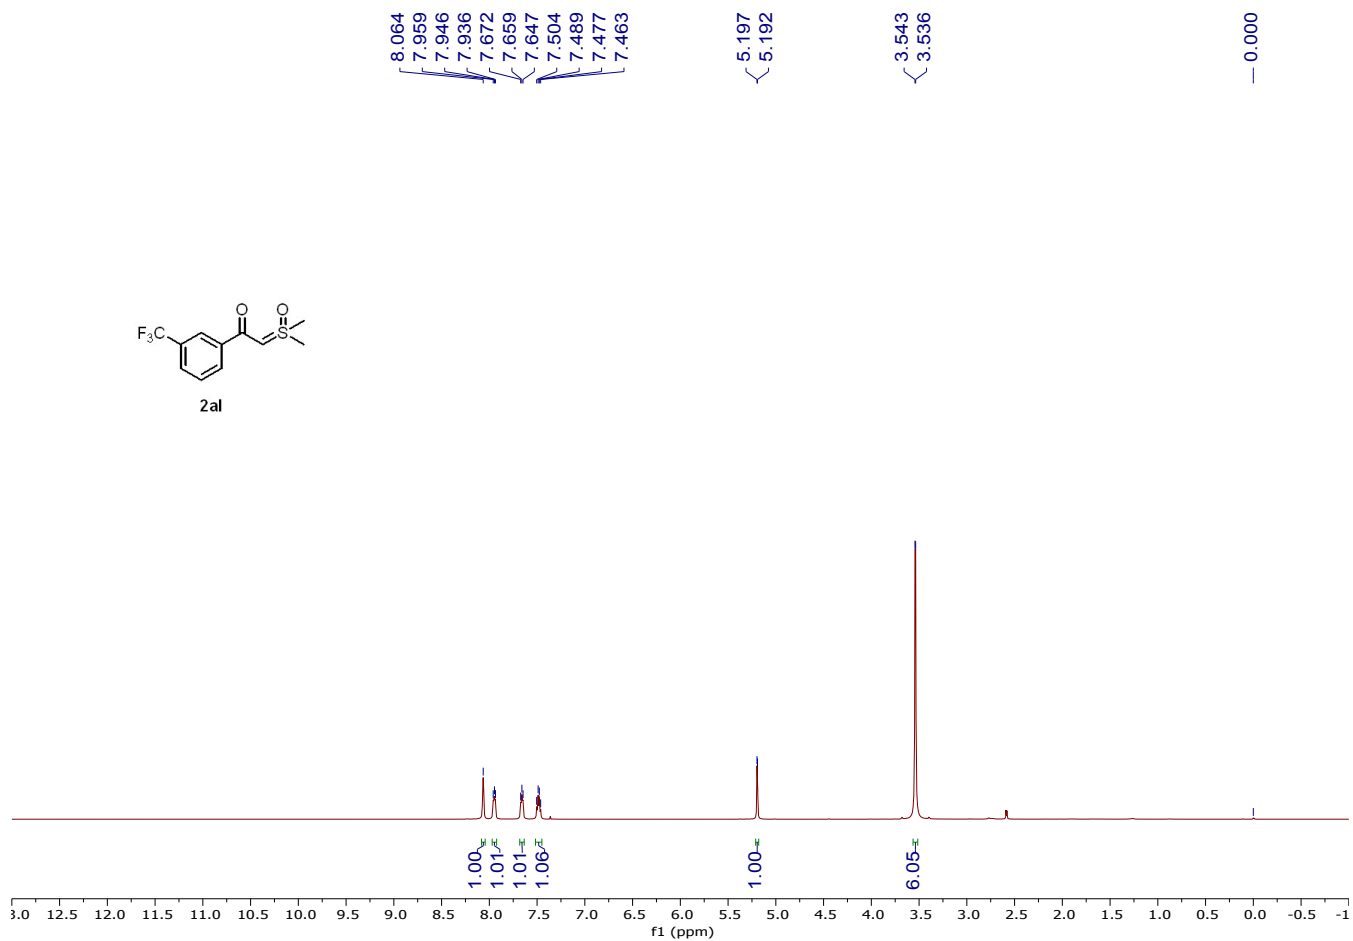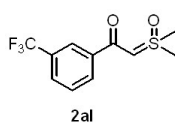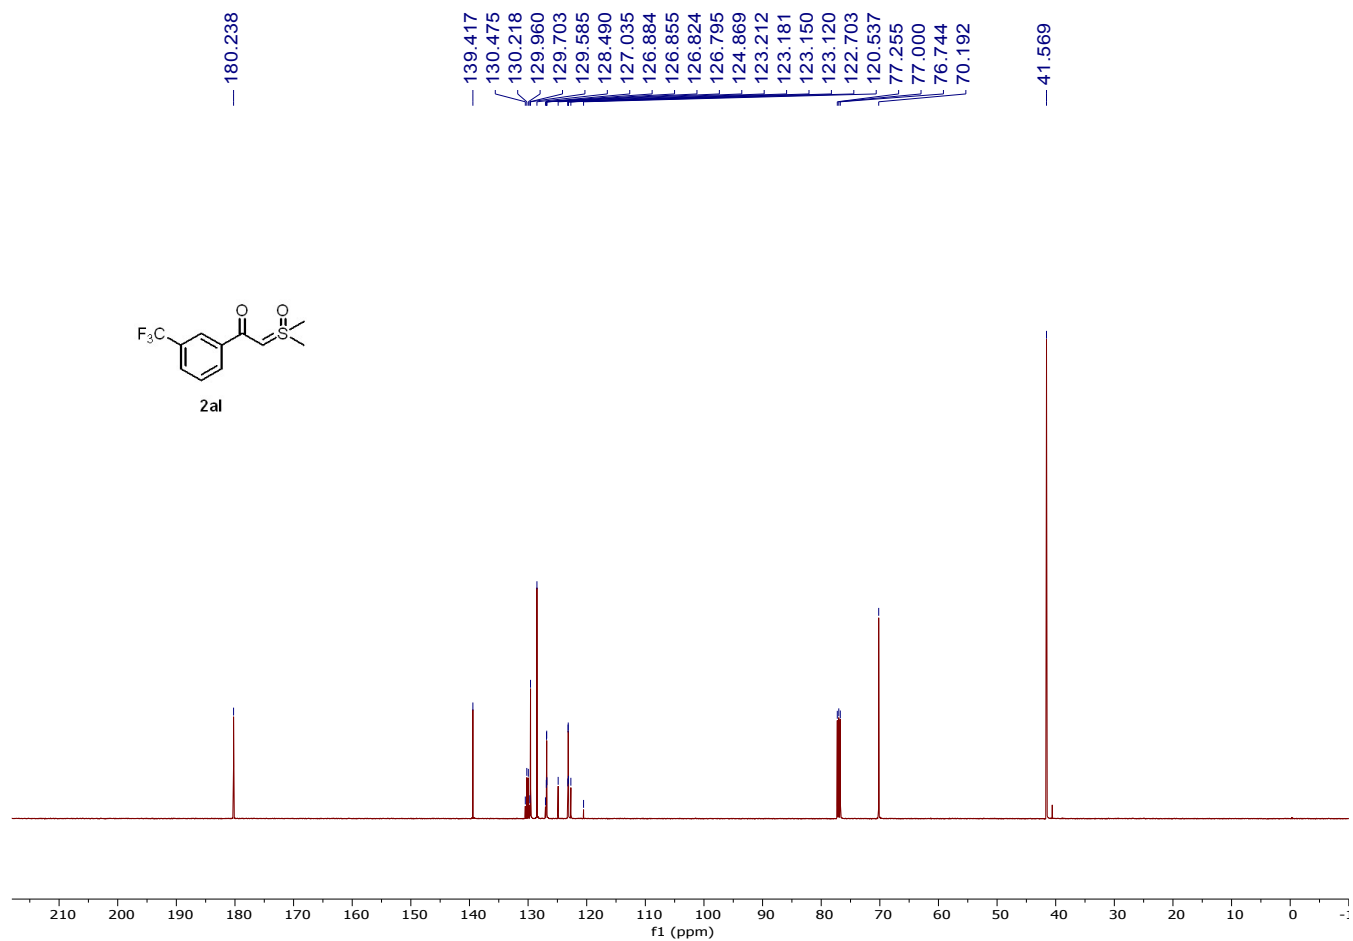

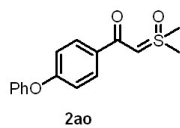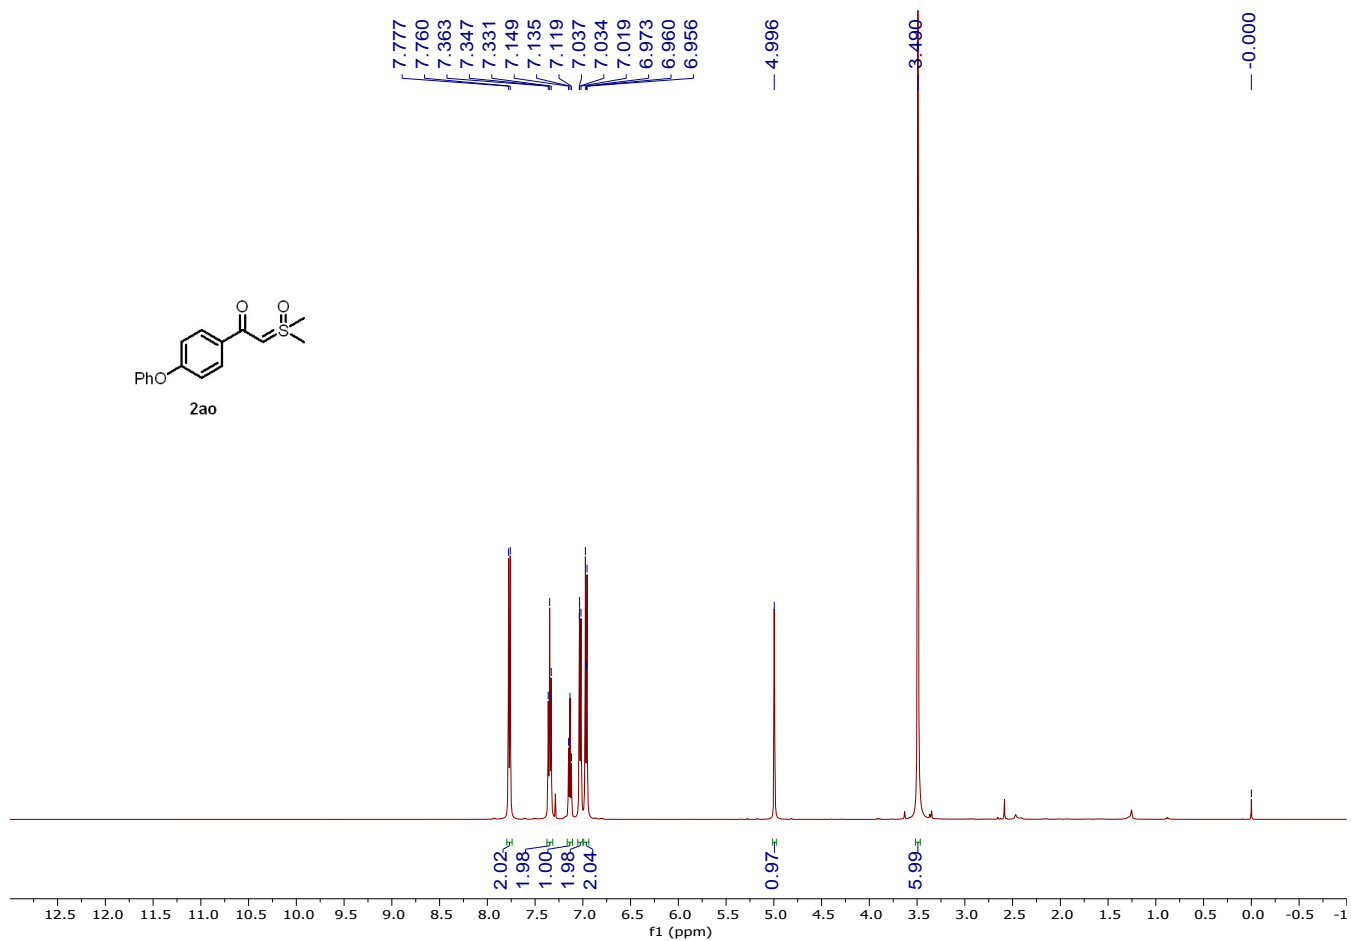

181.332, 159.538, 156.116, 133.505, 129.713, 128.250, 123.729, 119.353, 117.463, 77.254, 76.999, 76.745, 68.150, 42.126

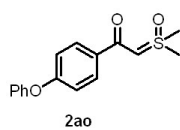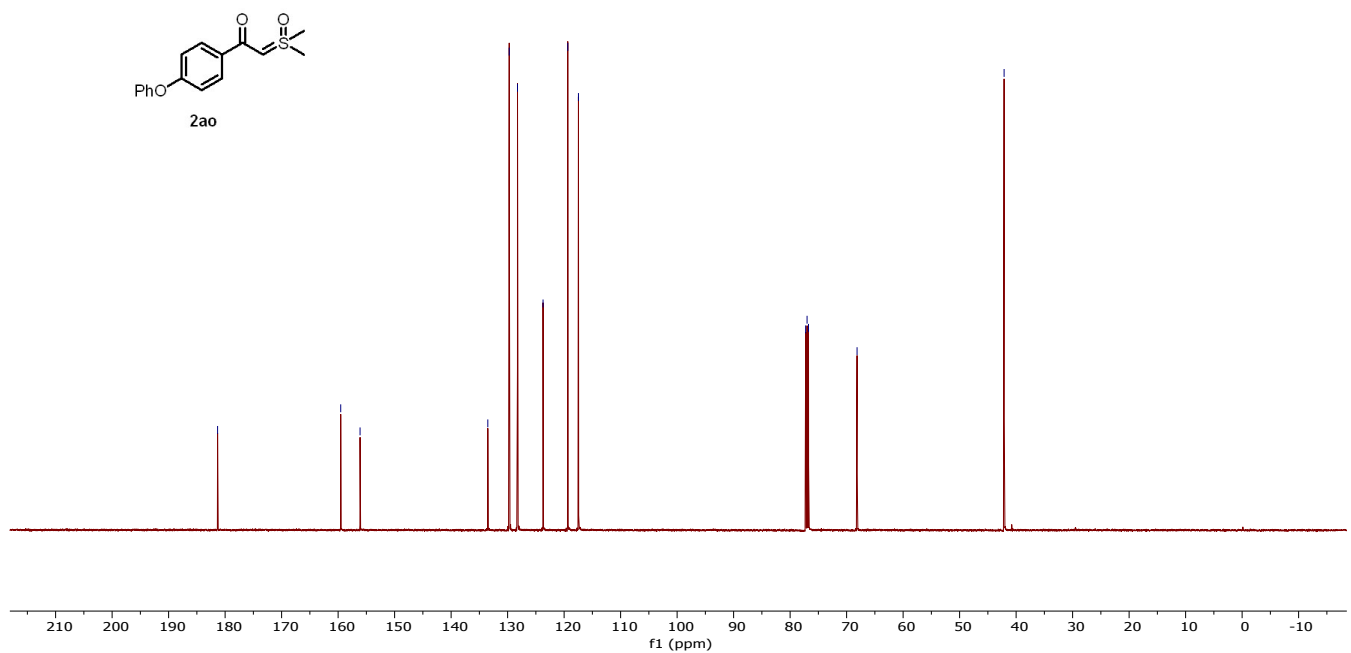

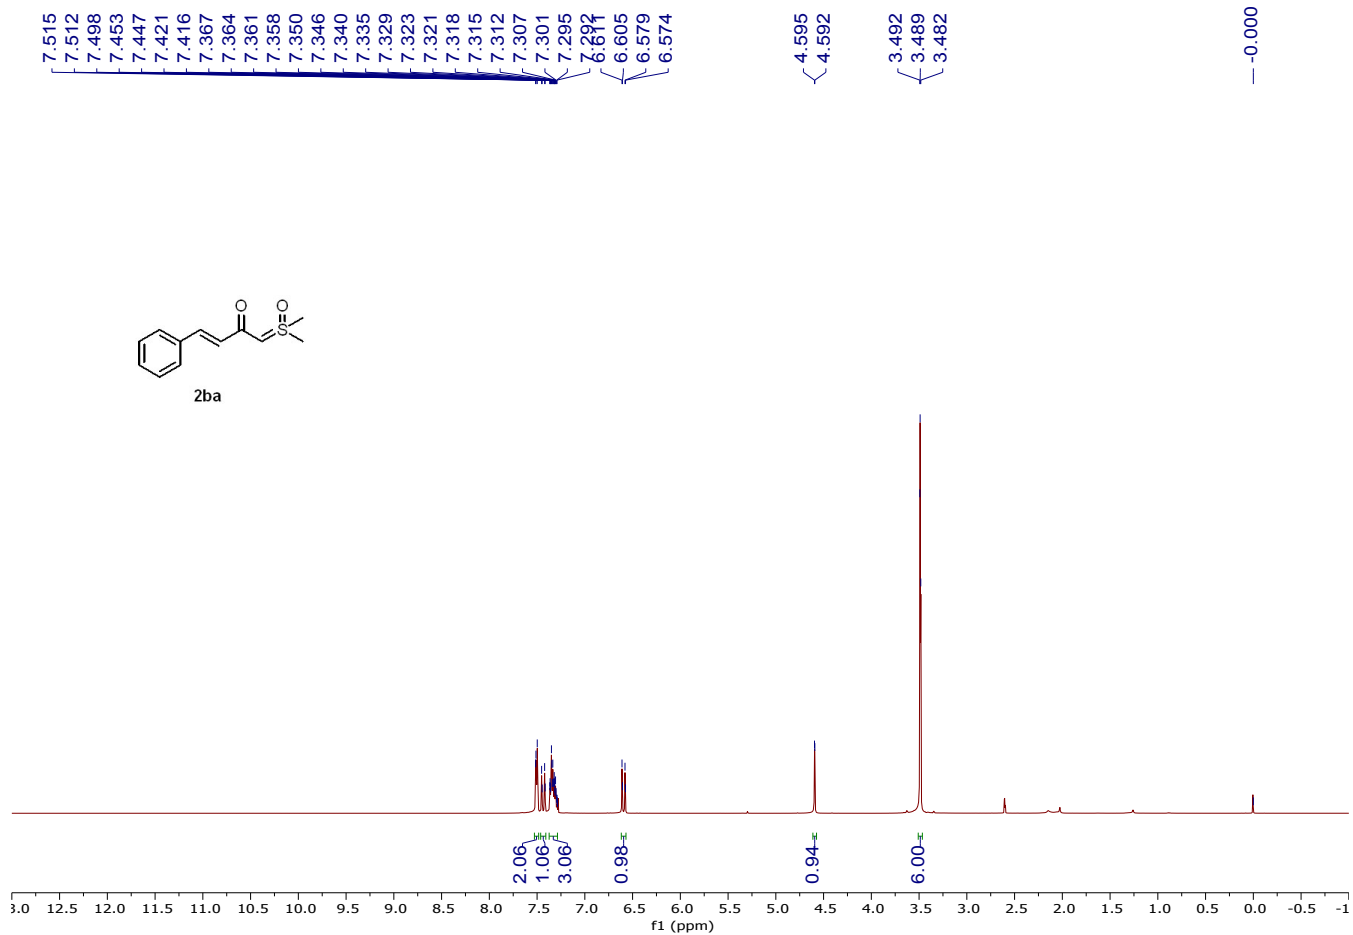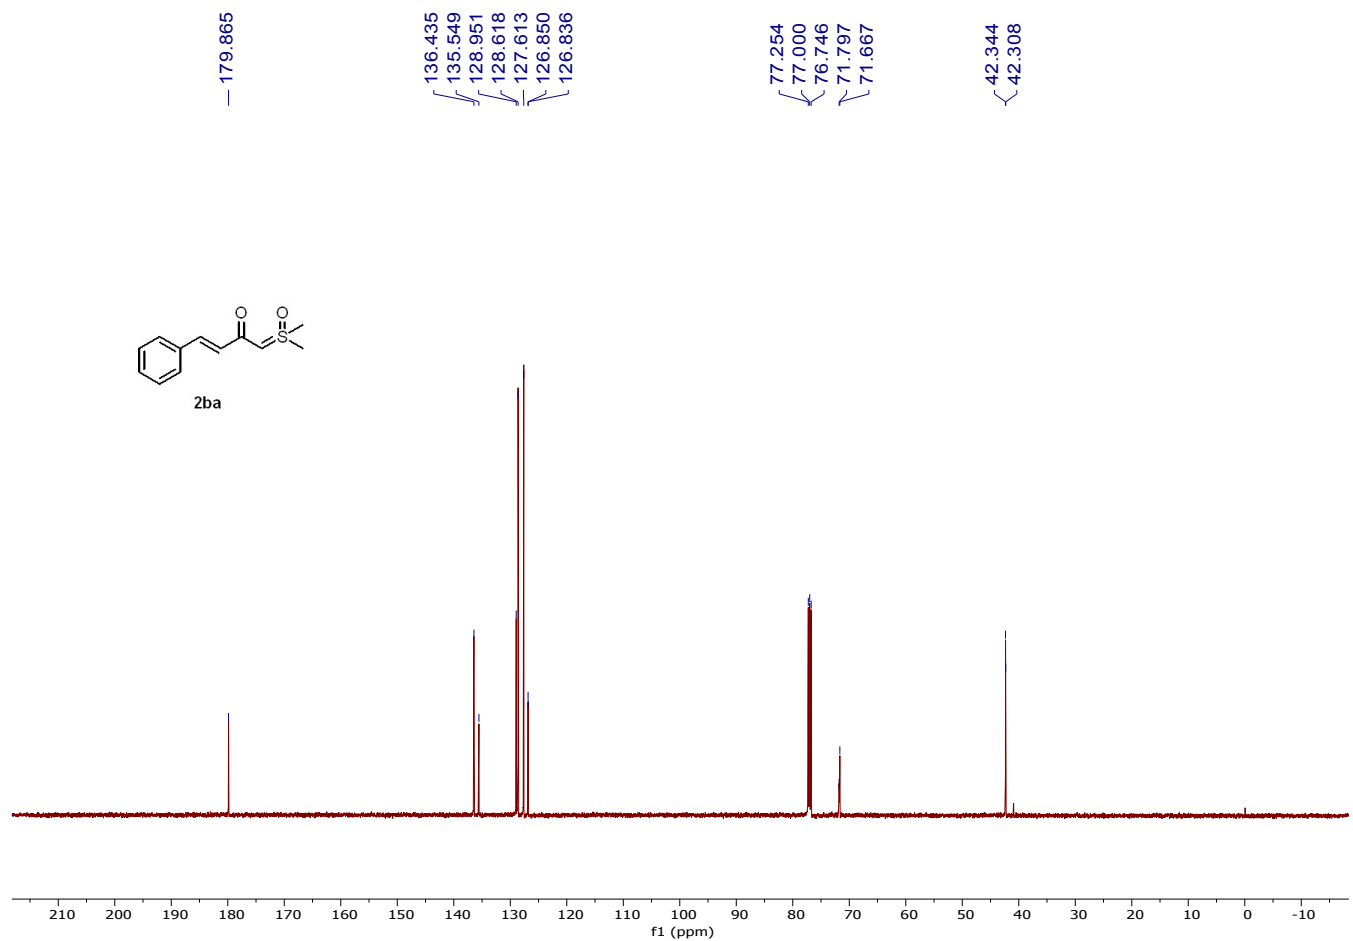

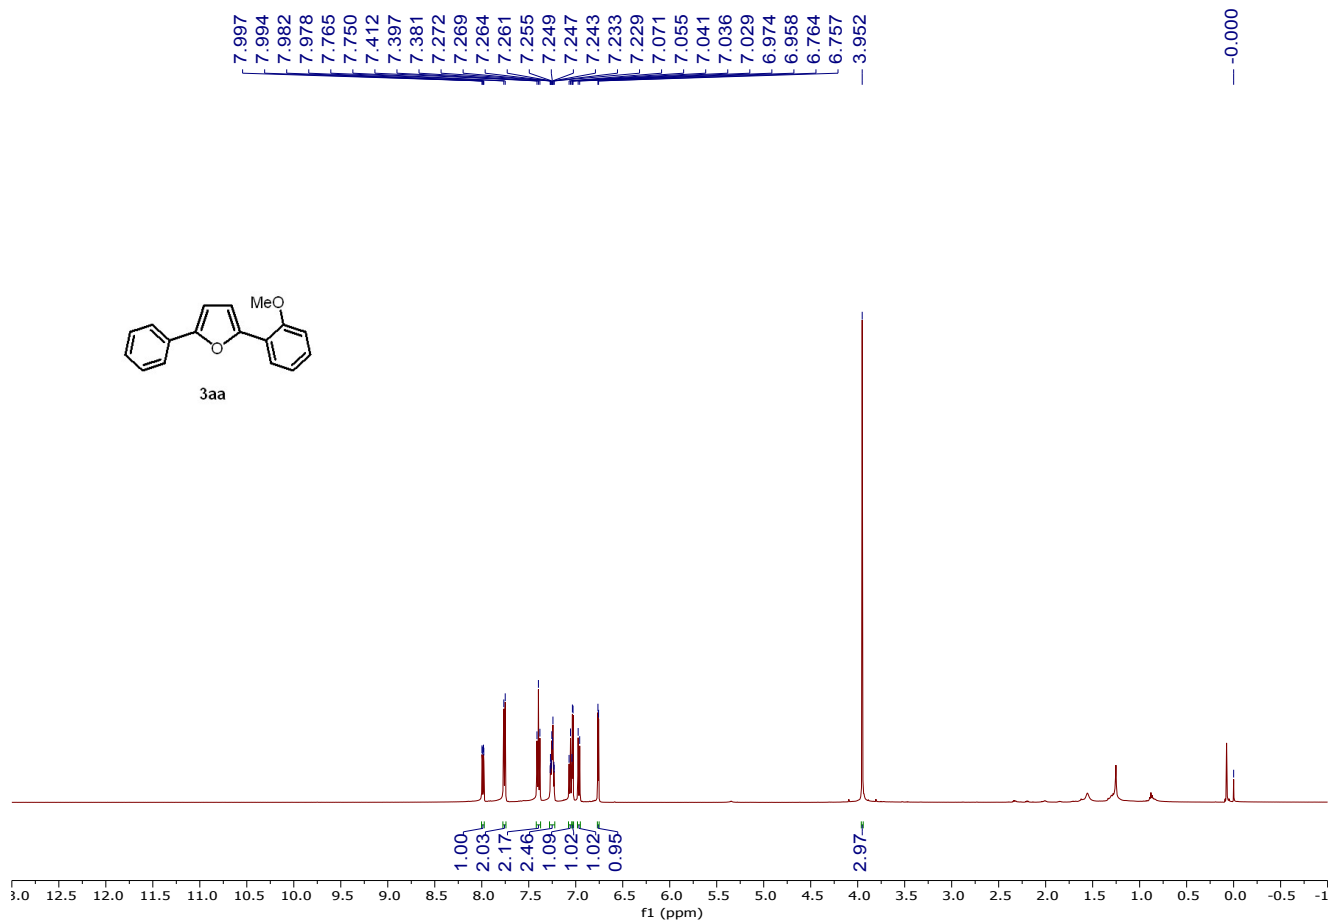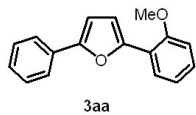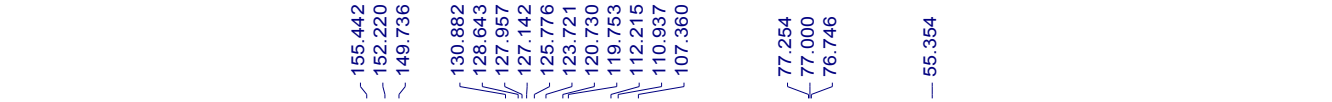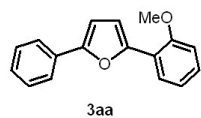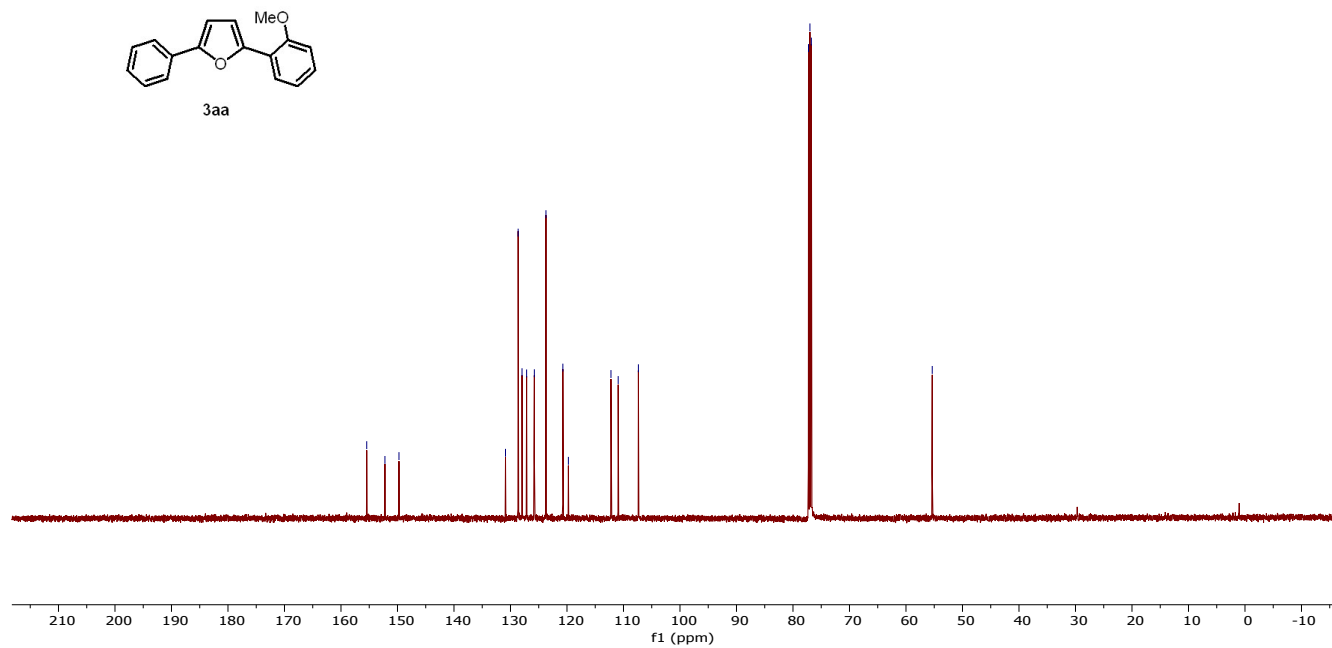

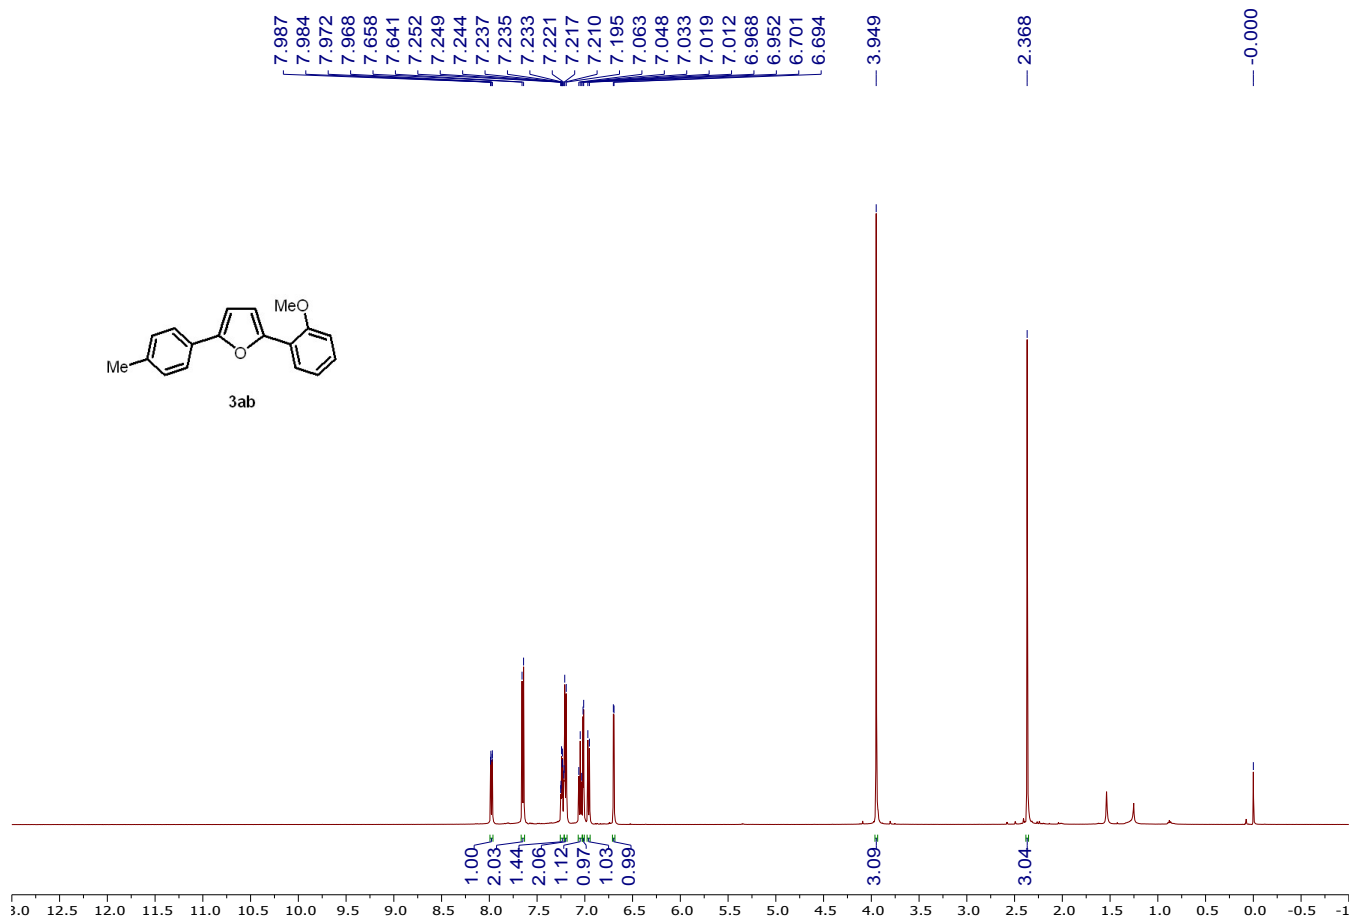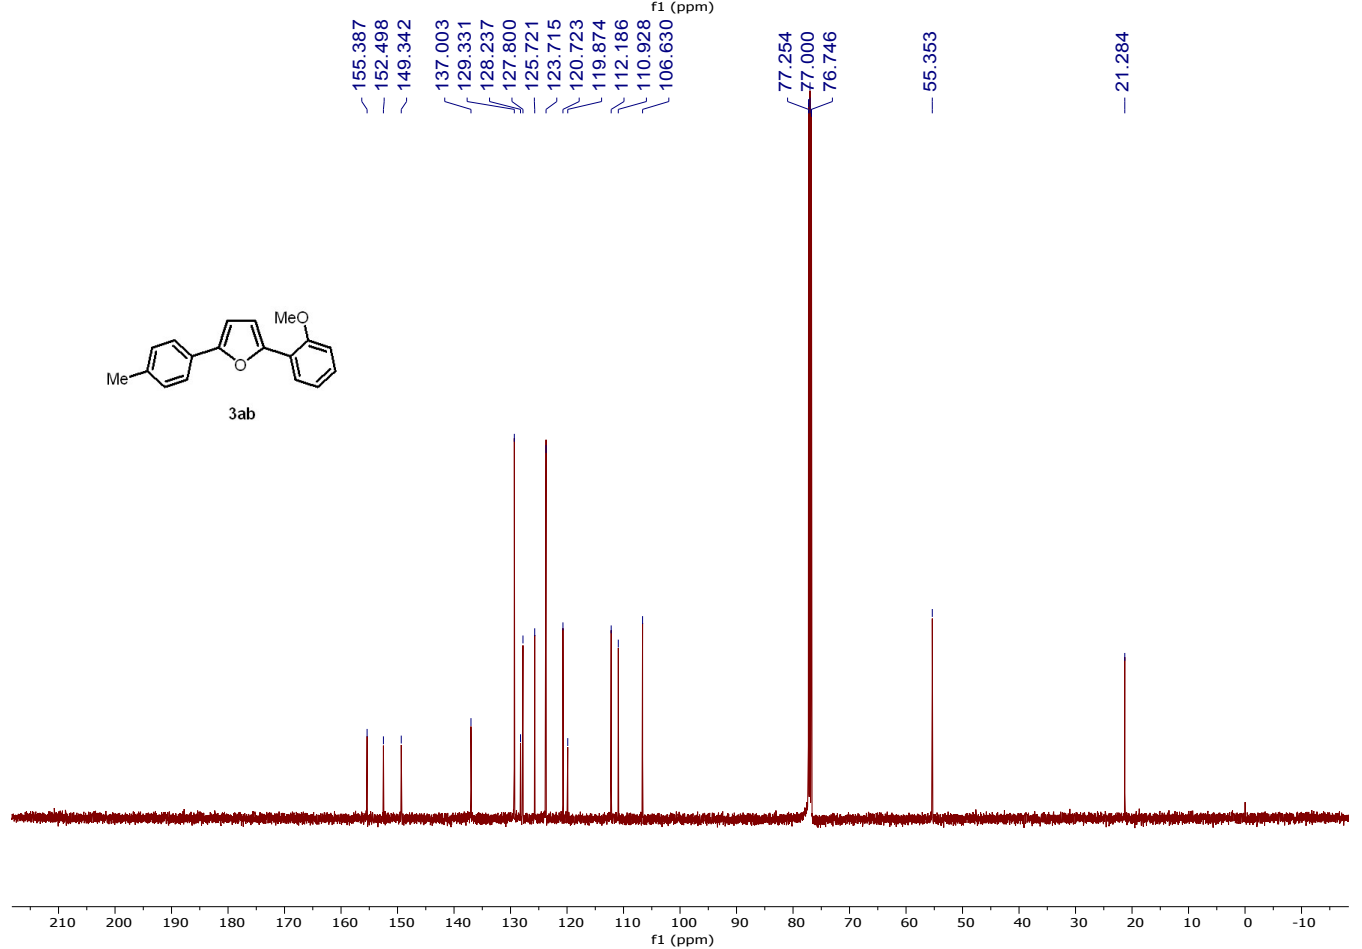

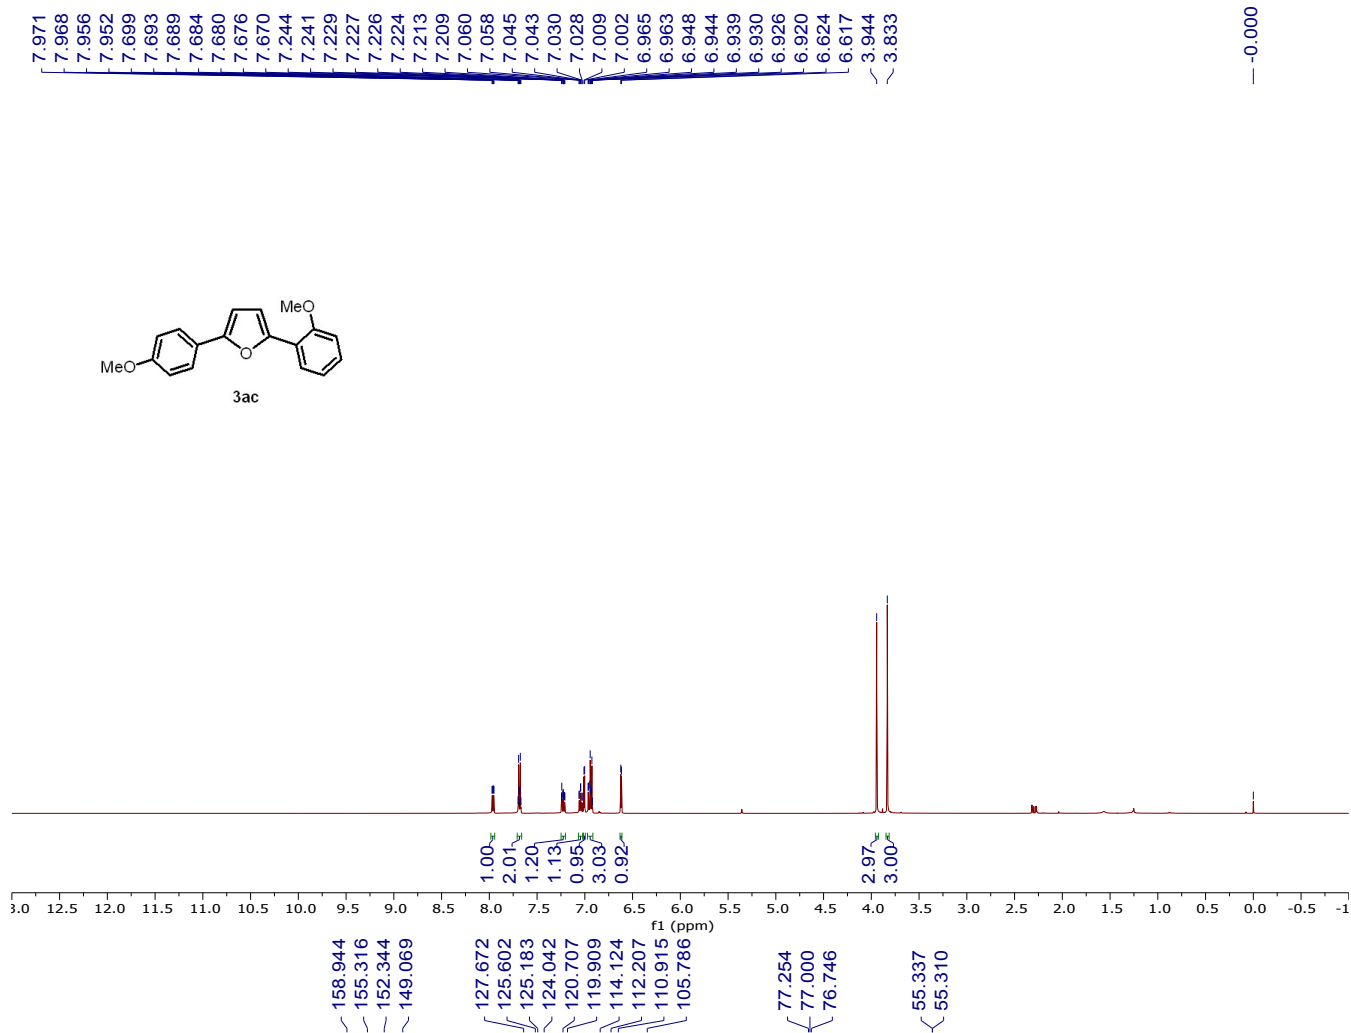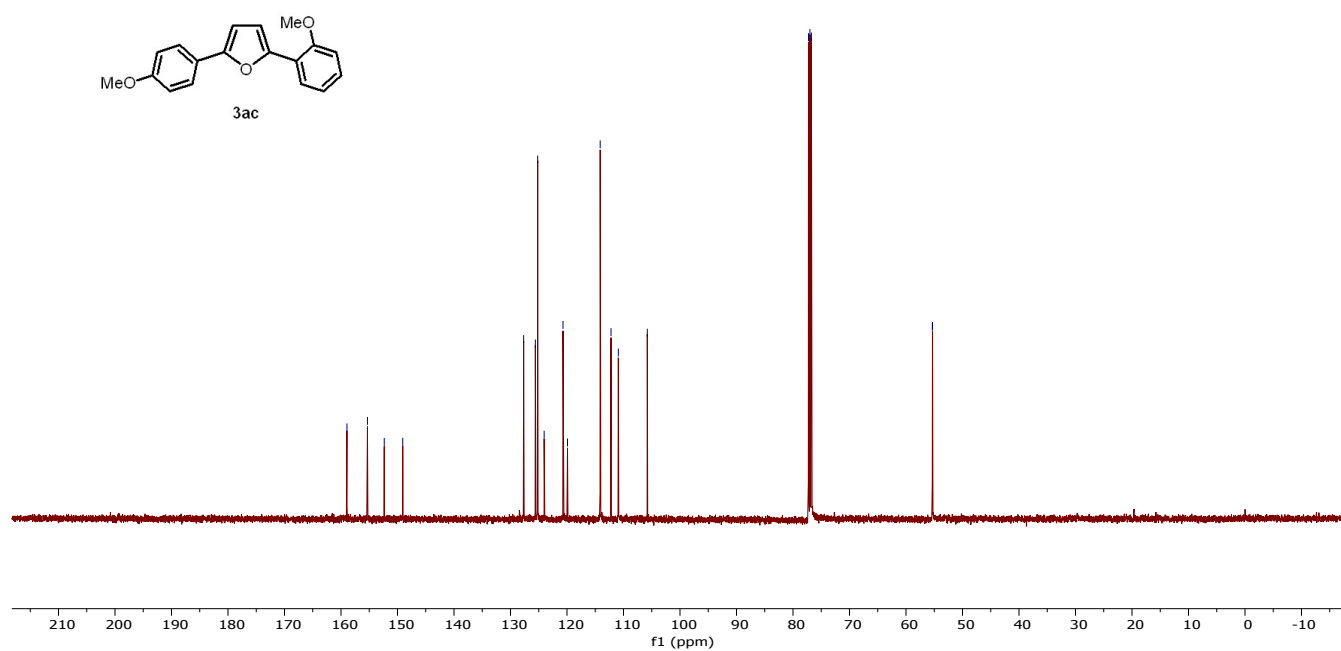

7.961  
7.957  
7.945  
7.942  
7.723  
7.719  
7.712  
7.709  
7.705  
7.699  
7.695  
7.263  
7.260  
7.248  
7.247  
7.245  
7.242  
7.232  
7.228  
7.103  
7.099  
7.090  
7.085  
7.082  
7.079  
7.072  
7.068  
7.062  
7.049  
7.047  
7.034  
7.032  
7.016  
7.009  
6.971  
6.954  
6.684  
6.877

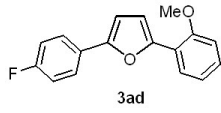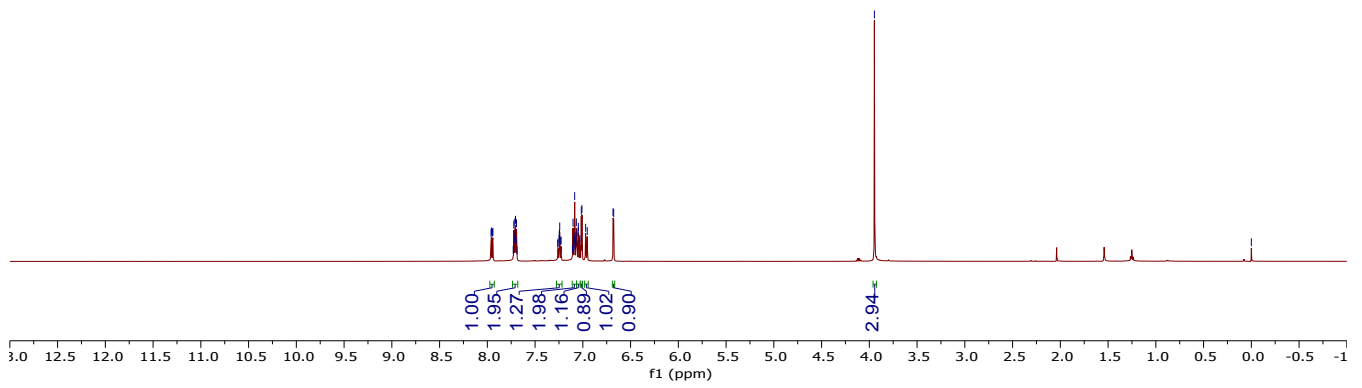

163.009  
161.046  
155.445  
151.393  
149.765  
128.016  
127.299  
127.274  
125.714  
125.461  
125.399  
120.727  
119.659  
115.753  
115.578  
112.205  
110.965  
107.010  
106.996  
77.254  
77.000  
76.746  
55.351

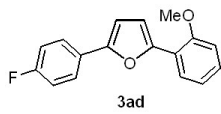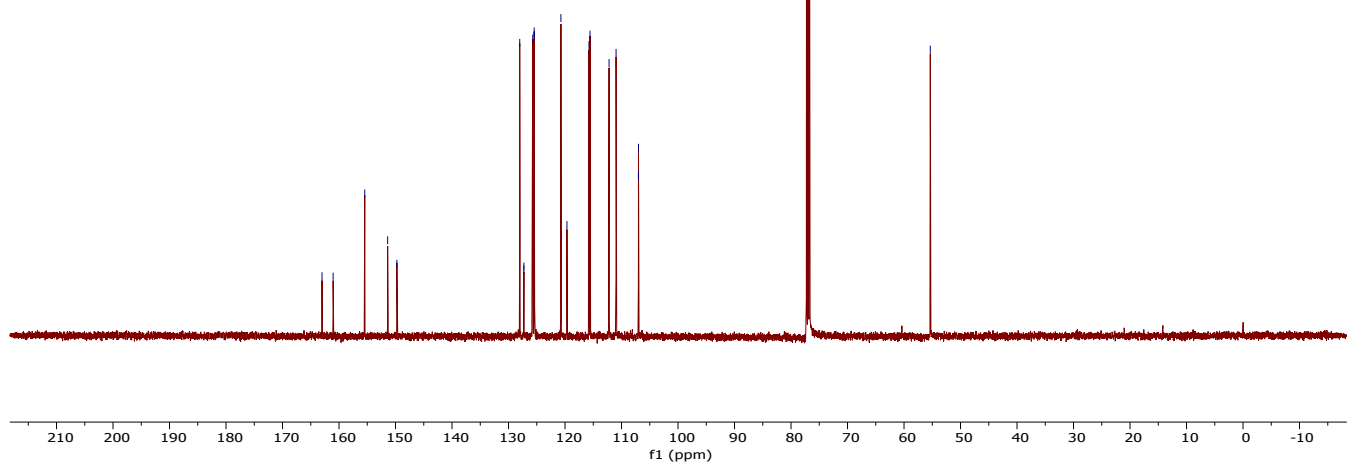

-0.000



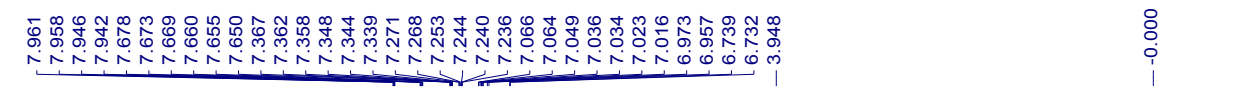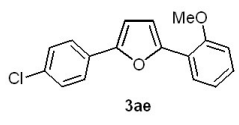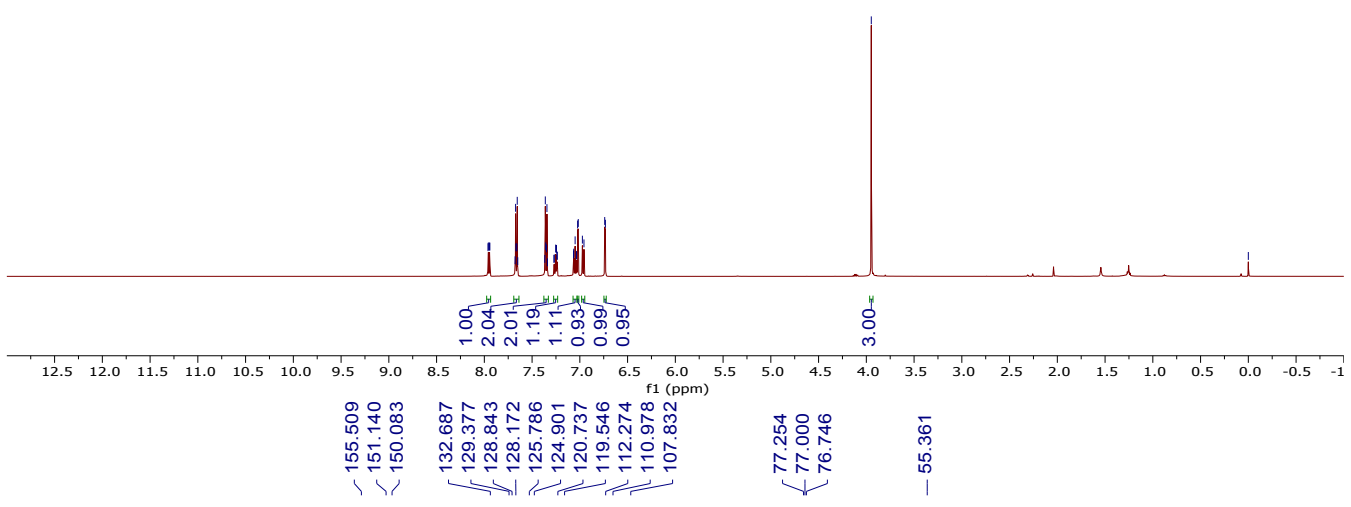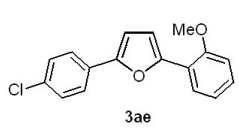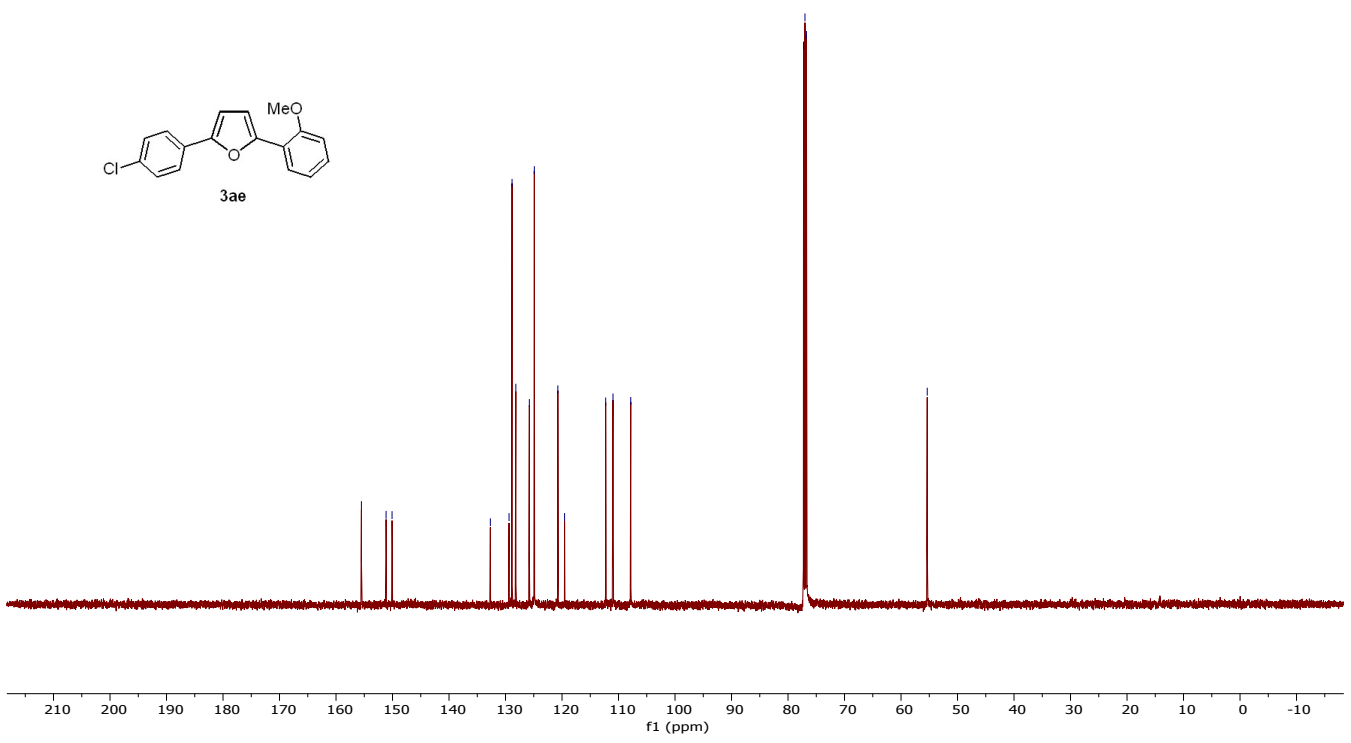

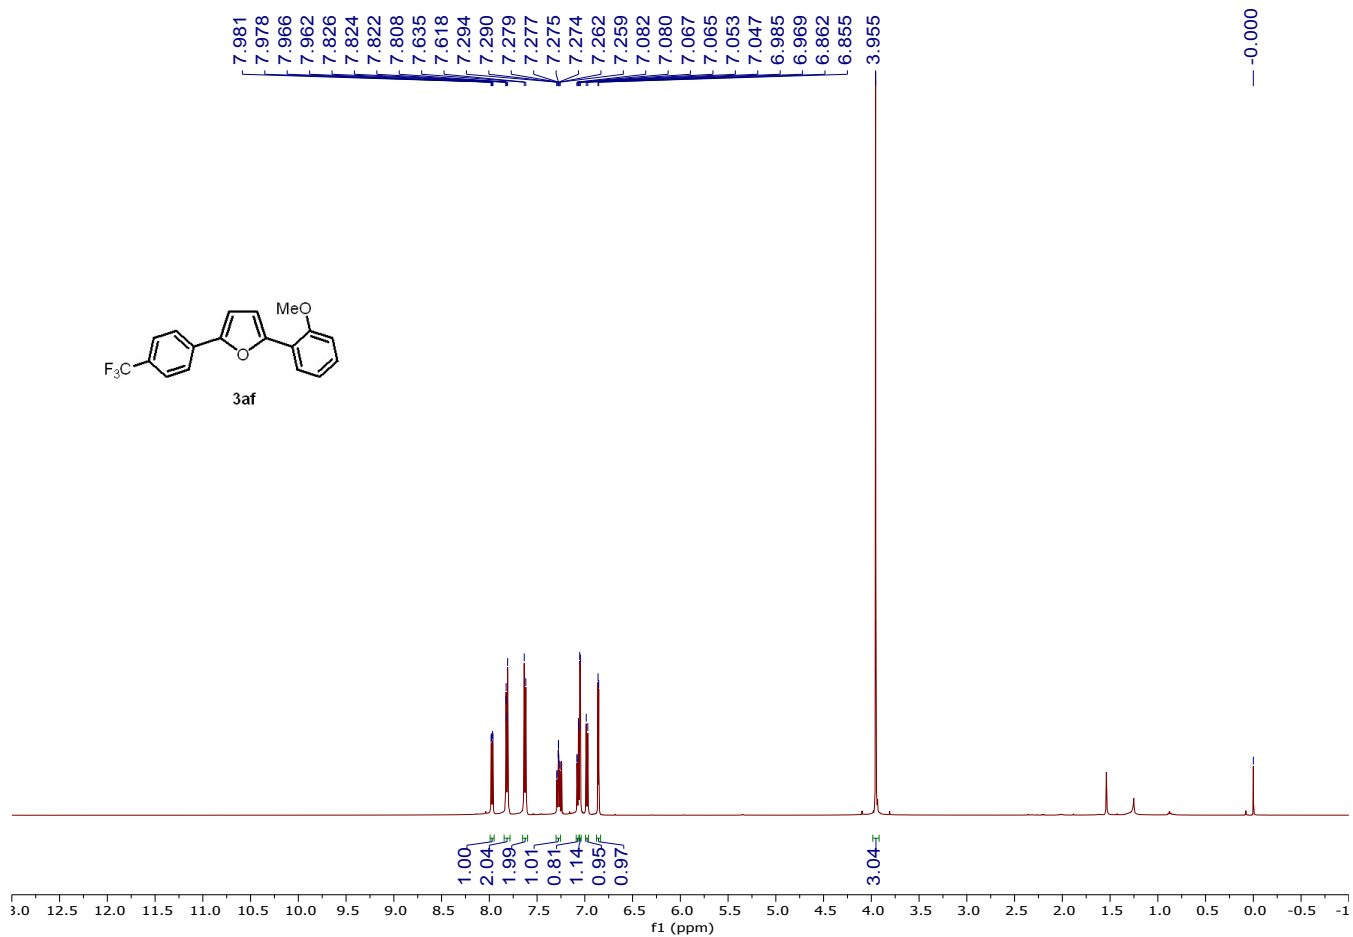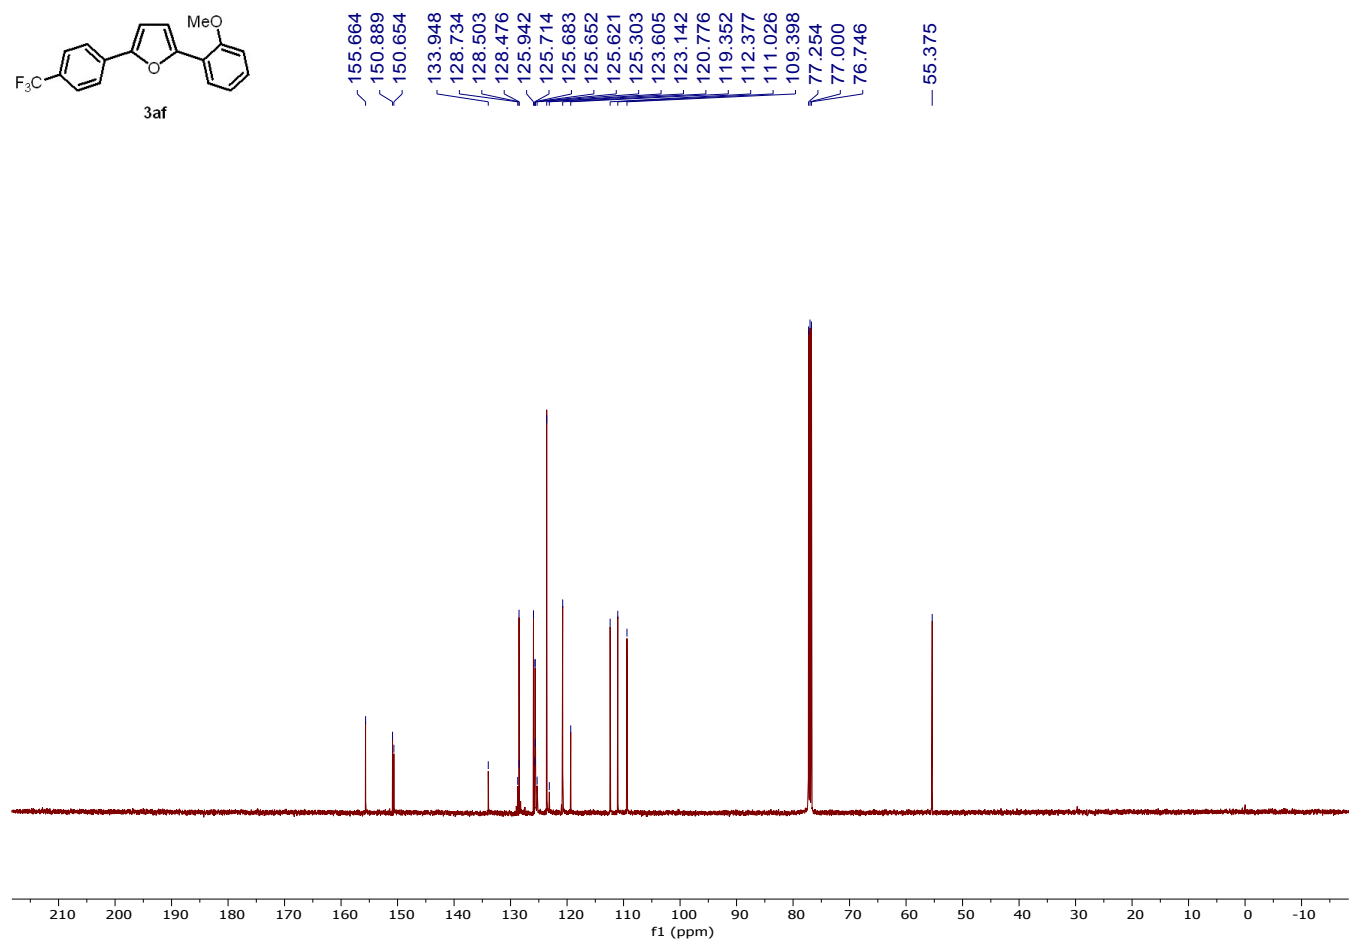

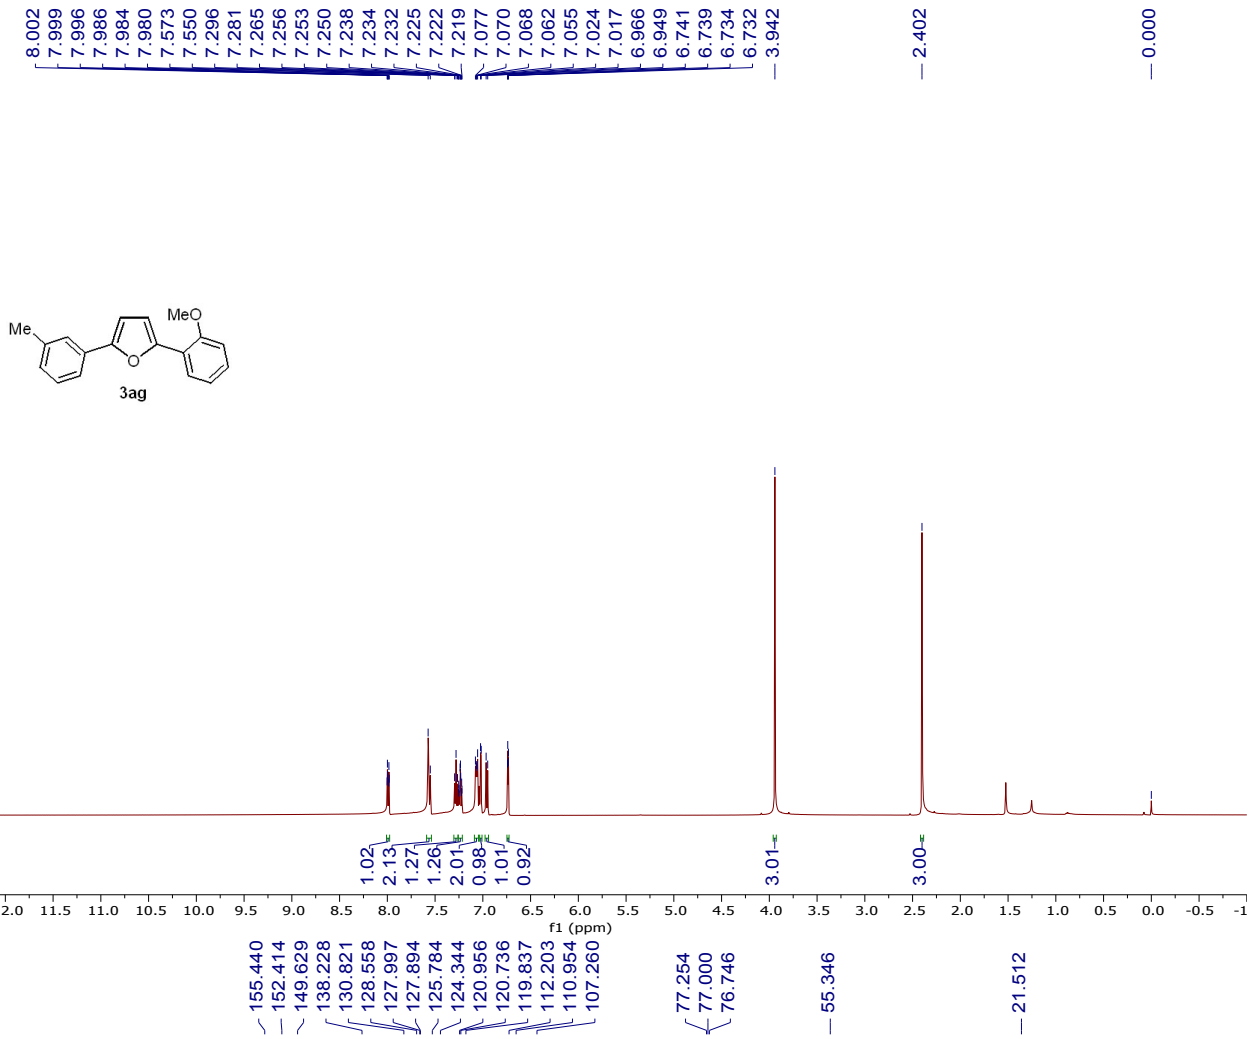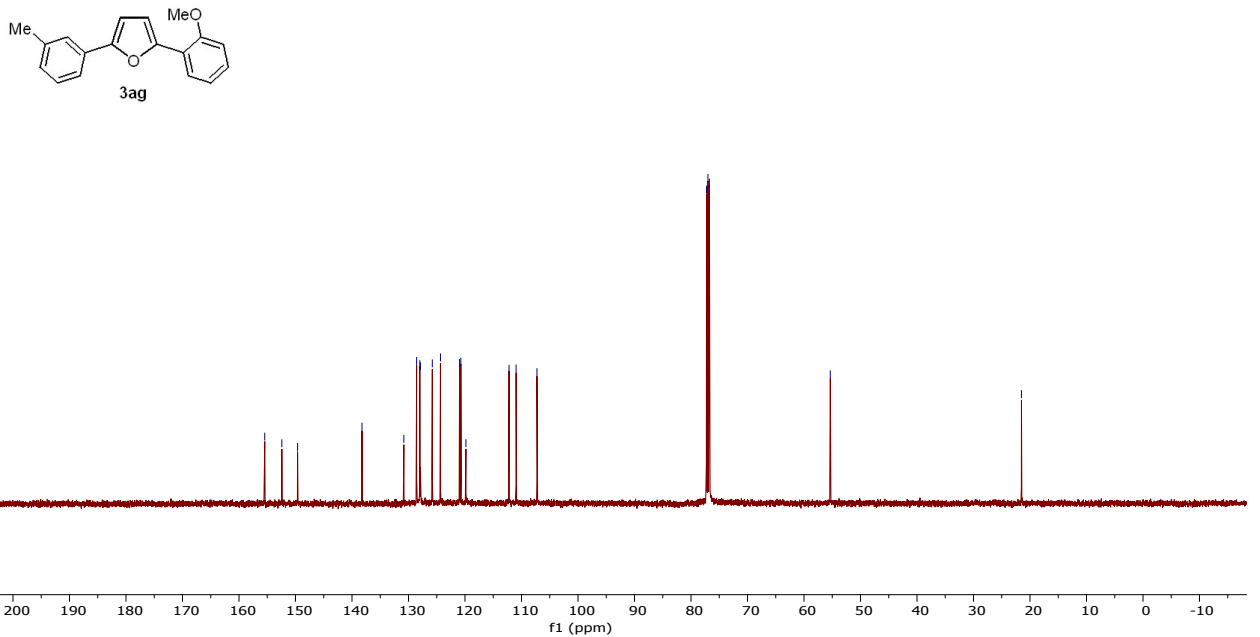

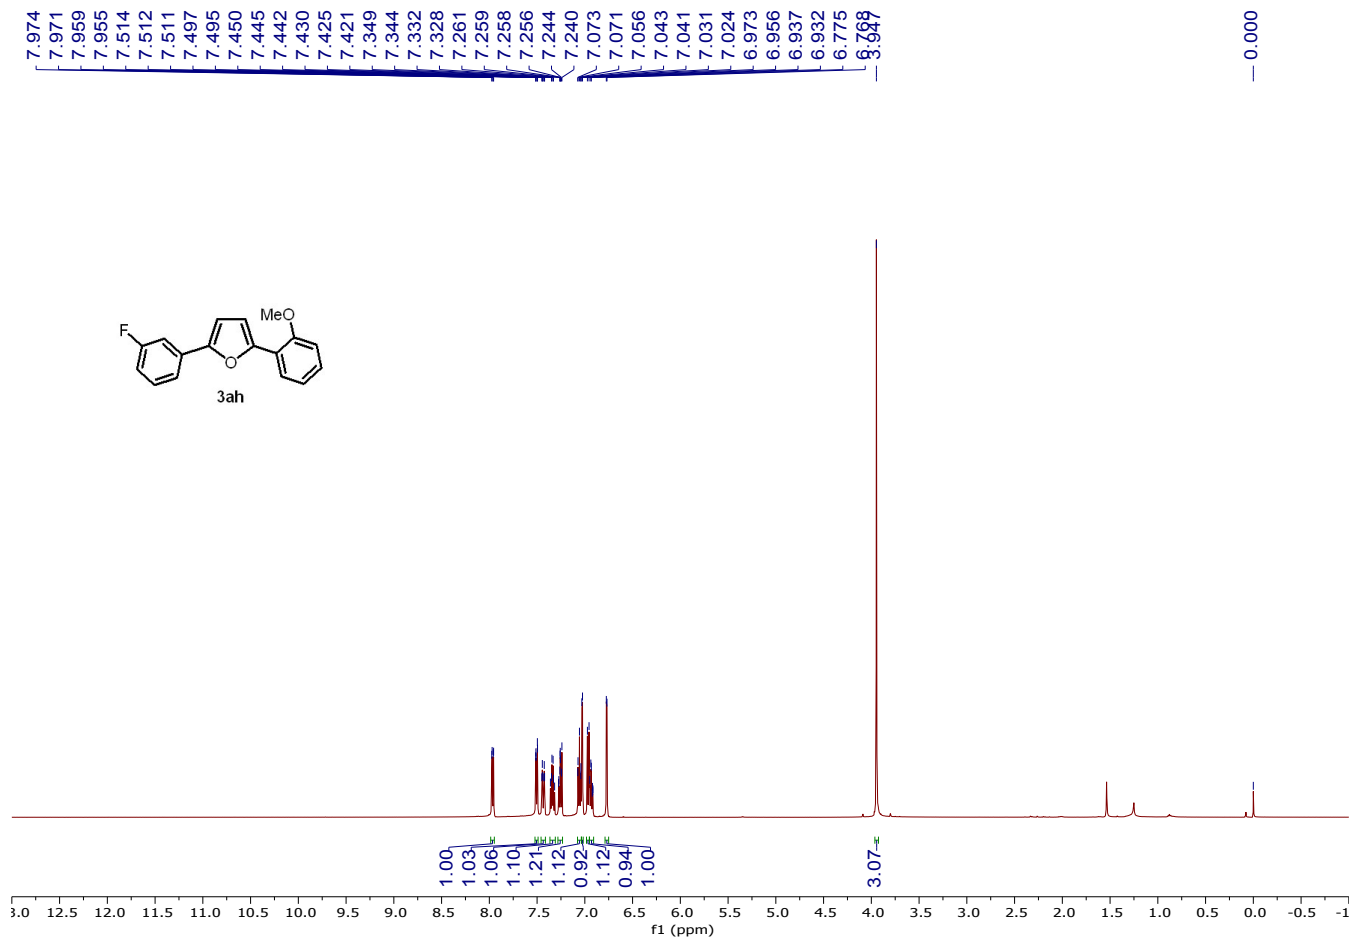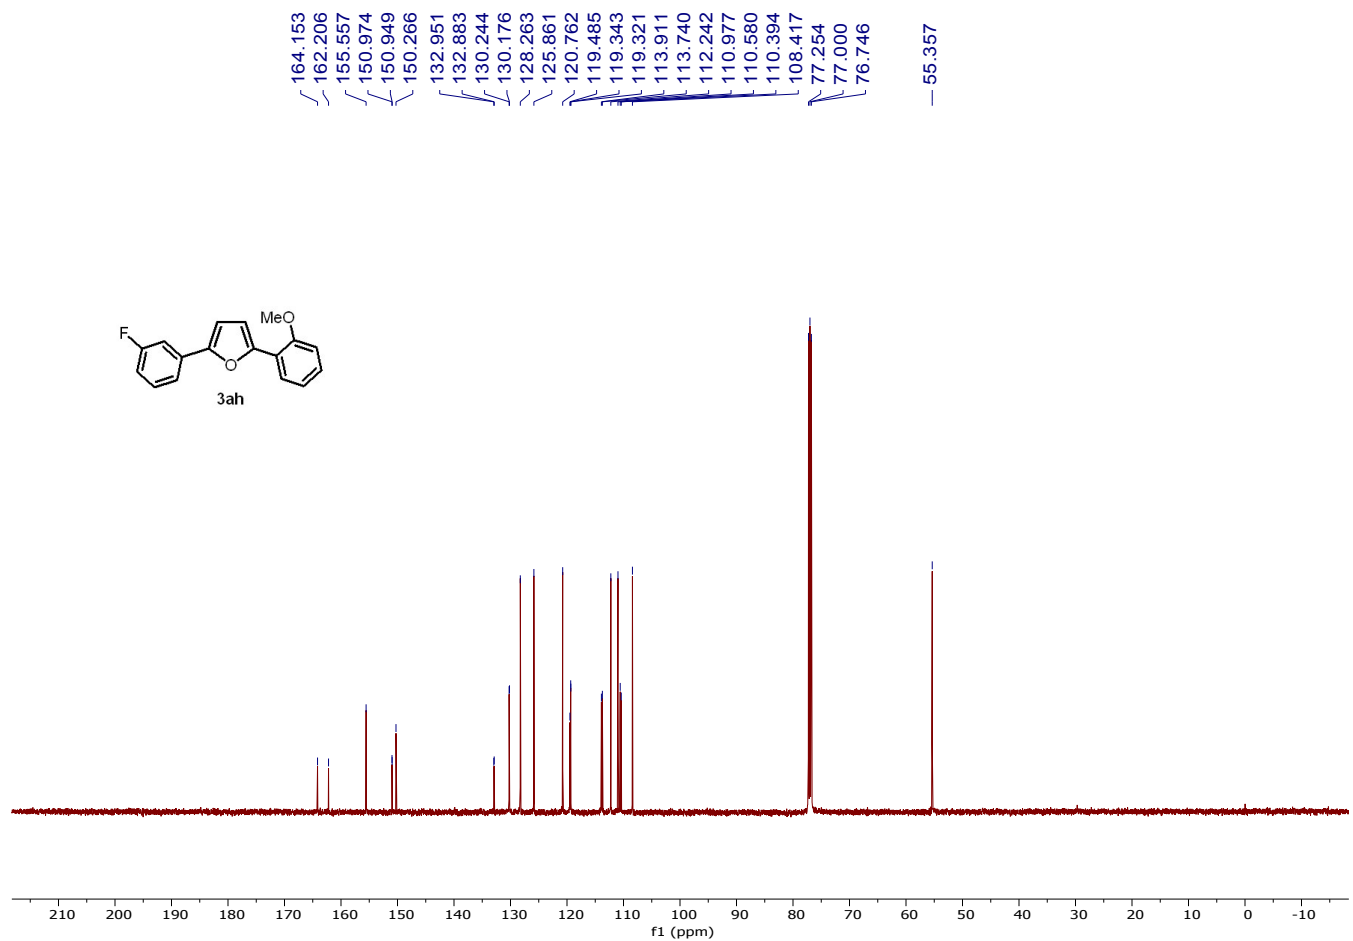

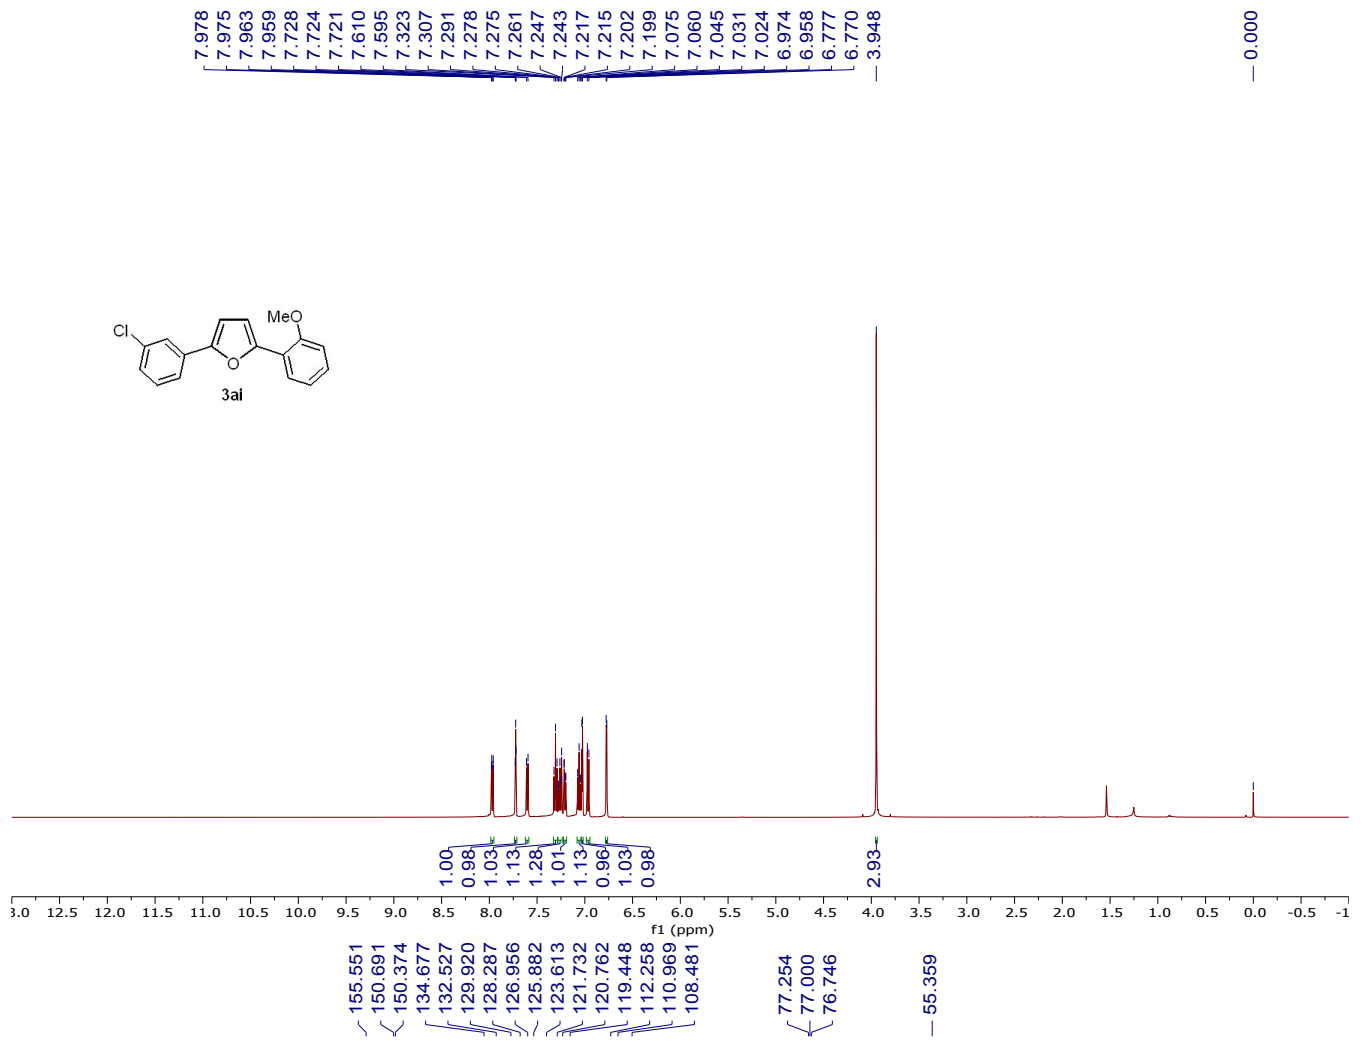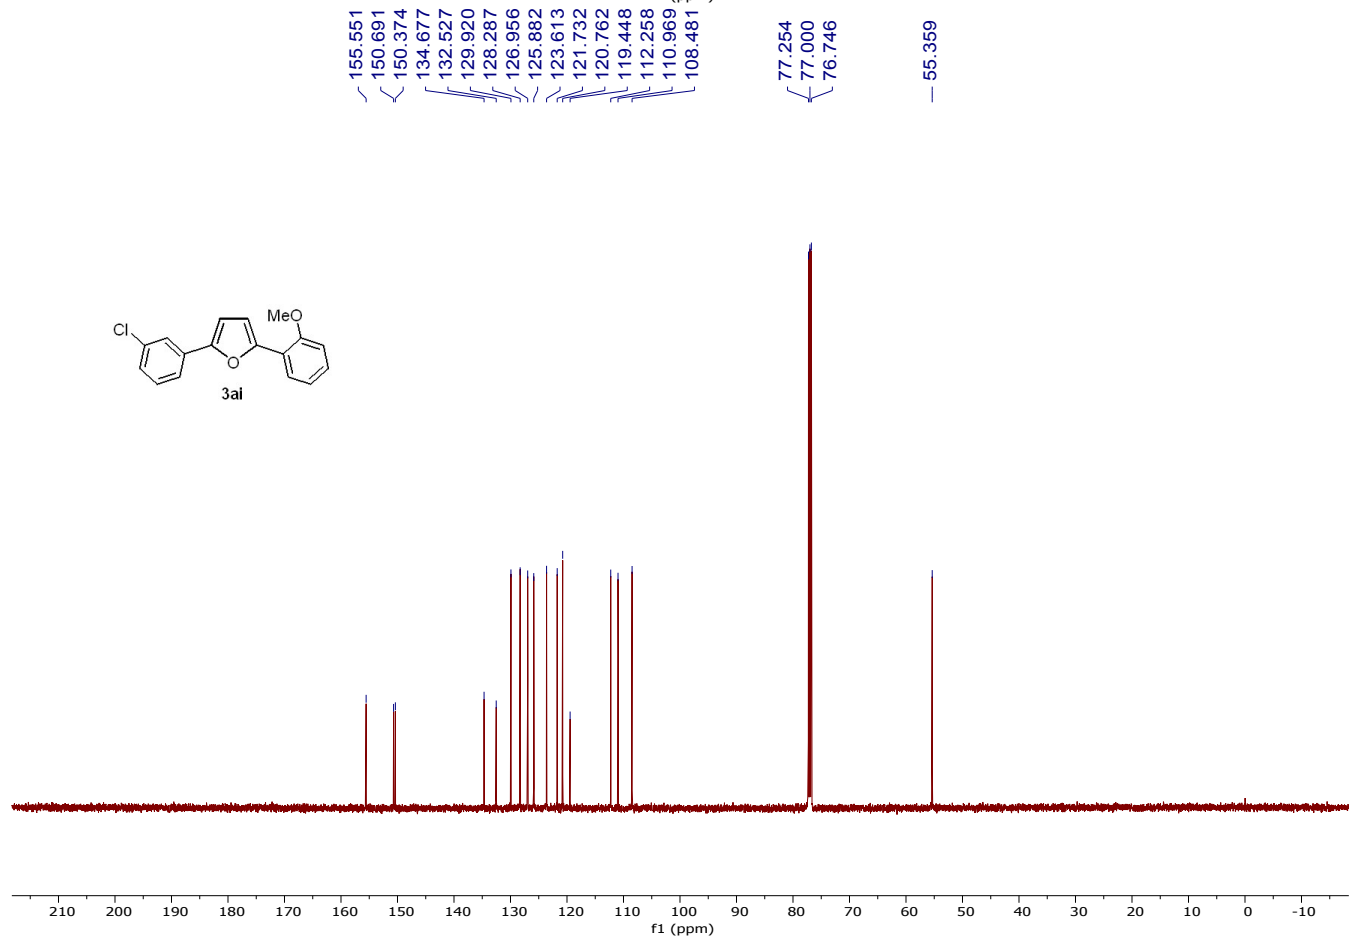

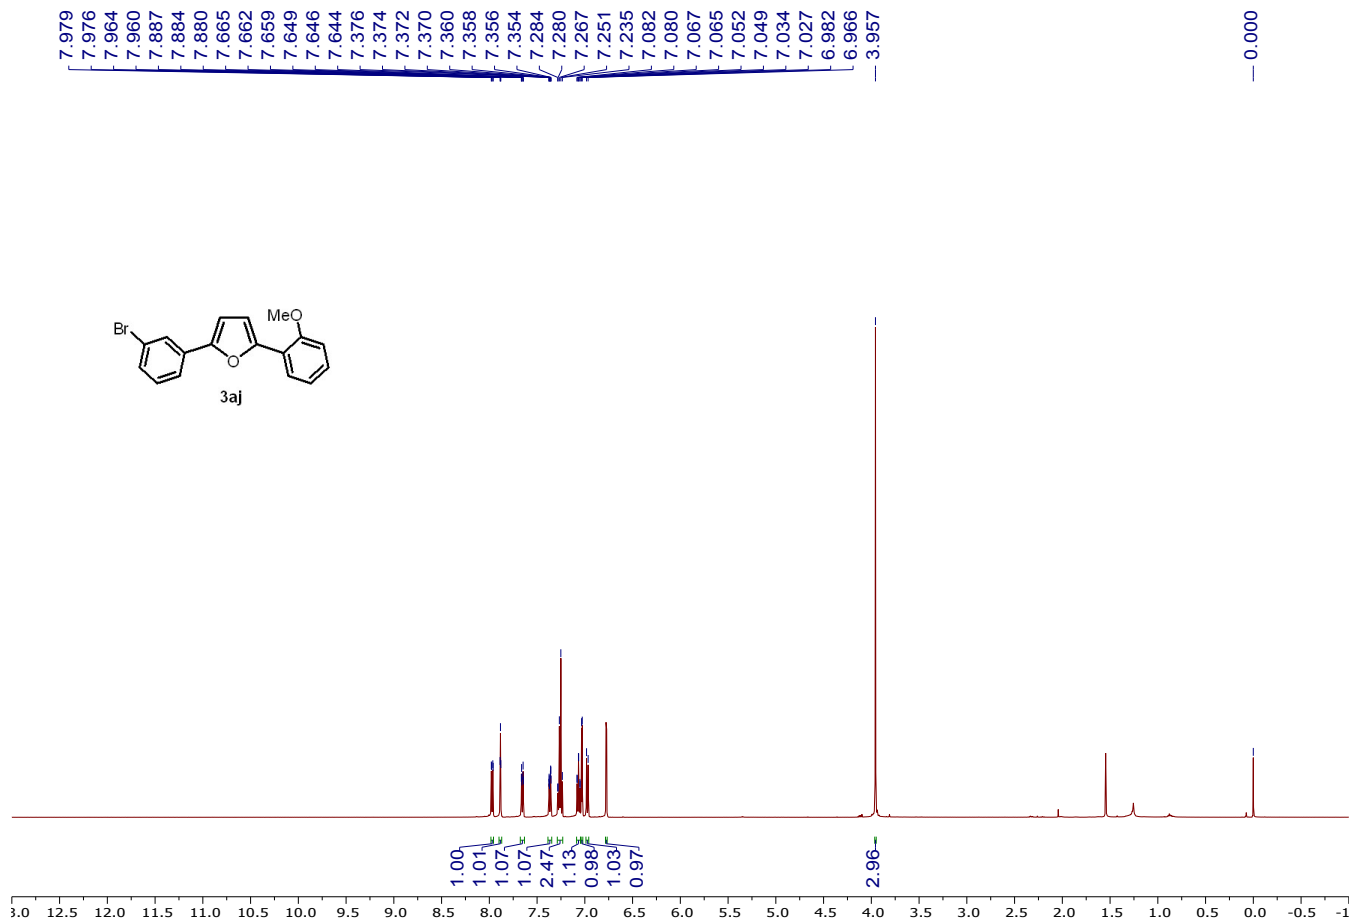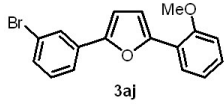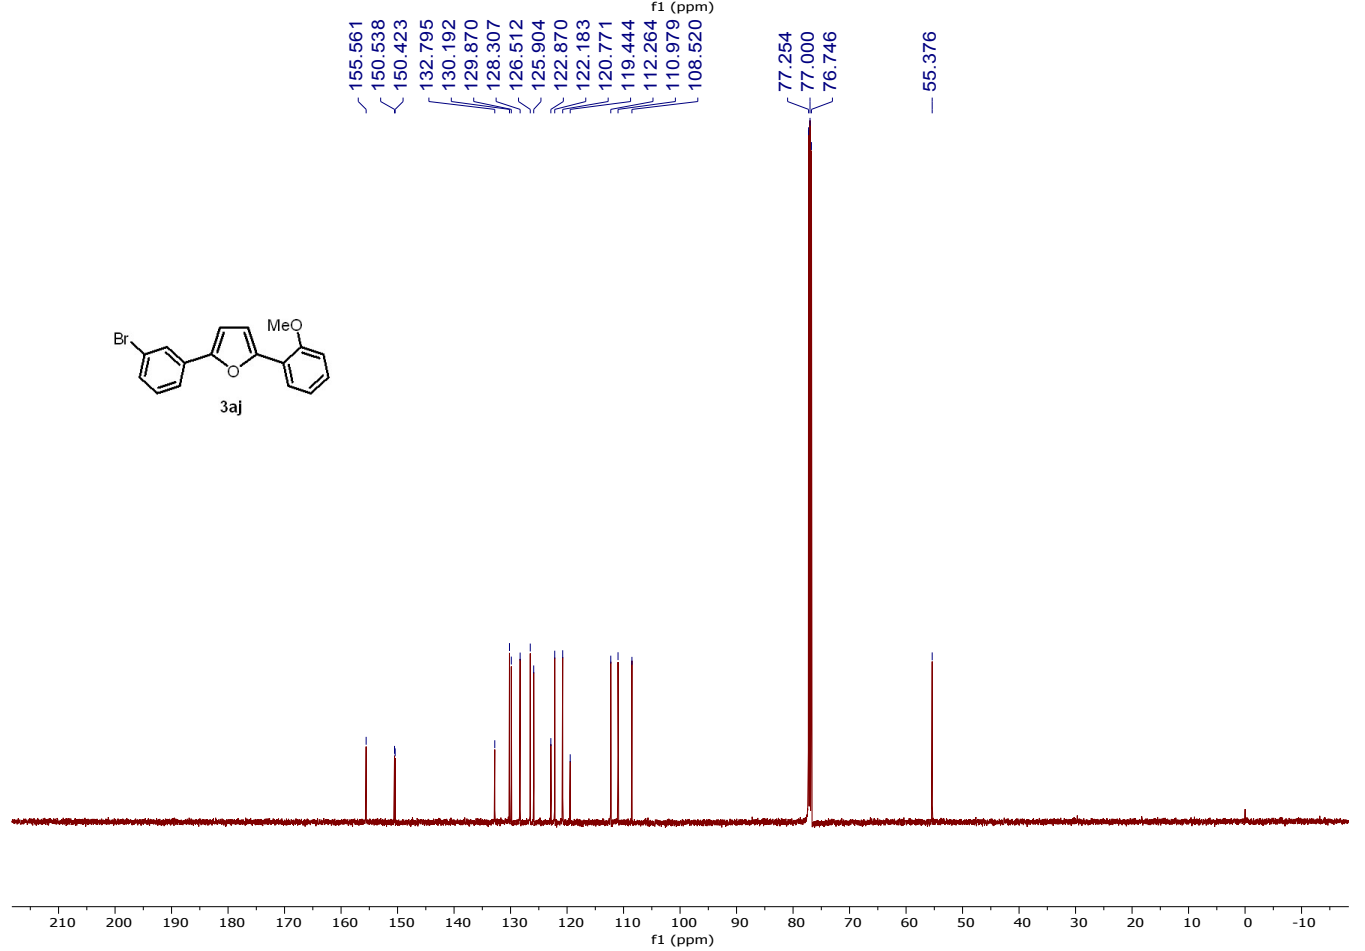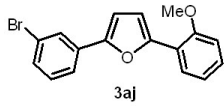

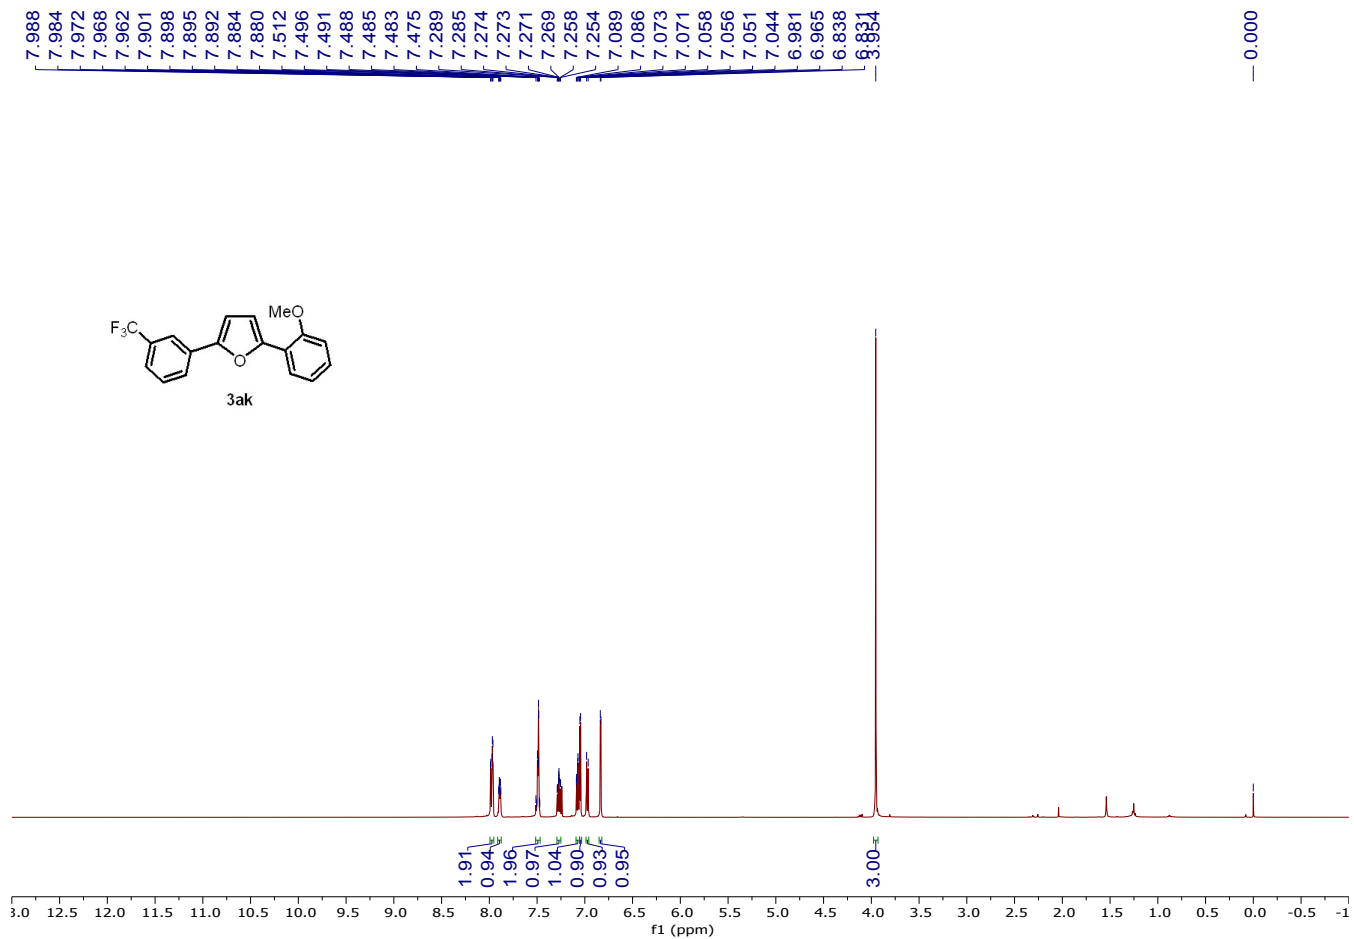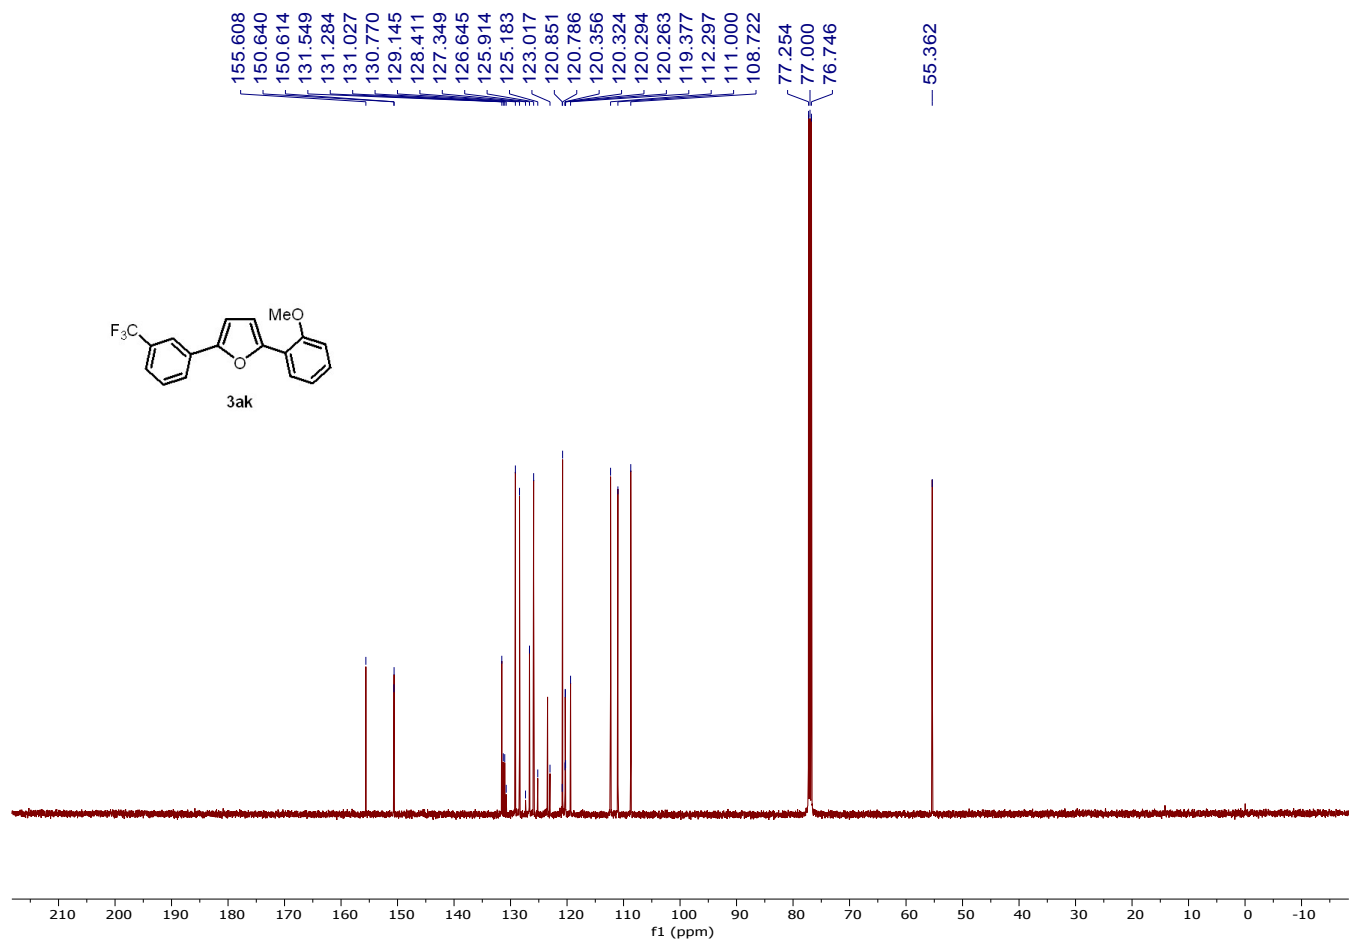

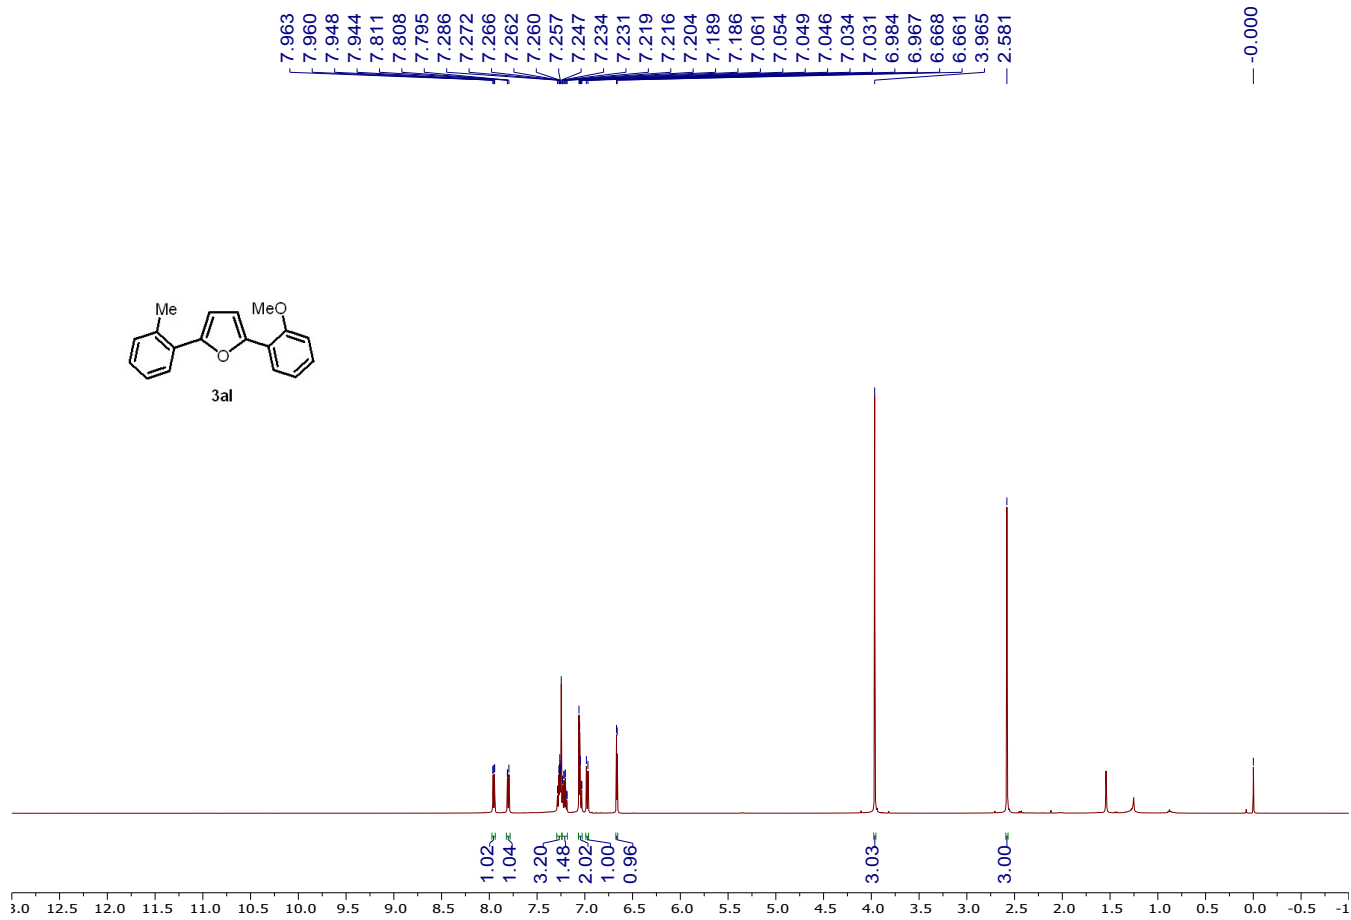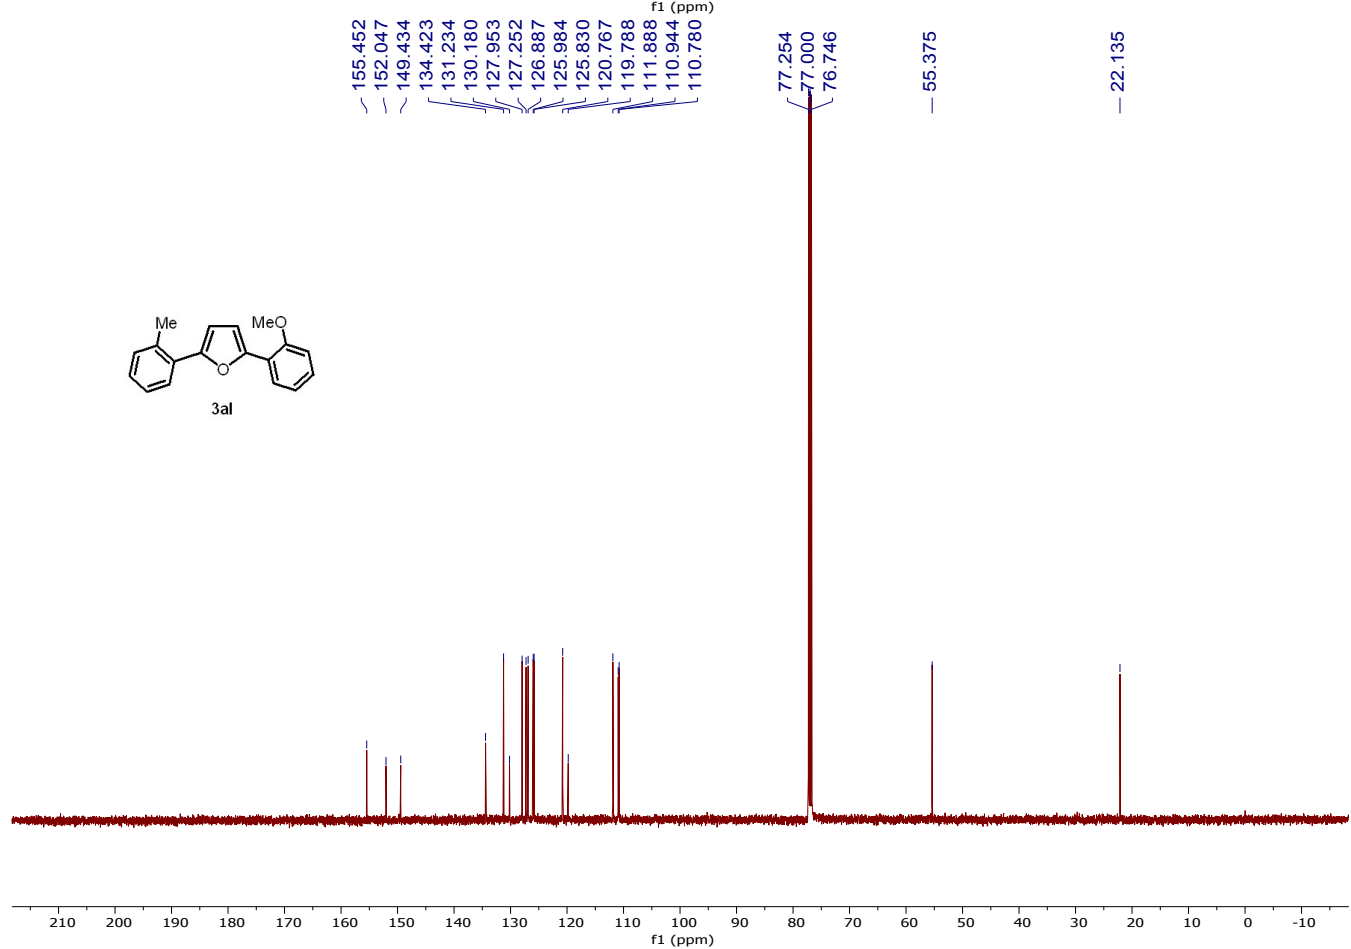



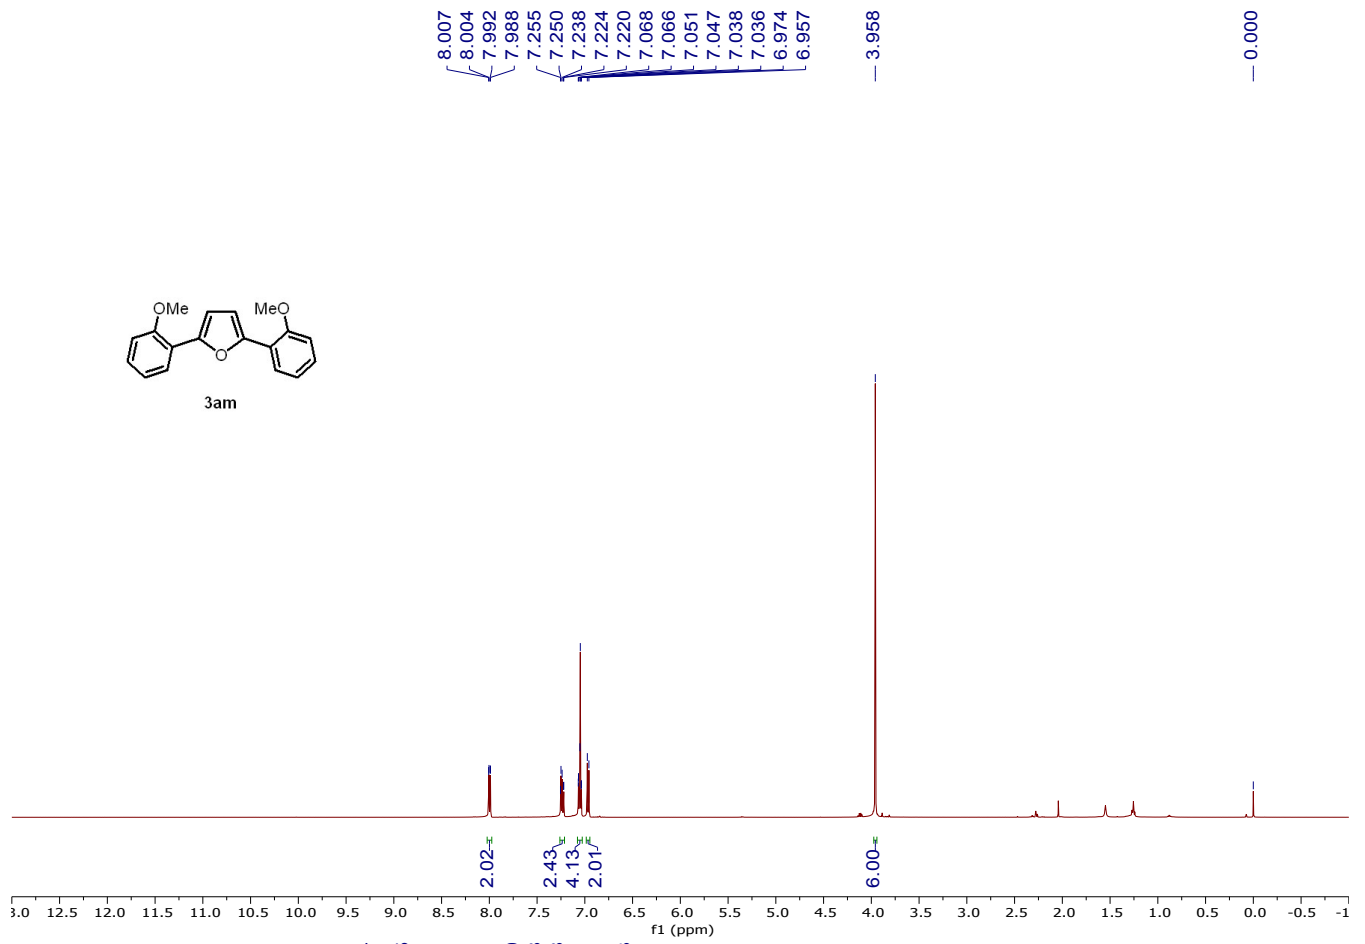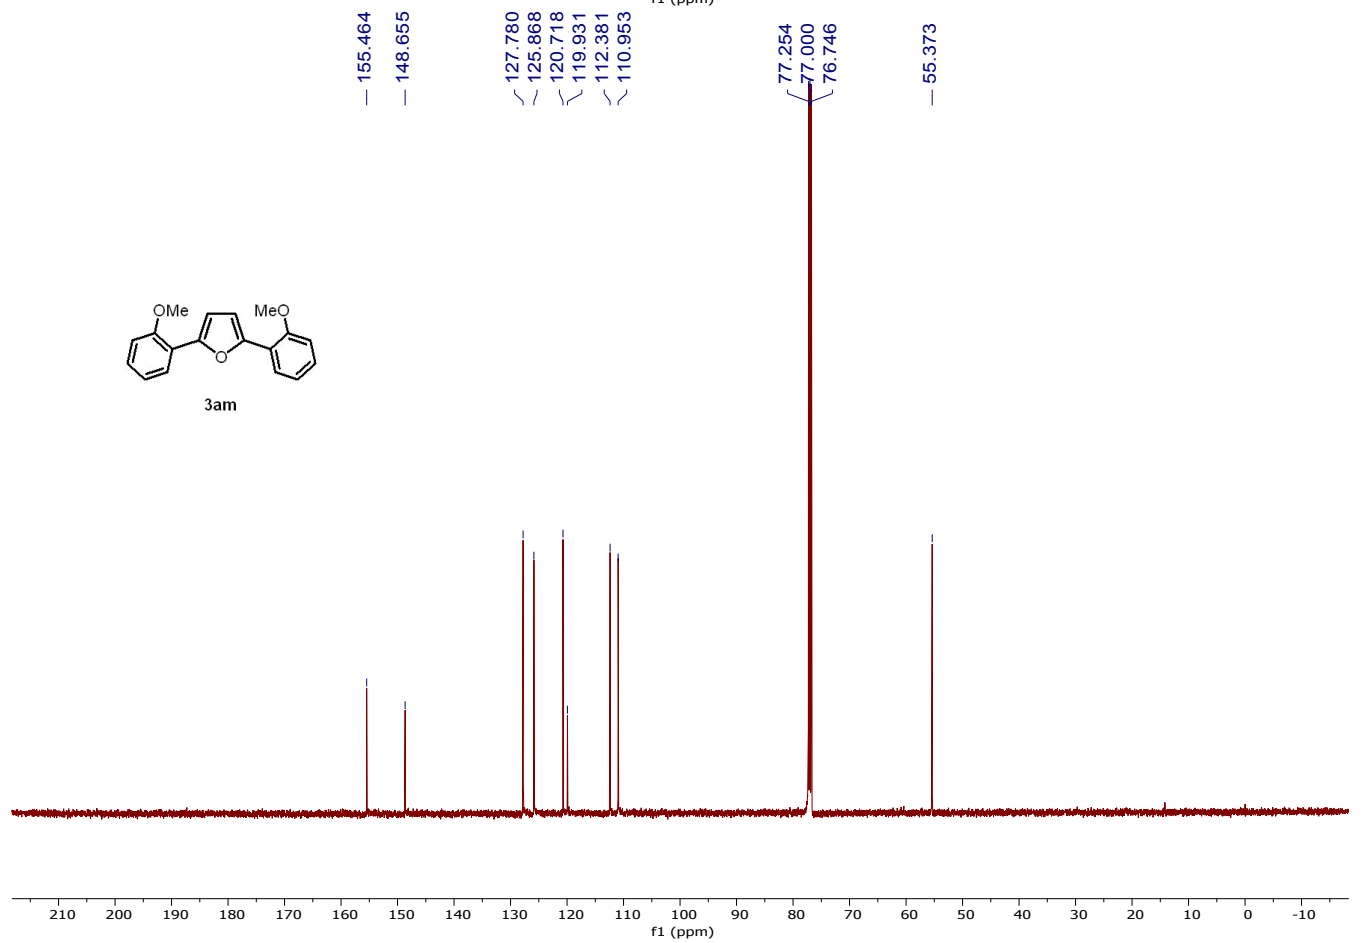

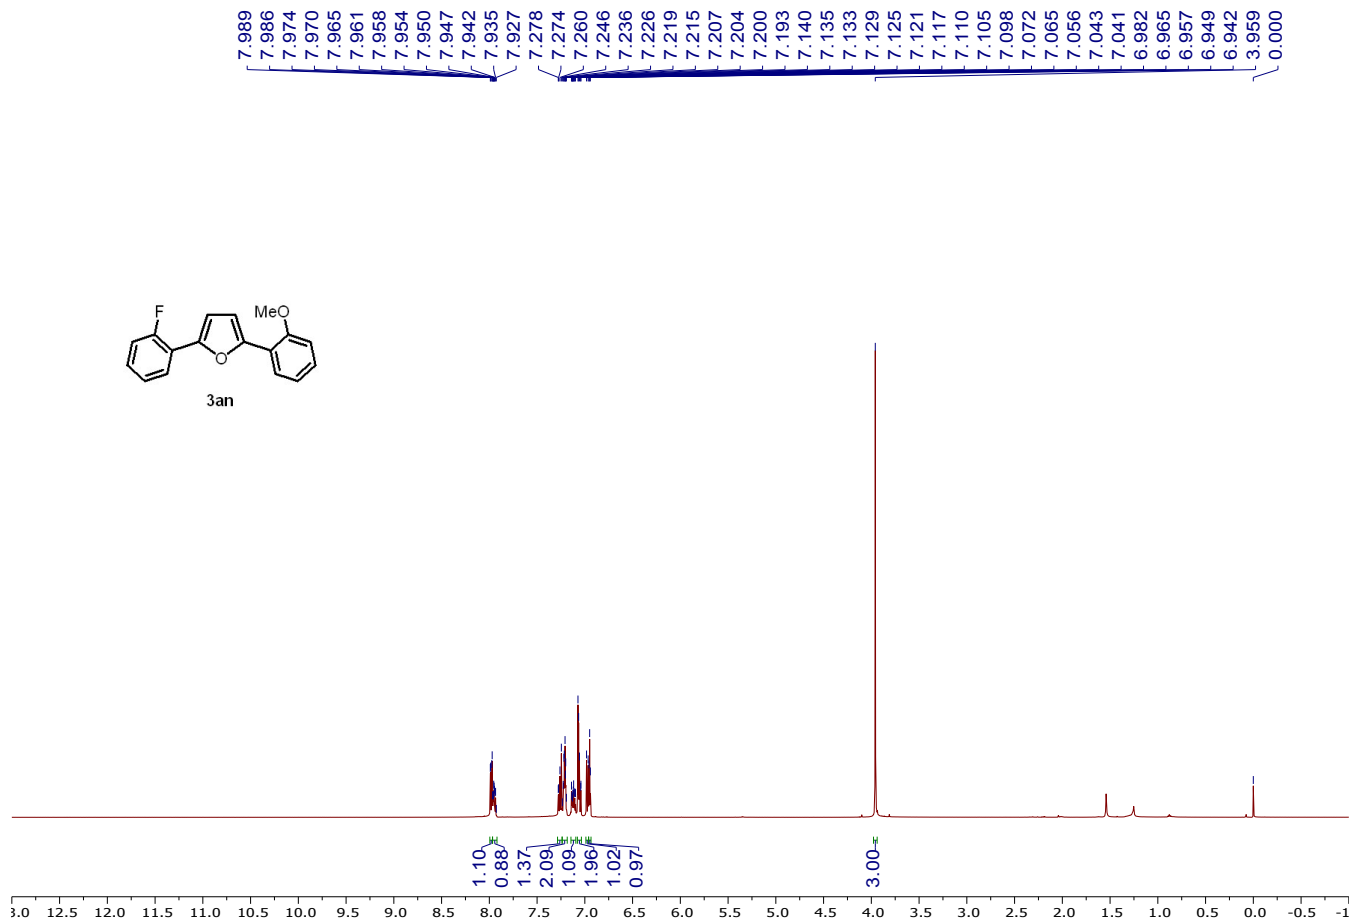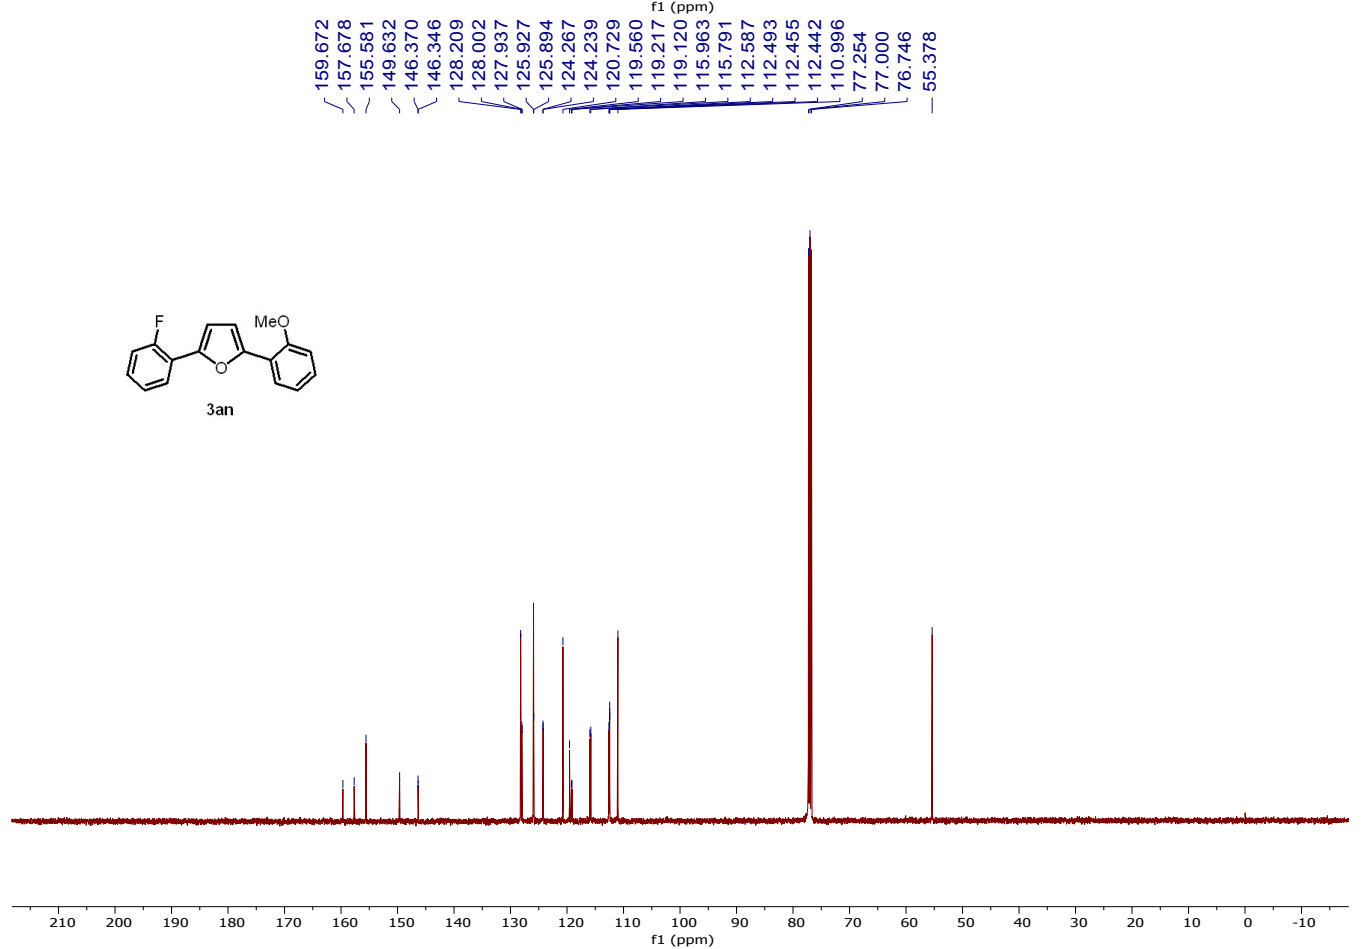

7.997  
7.993  
7.981  
7.978  
7.966  
7.963  
7.453  
7.451  
7.437  
7.435  
7.358  
7.356  
7.353  
7.341  
7.327  
7.325  
7.323  
7.288  
7.286  
7.283  
7.274  
7.272  
7.270  
7.268  
7.266  
7.254  
7.252  
7.247  
7.240  
7.207  
7.205  
7.202  
7.190  
7.189  
7.187  
7.185  
7.176  
7.174  
7.171  
7.079  
7.077  
7.072  
7.070  
7.057  
7.044  
7.042  
7.040  
6.992  
6.976  
3.969  
0.000

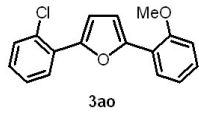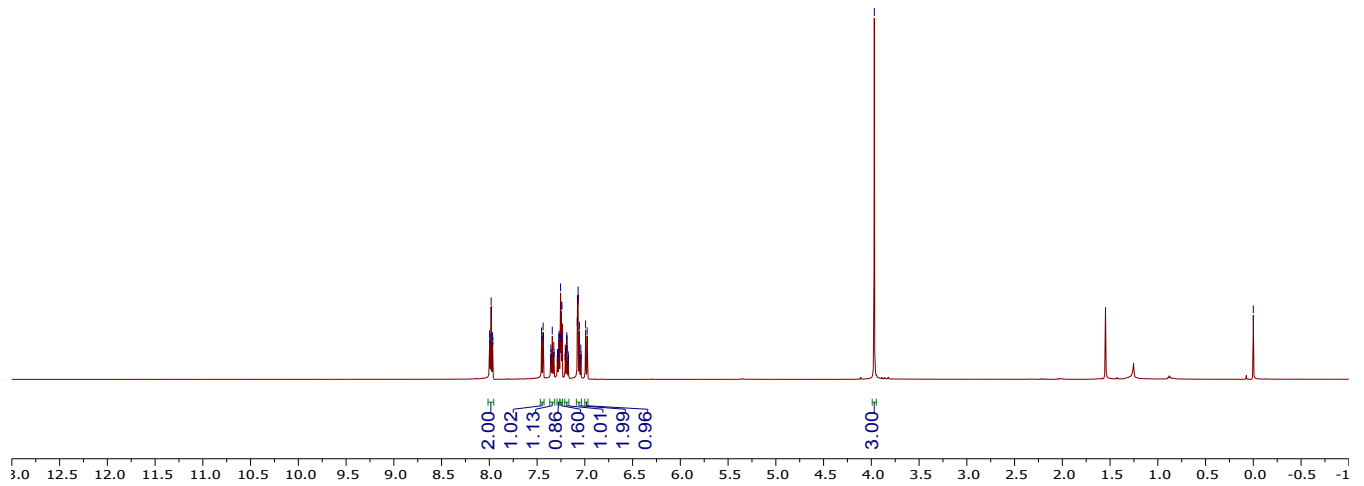

155.657  
149.804  
148.498  
130.759  
129.968  
129.237  
128.306  
127.760  
127.710  
126.836  
126.041  
120.749  
119.510  
113.308  
112.165  
111.016

77.254  
77.000  
76.746

55.406

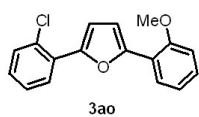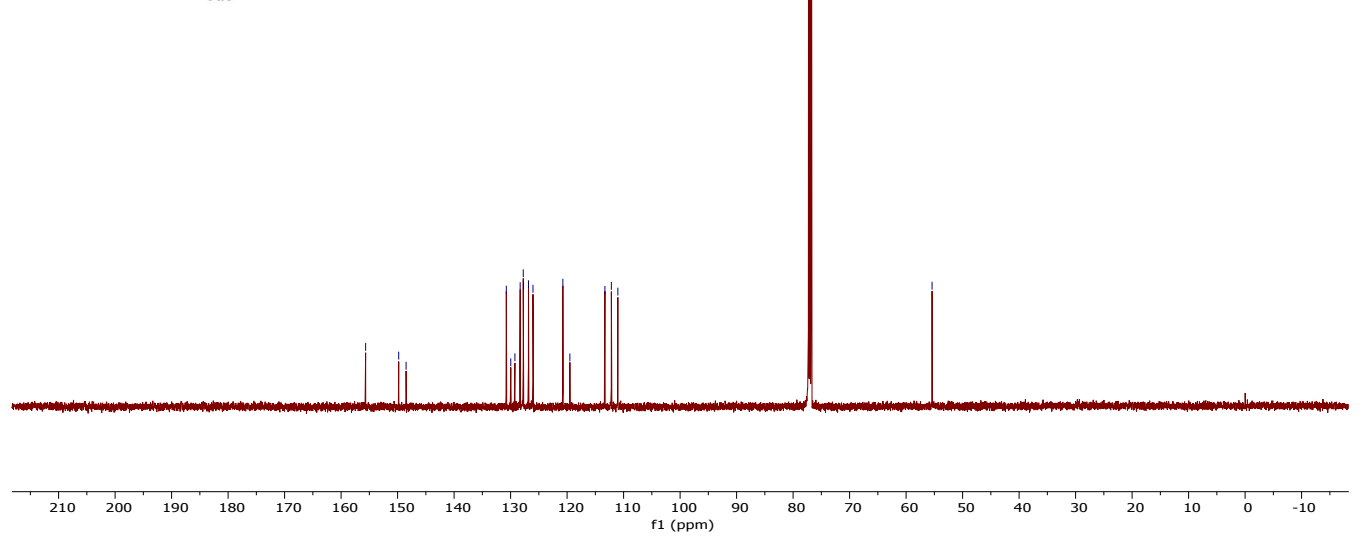

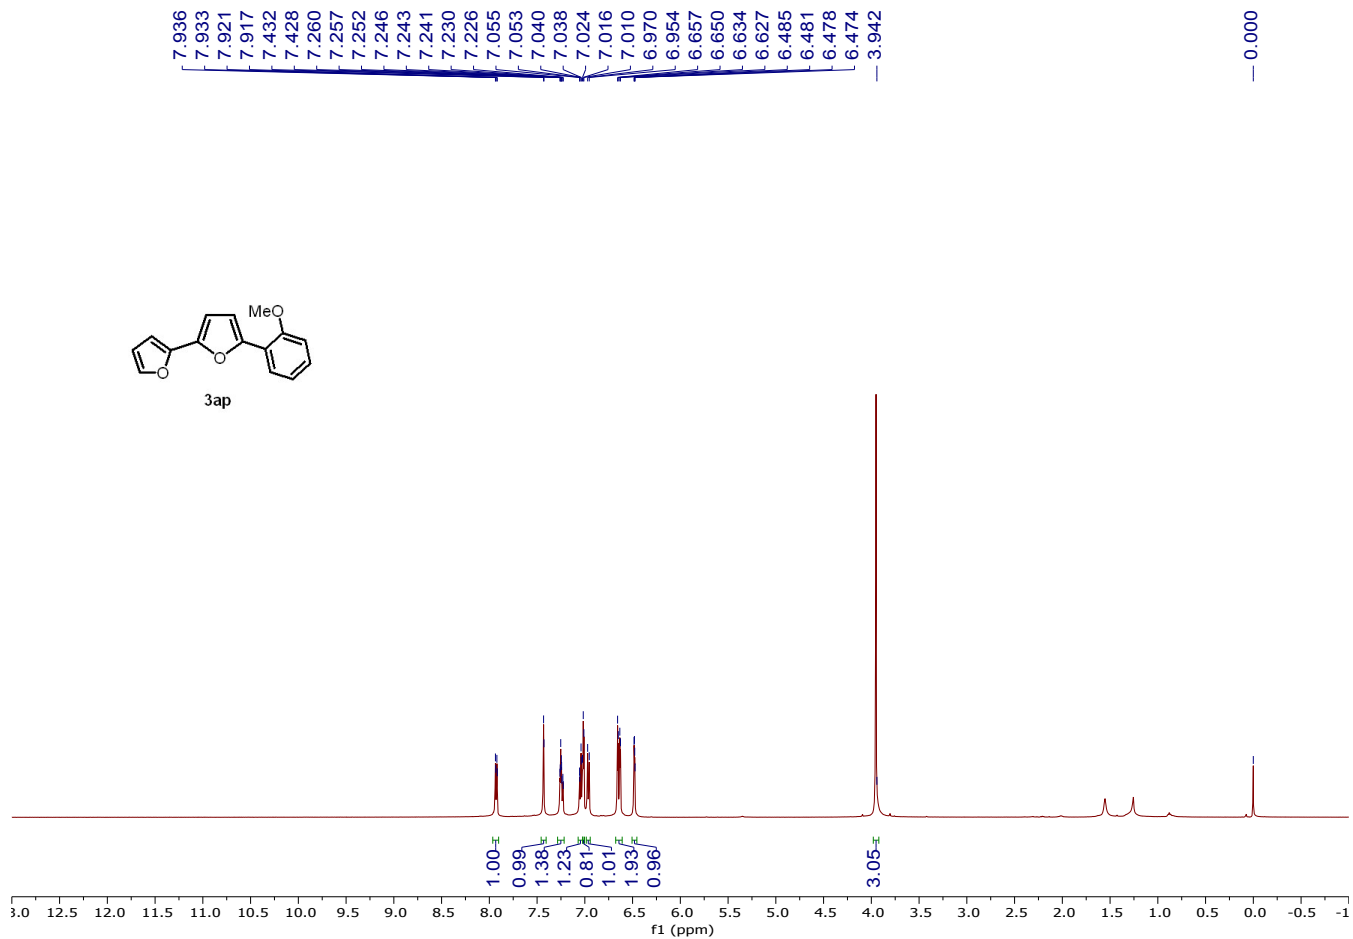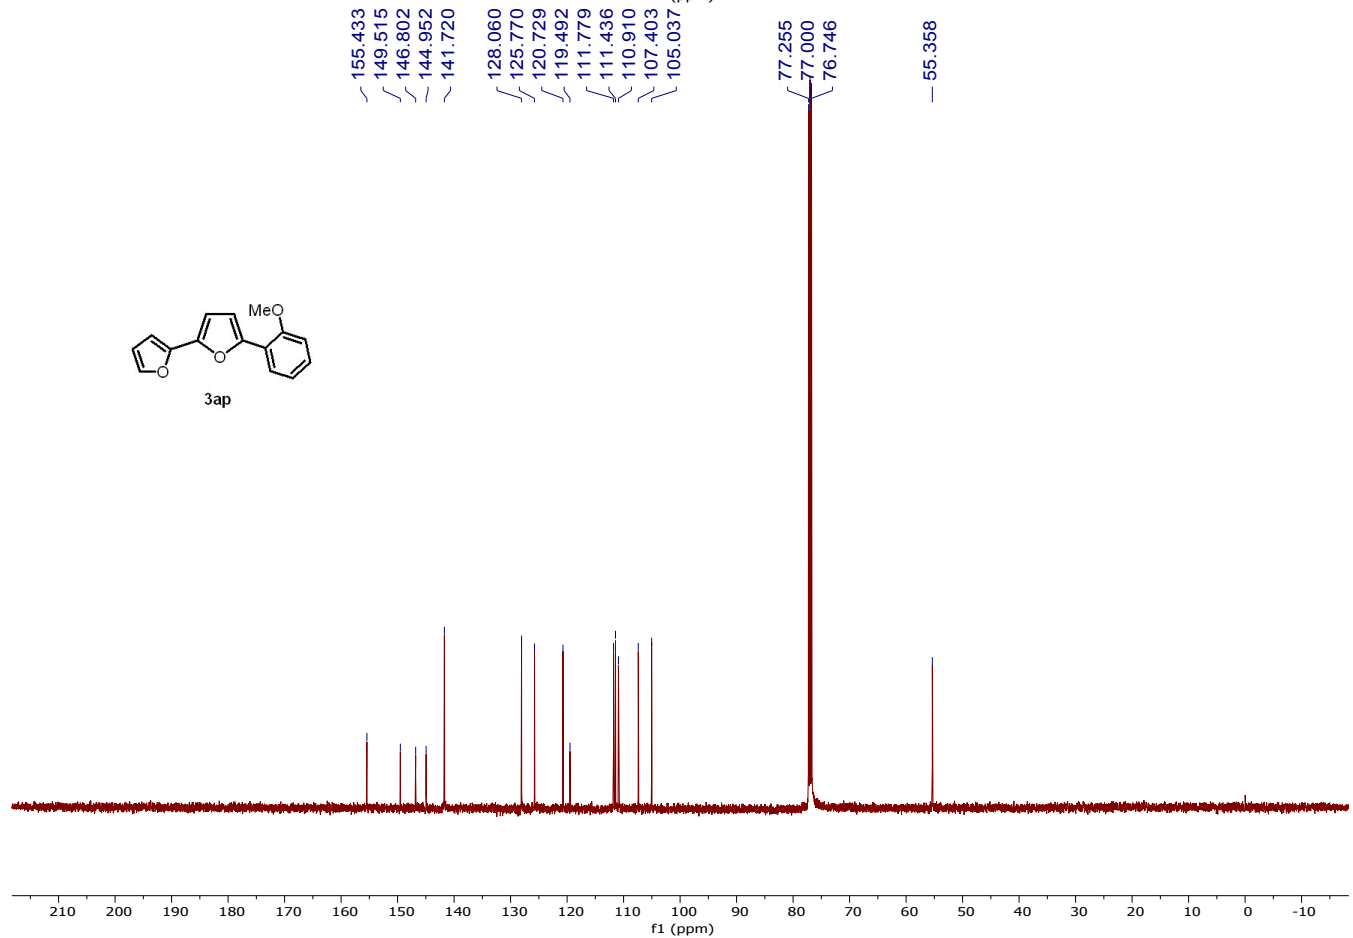

7.944  
7.941  
7.929  
7.925  
7.322  
7.320  
7.315  
7.313  
7.258  
7.255  
7.246  
7.243  
7.242  
7.240  
7.238  
7.229  
7.227  
7.223  
7.219  
7.217  
7.061  
7.058  
7.051  
7.048  
7.046  
7.044  
7.041  
7.031  
7.029  
6.999  
6.992  
6.965  
6.949  
6.605  
6.598  
3.947

-0.000

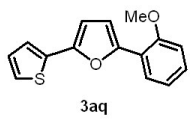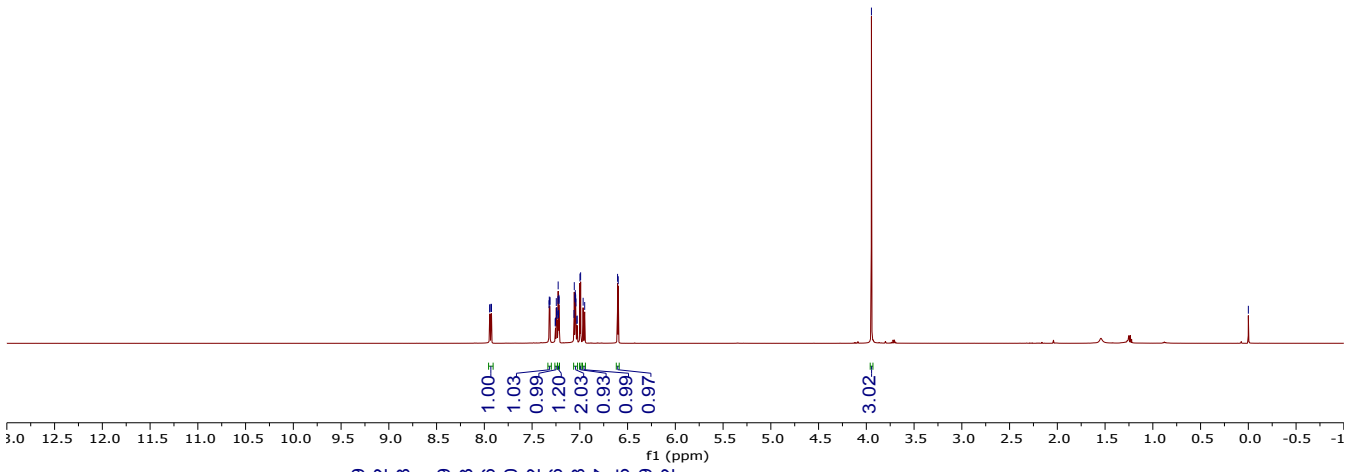

155.419  
149.332  
147.898  
133.979  
128.003  
127.646  
125.750  
123.942  
122.356  
120.748  
119.497  
112.105  
110.909  
107.342  
77.254  
77.000  
76.746  
55.352

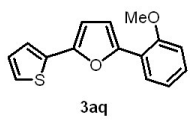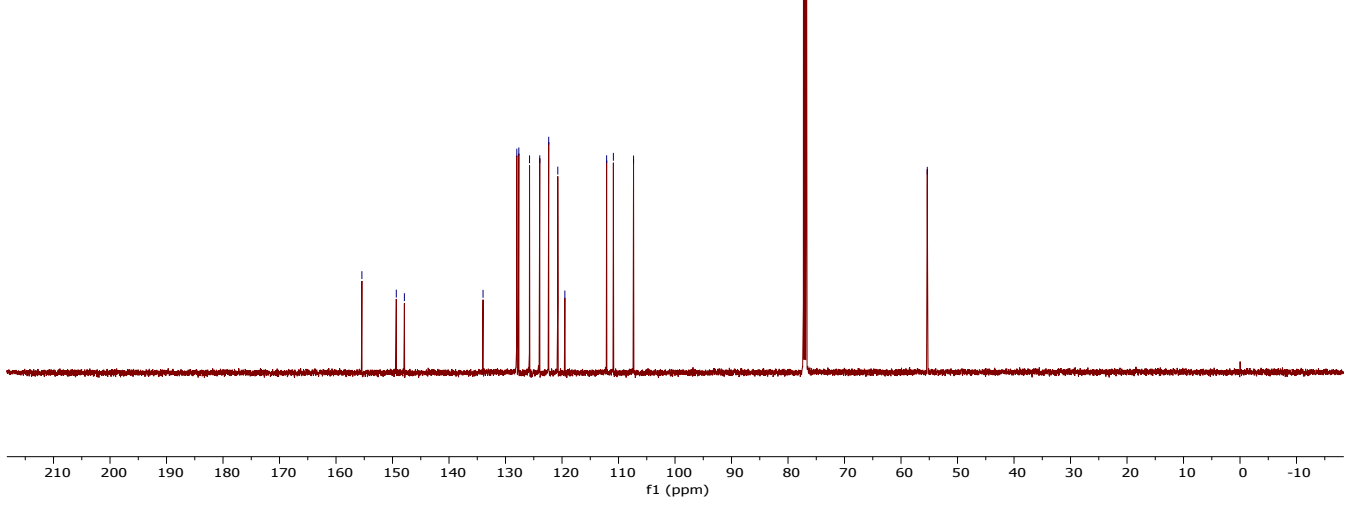

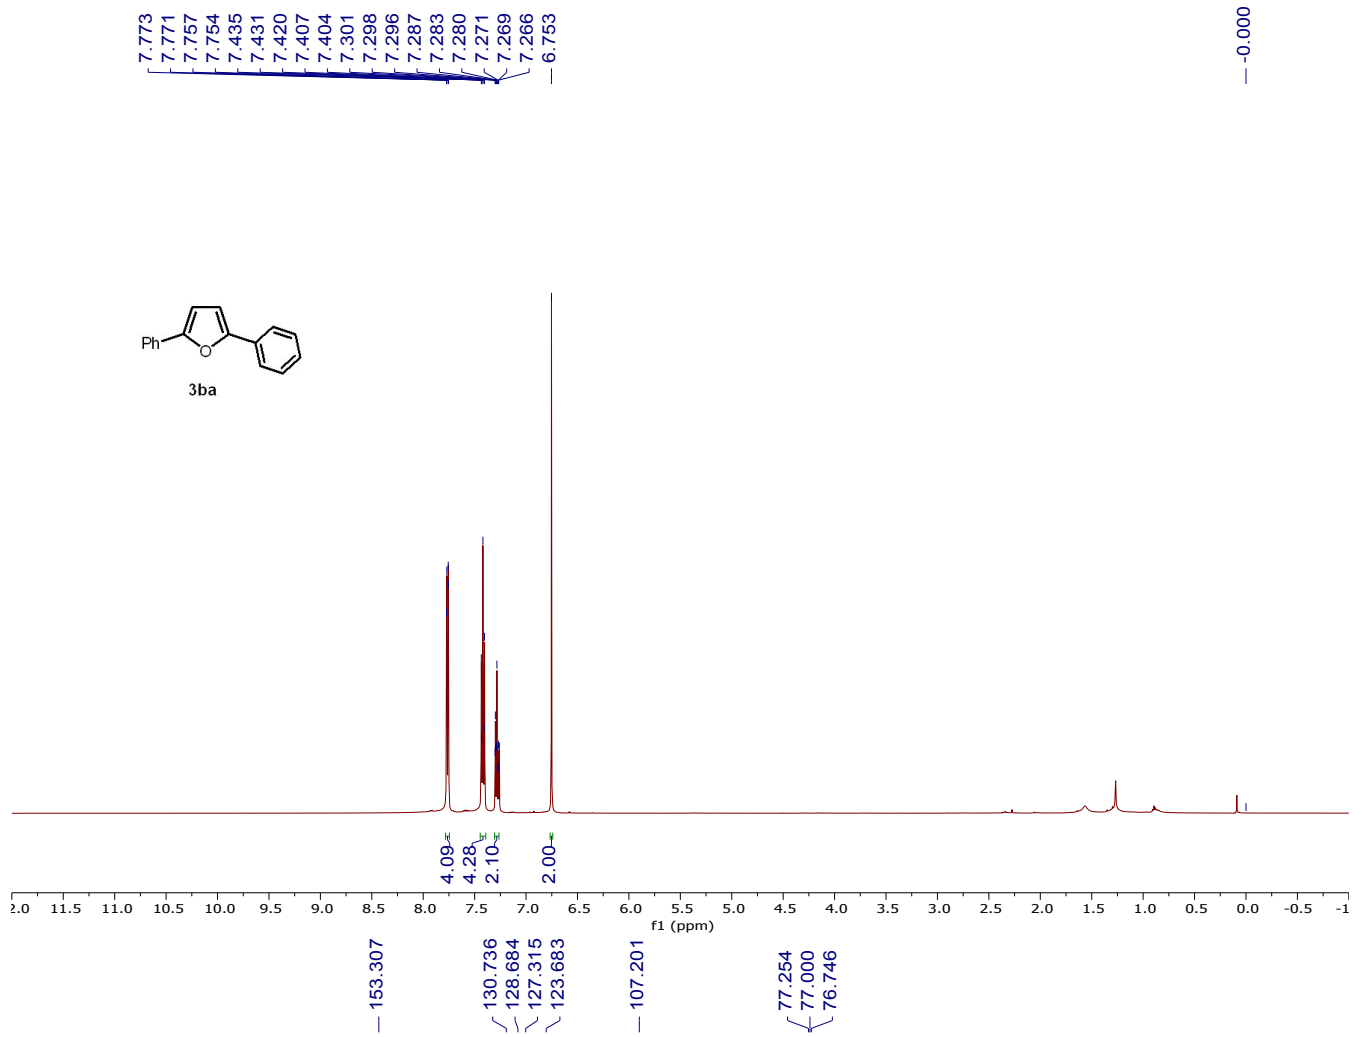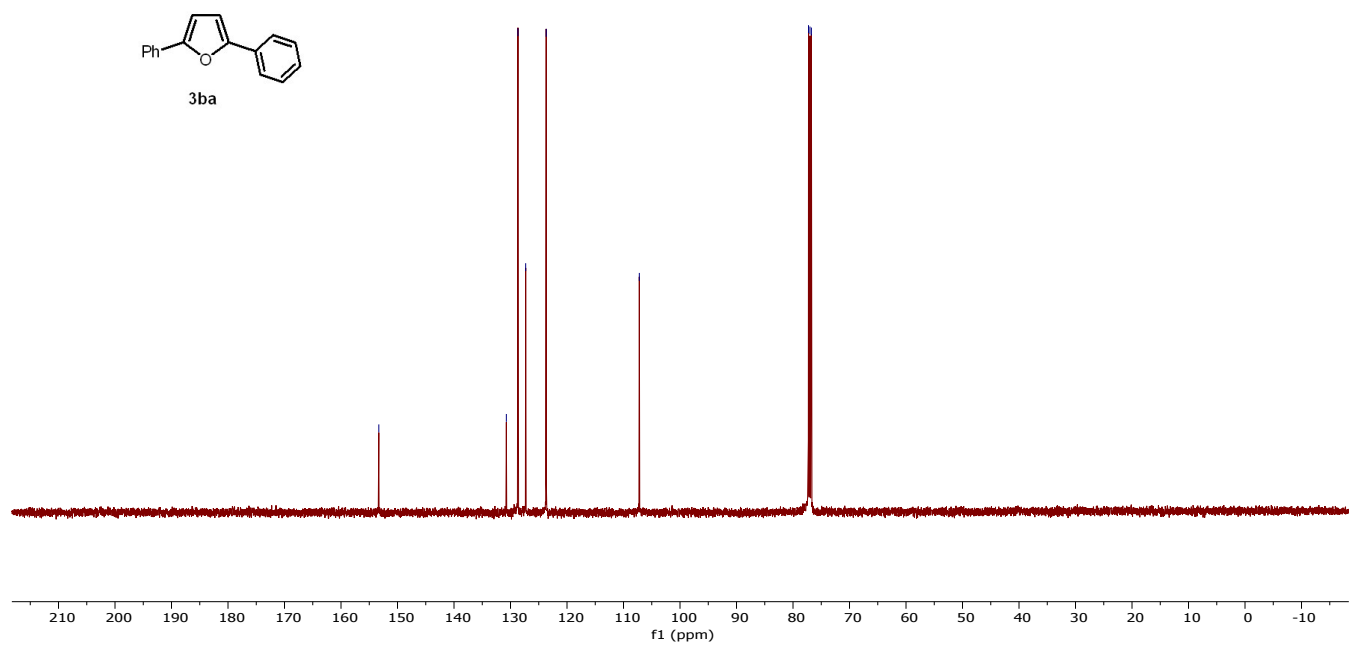

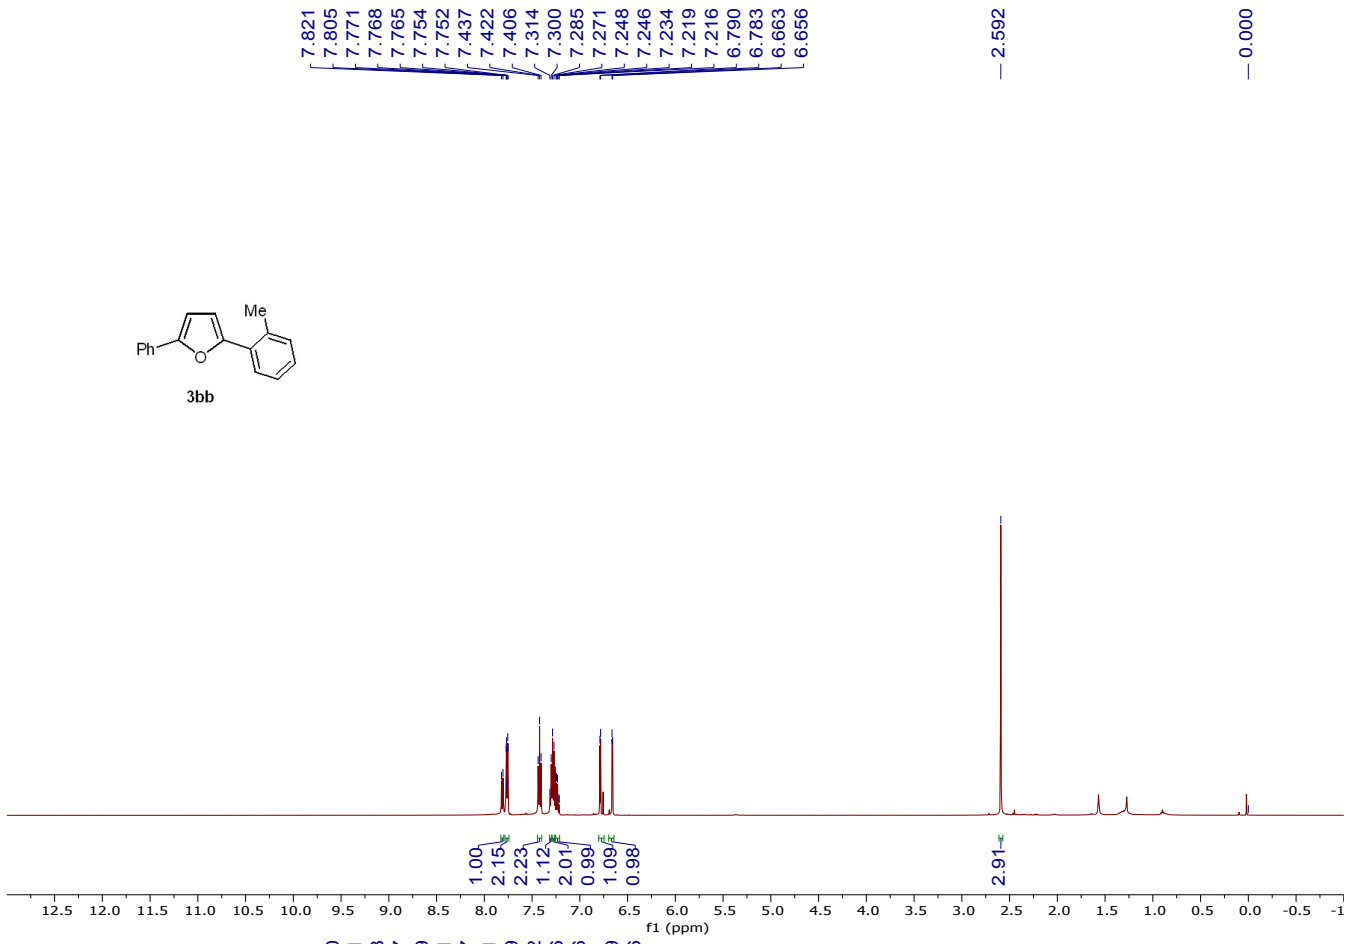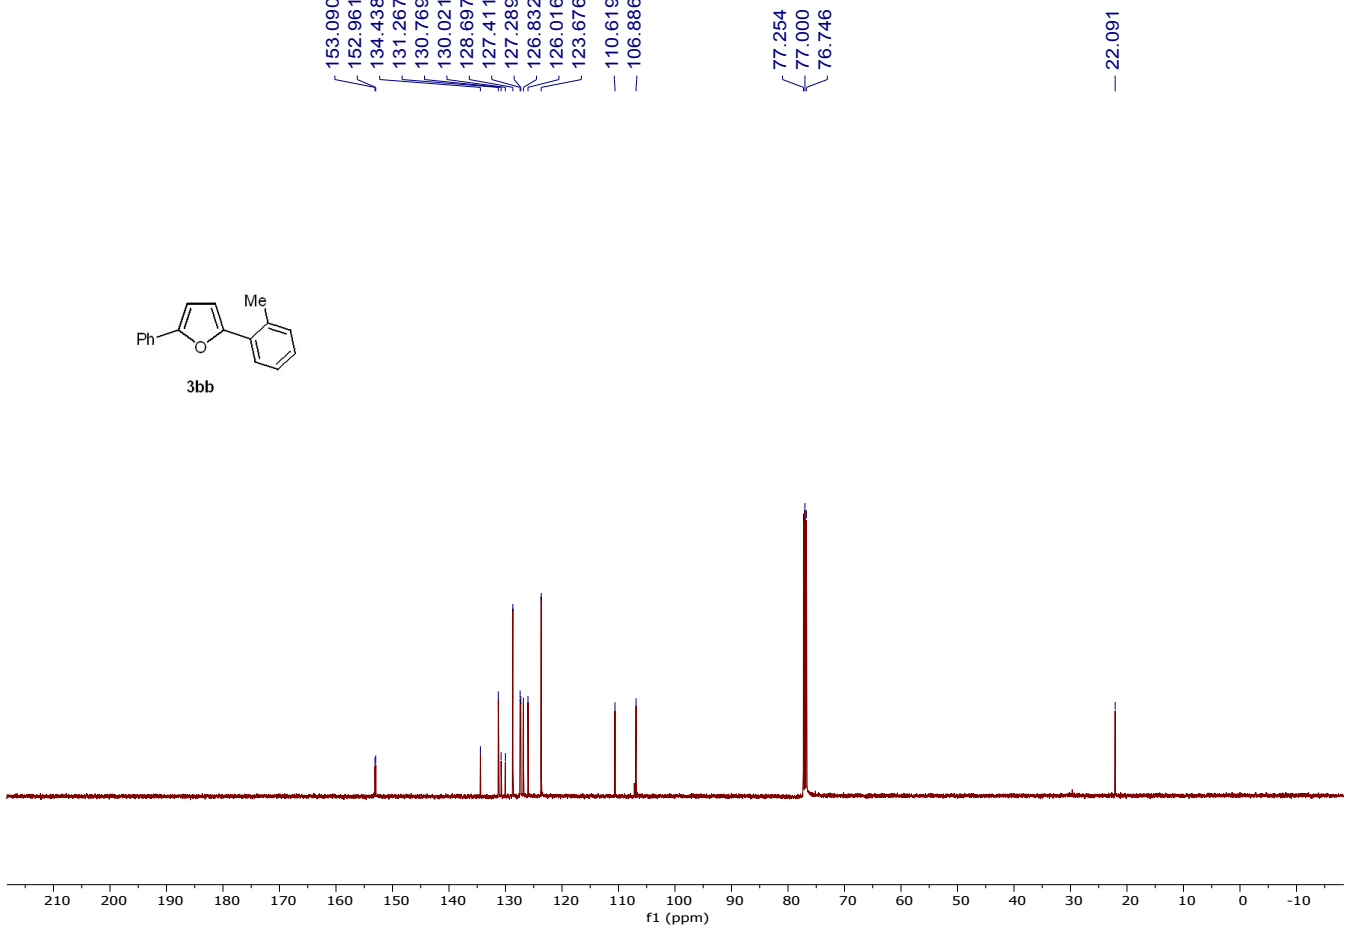

8.115  
8.109  
8.103  
8.100  
8.096  
8.082  
7.779  
7.765  
7.763  
7.450  
7.435  
7.419  
7.400  
7.396  
7.386  
7.383  
7.372  
7.368  
7.321  
7.318  
7.316  
7.304  
7.291  
7.287  
7.283  
7.272  
7.268  
7.267  
7.260  
7.254  
7.252  
7.247  
7.163  
7.161  
7.158  
7.148  
7.146  
7.143  
7.133  
7.131  
7.129  
7.086  
7.083  
7.068  
7.066  
7.022  
7.015  
7.006  
7.003  
7.000  
6.992  
6.988  
6.750  
6.743  
0.000

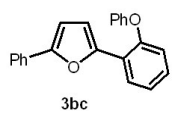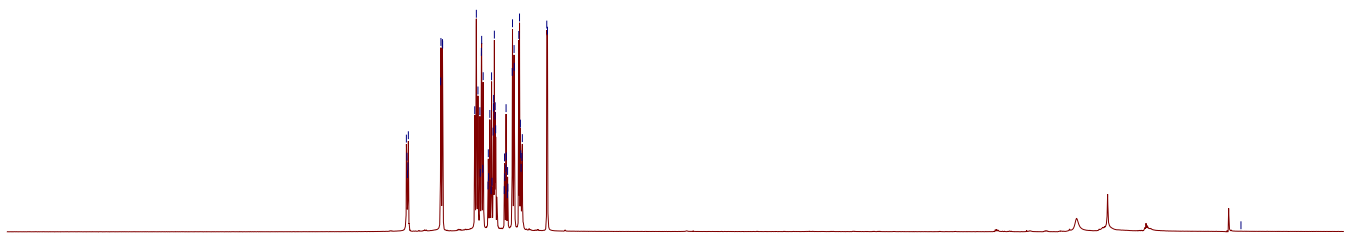

1.03  
2.16  
2.26  
2.20  
1.57  
2.00  
1.17  
2.16  
1.04  
1.08  
1.03

156.914  
152.719  
152.426  
148.993  
130.690  
129.820  
128.663  
128.019  
127.327  
126.237  
123.910  
123.788  
123.151  
122.824  
119.782  
118.265  
112.550  
107.533

77.254  
77.000  
76.746

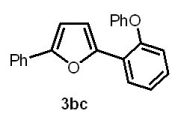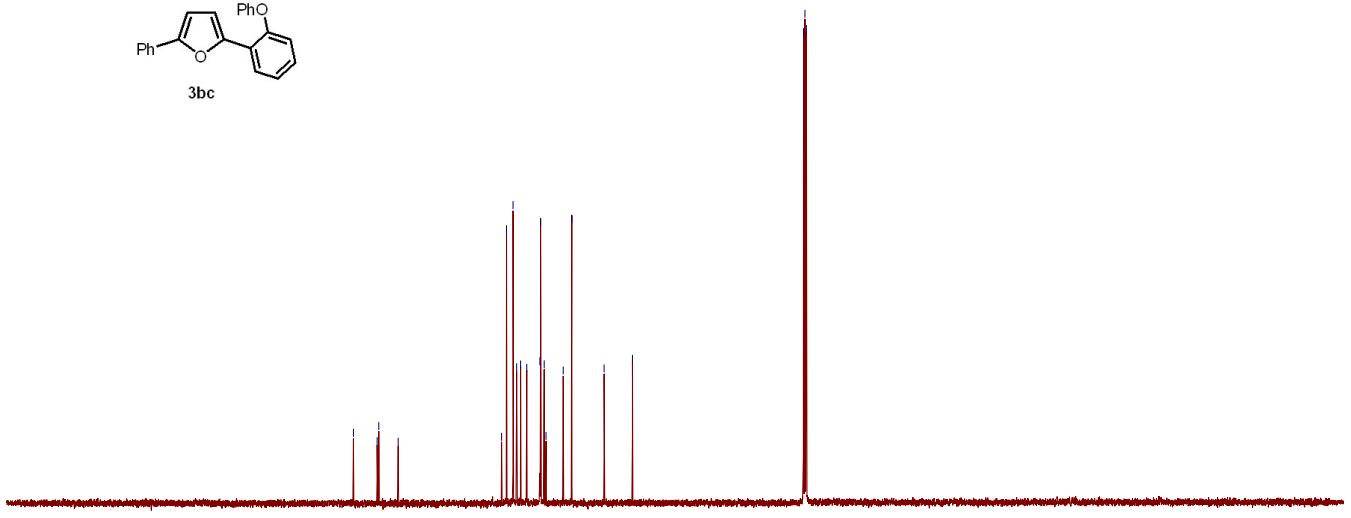

210  
200  
190  
180  
170  
160  
150  
140  
130  
120  
110  
100  
90  
80  
70  
60  
50  
40  
30  
20  
10  
0  
-10



7.975  
7.971  
7.969  
7.961  
7.956  
7.950  
7.947  
7.941  
7.781  
7.778  
7.764  
7.441  
7.426  
7.410  
7.314  
7.312  
7.309  
7.297  
7.284  
7.282  
7.279  
7.254  
7.249  
7.245  
7.240  
7.234  
7.230  
7.226  
7.215  
7.161  
7.156  
7.148  
7.145  
7.142  
7.138  
7.132  
7.129  
7.124  
7.119  
6.953  
6.946  
6.938  
6.796  
6.789

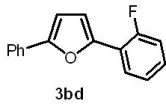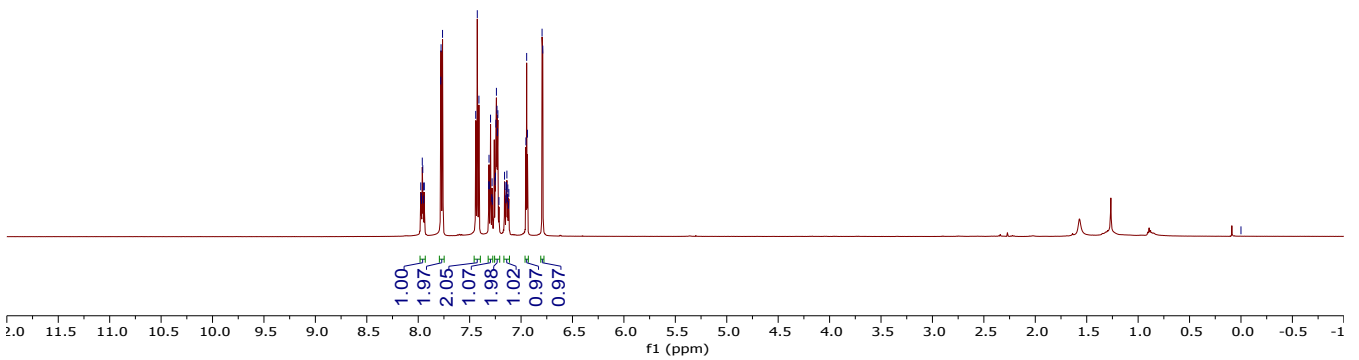

— 0.000

159.660  
157.666  
153.178  
147.438  
147.414  
130.521  
128.716  
128.199  
128.132  
127.536  
125.838  
125.813  
124.304  
124.276  
123.852  
119.068  
118.972  
115.995  
115.825  
112.434  
112.338  
107.490  
107.475  
77.254  
77.000  
76.746

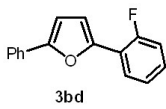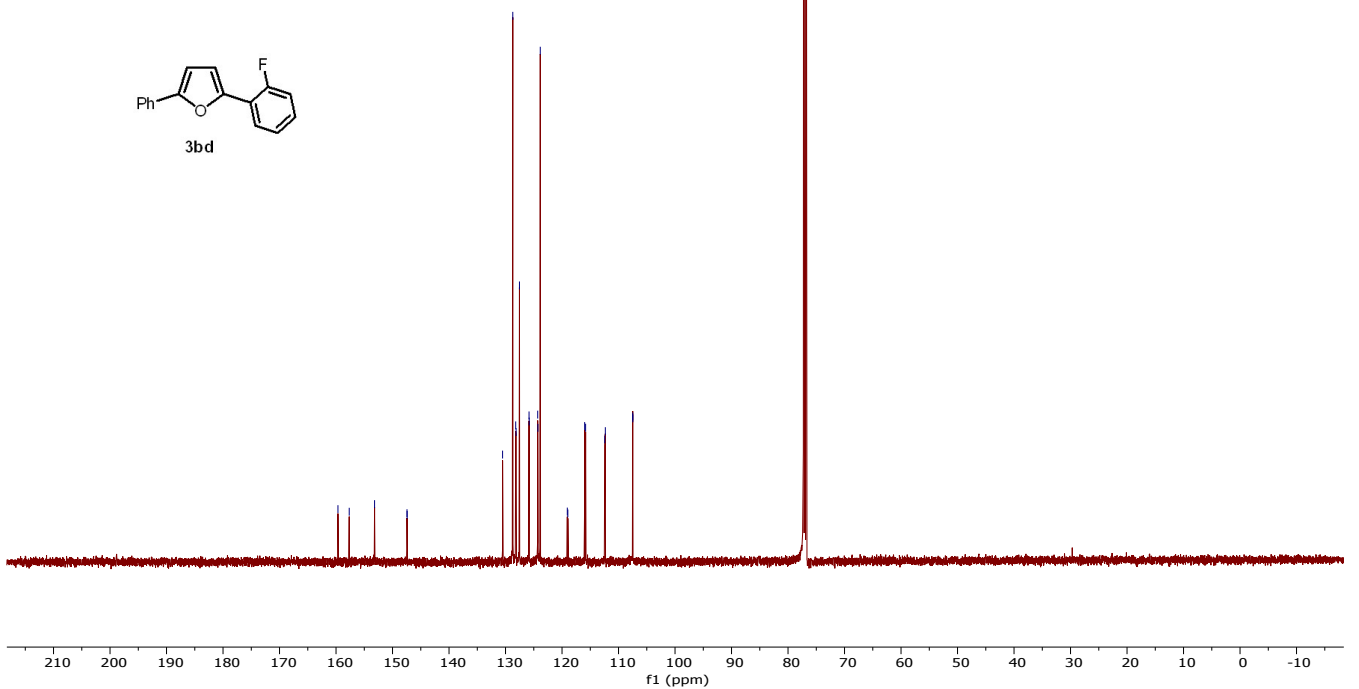

8.000  
7.997  
7.984  
7.981  
7.780  
7.777  
7.762  
7.760  
7.467  
7.465  
7.451  
7.449  
7.439  
7.435  
7.423  
7.411  
7.408  
7.371  
7.369  
7.354  
7.341  
7.338  
7.316  
7.313  
7.311  
7.302  
7.299  
7.295  
7.286  
7.284  
7.281  
7.244  
7.237  
7.226  
7.223  
7.211  
7.208  
7.195  
7.192  
6.802  
6.795

-0.000

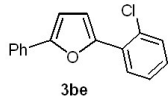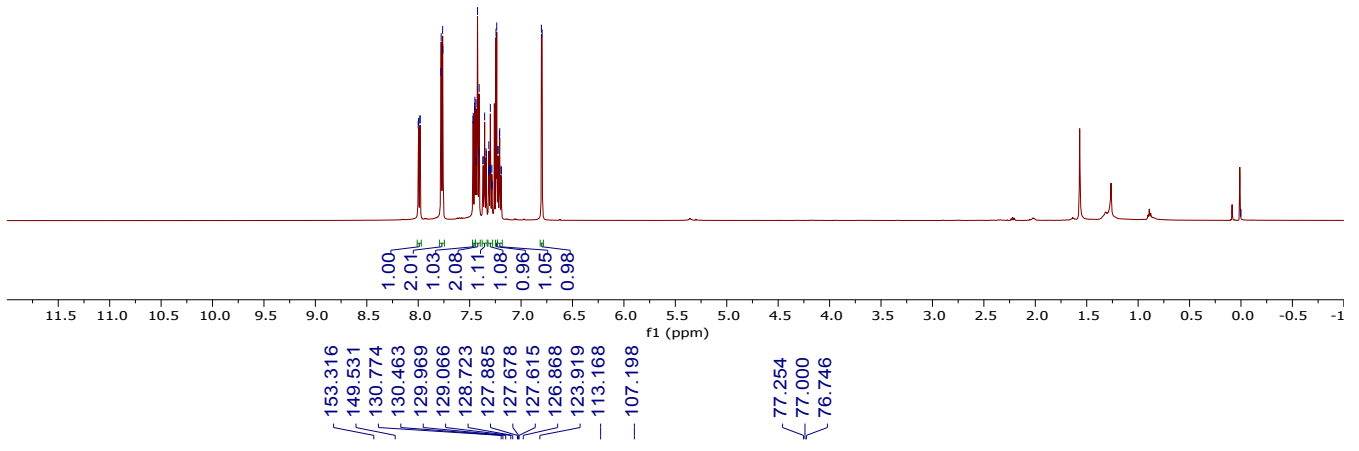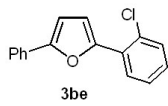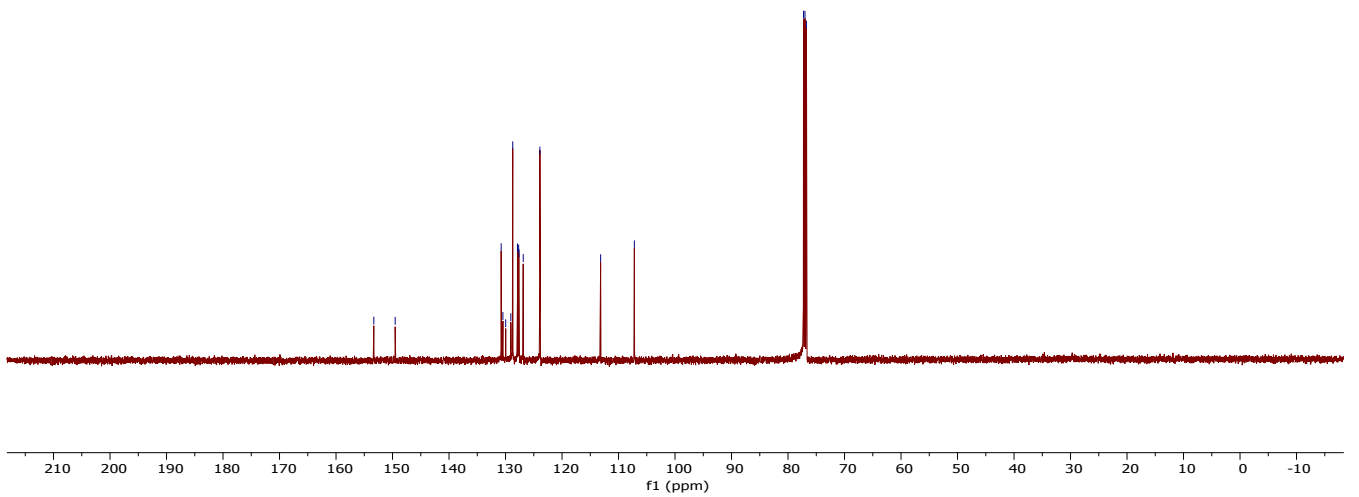

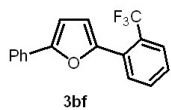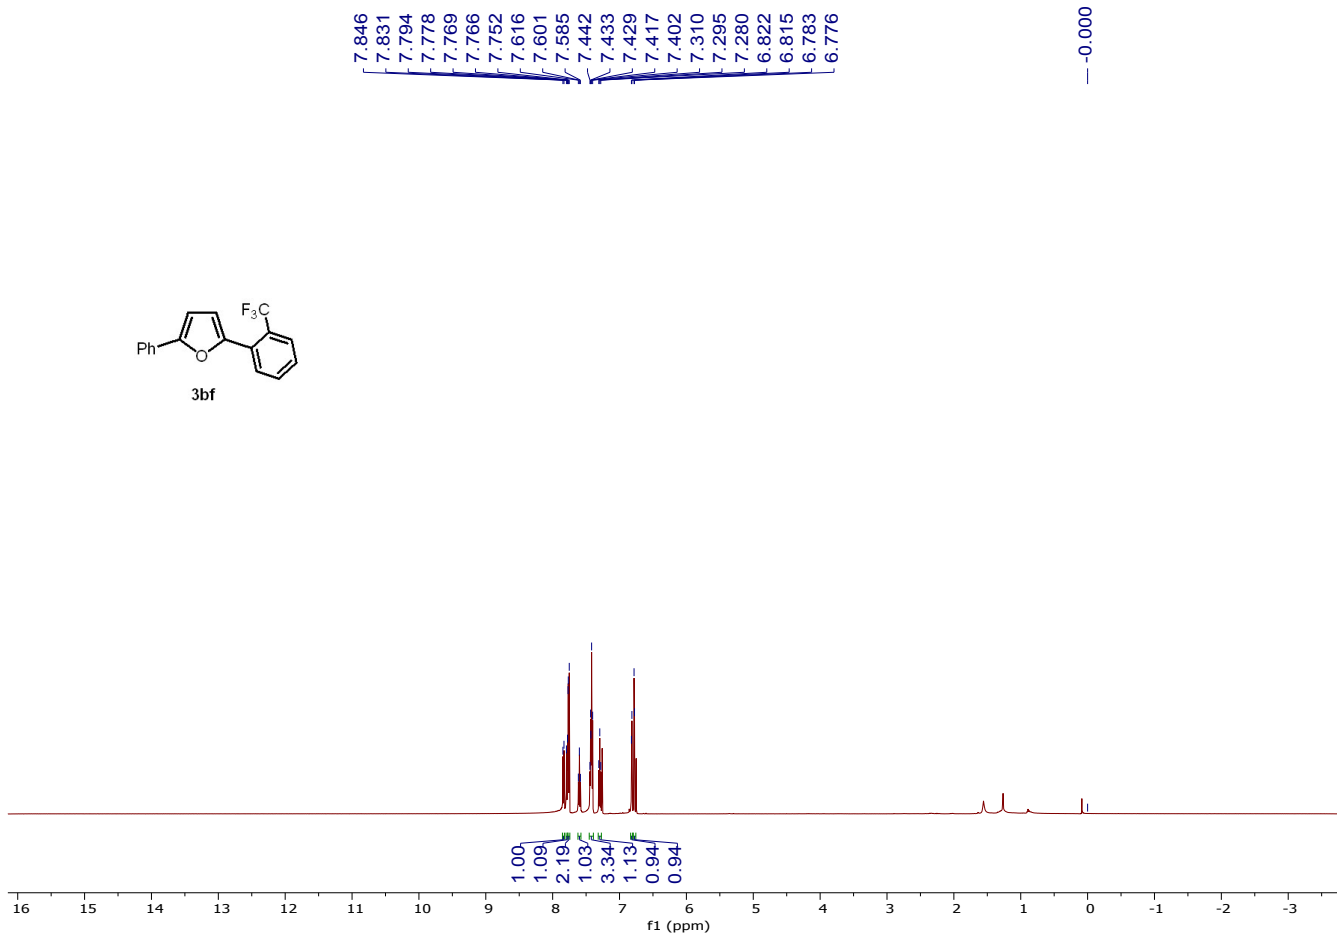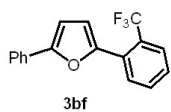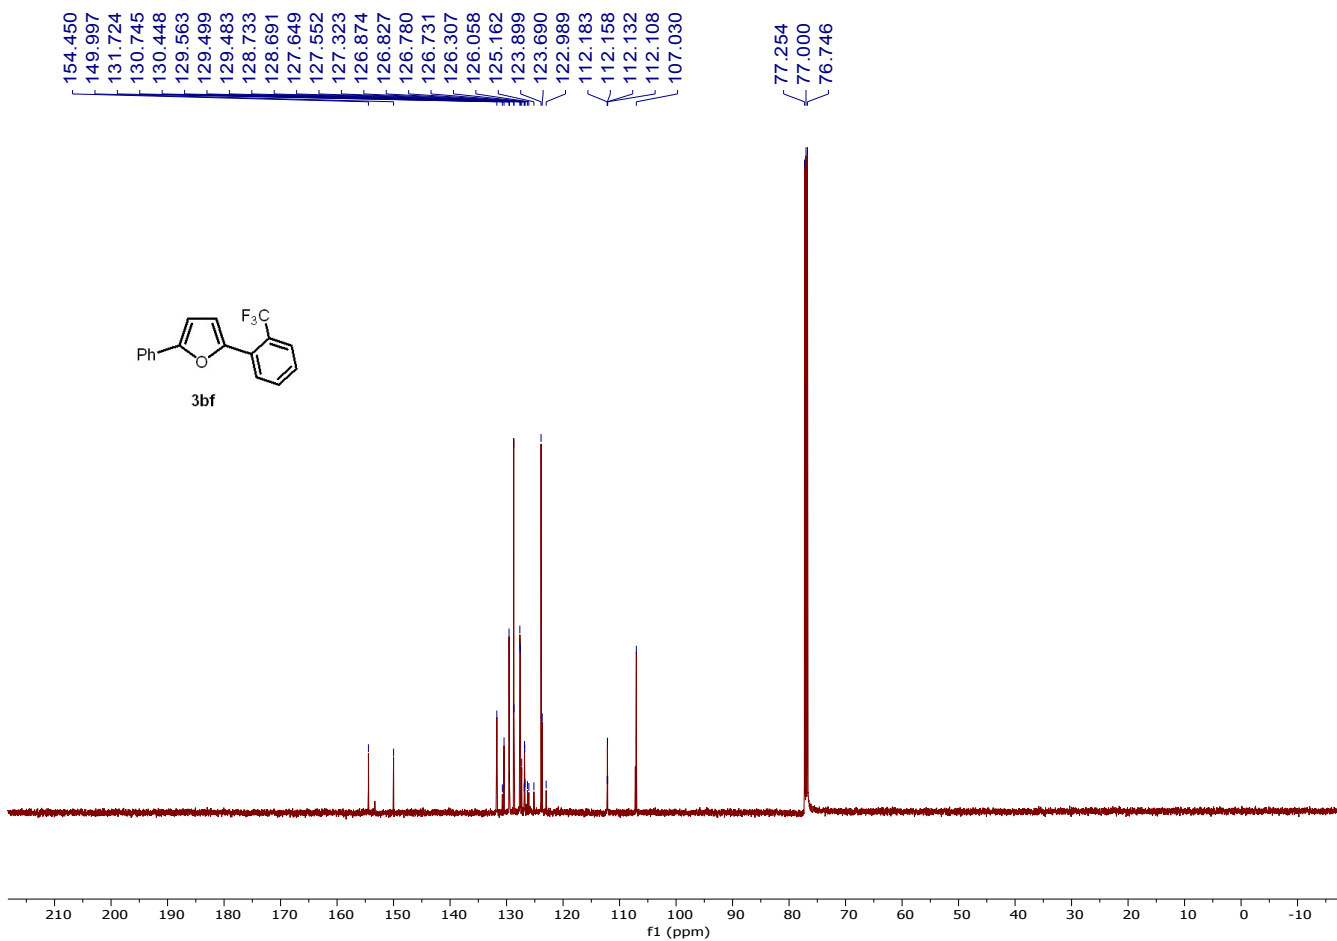

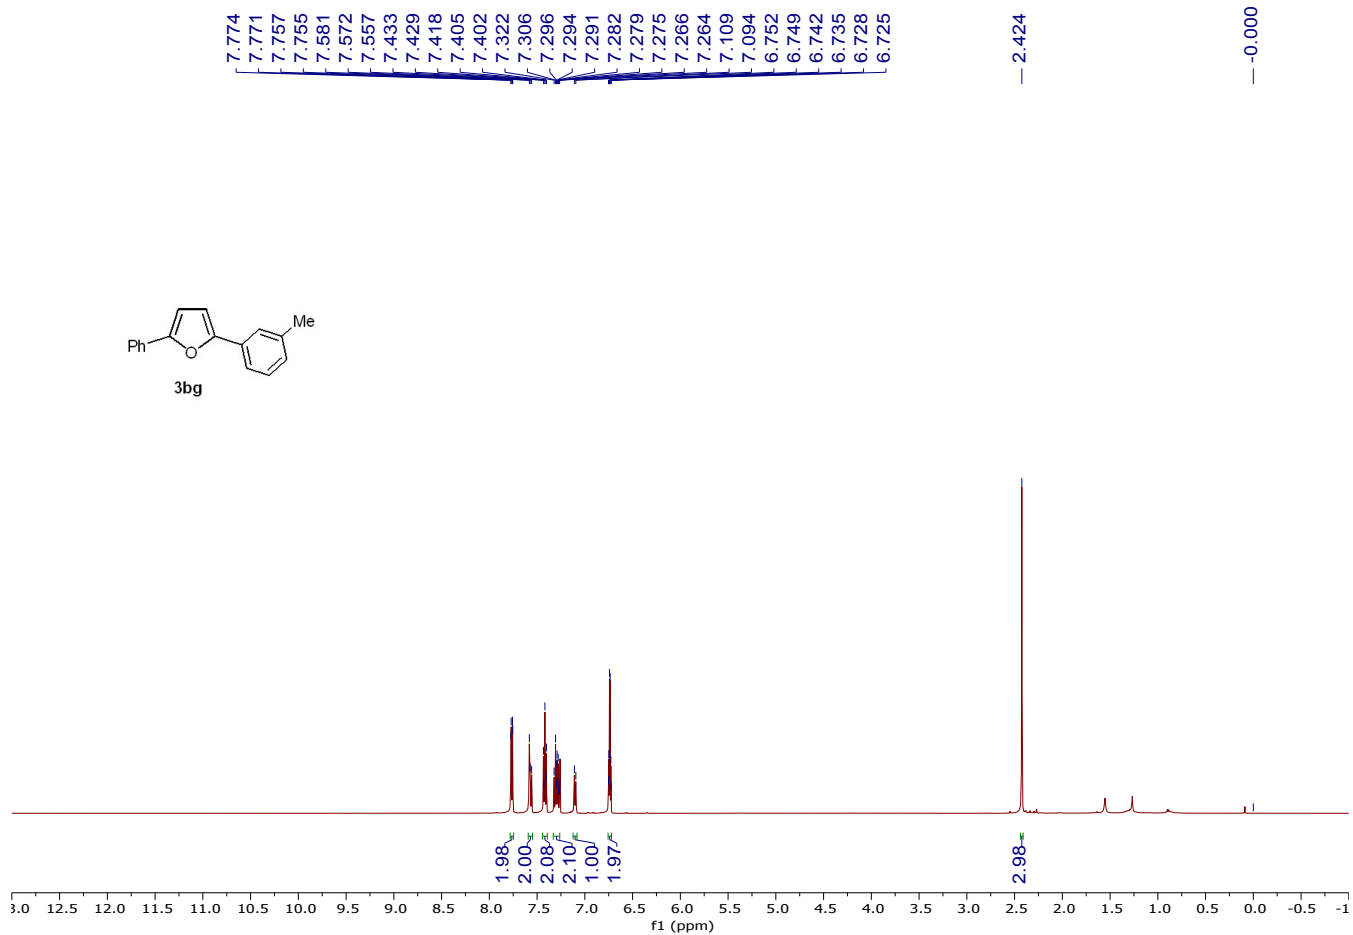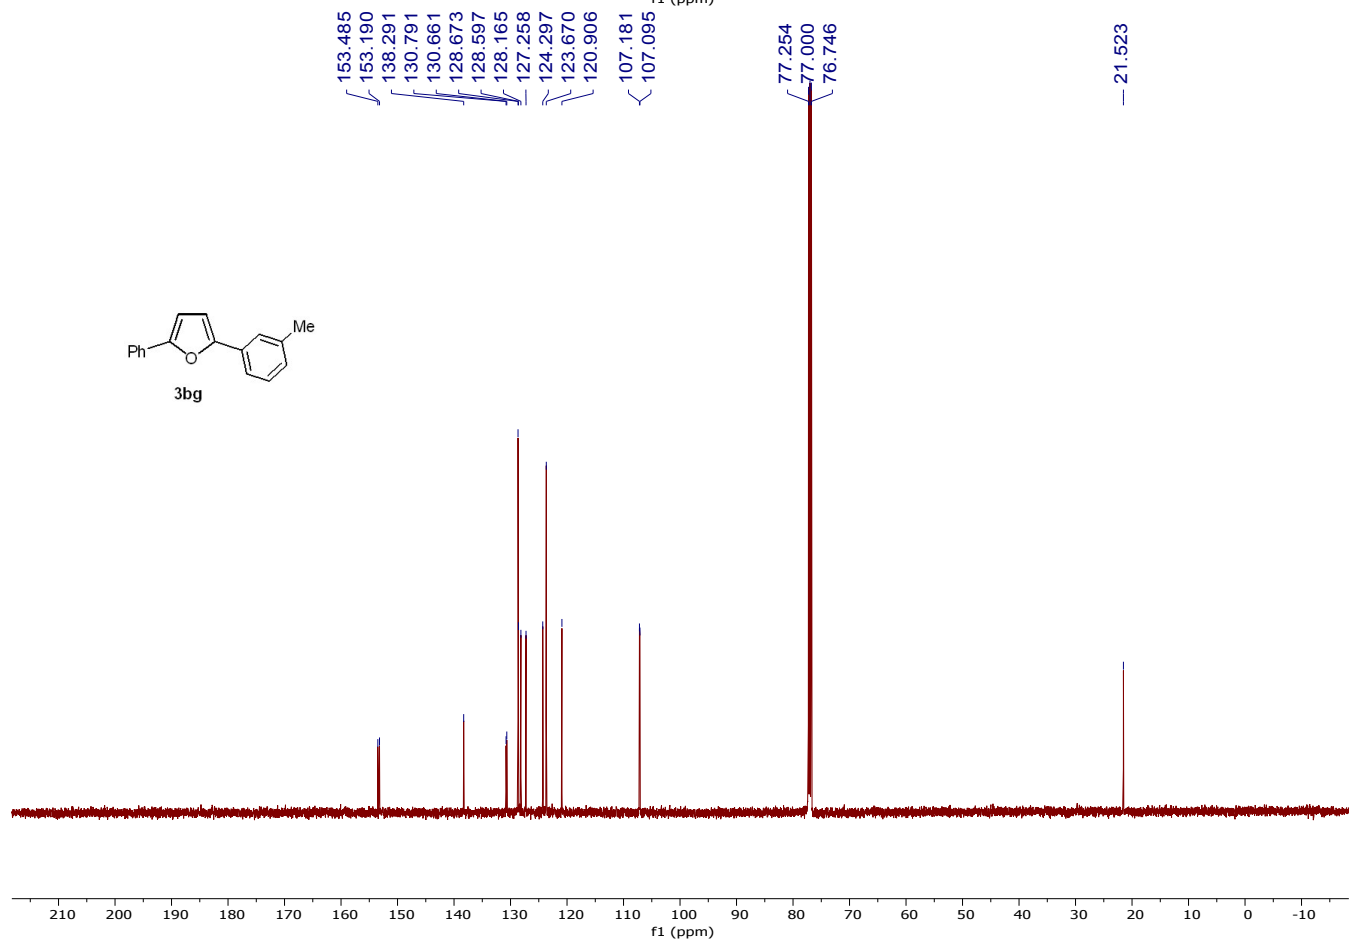

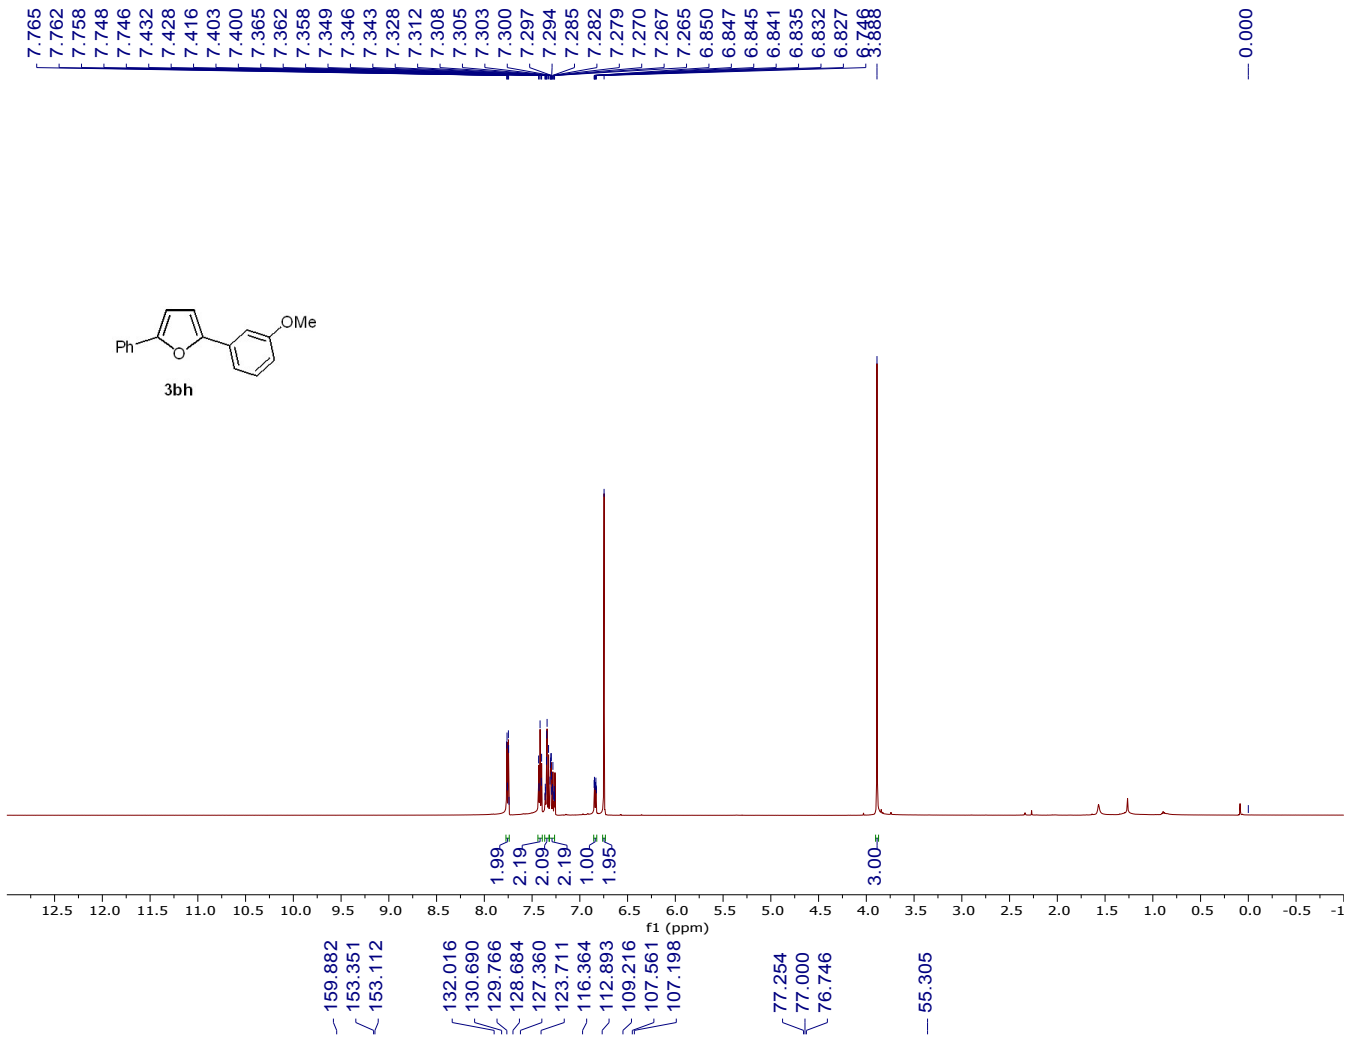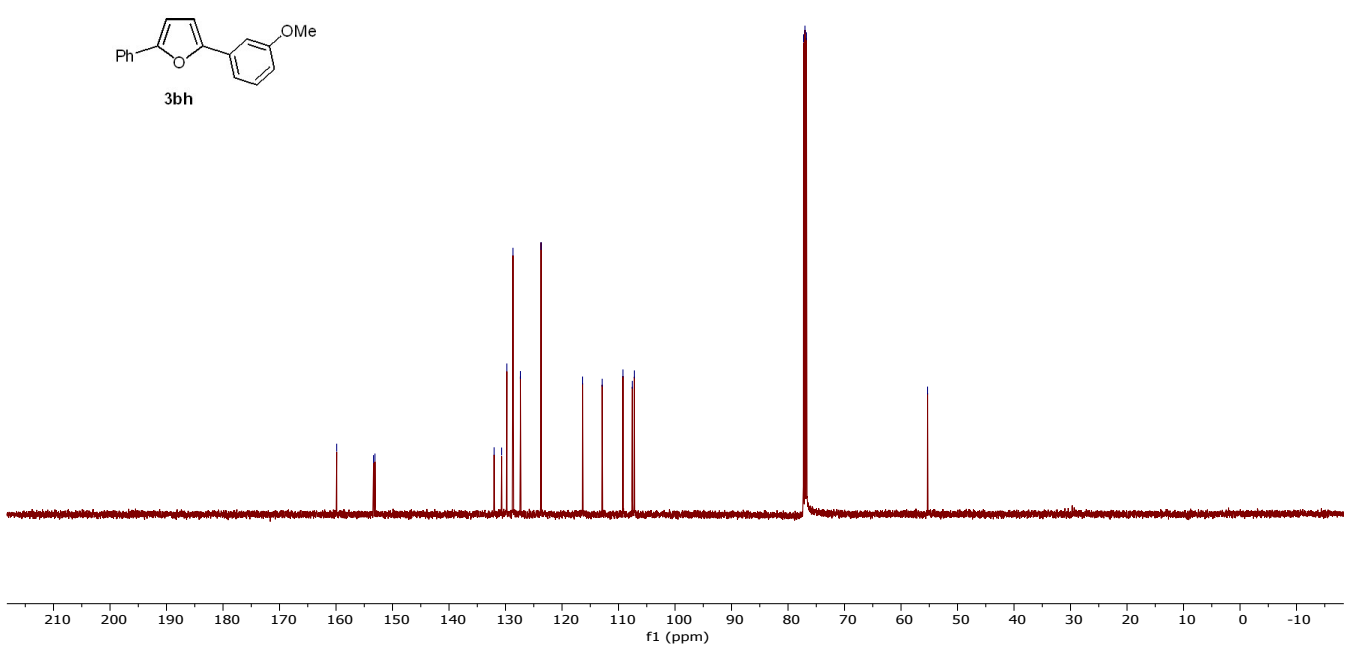

7.769  
7.763  
7.760  
7.756  
7.746  
7.744  
7.740  
7.521  
7.505  
7.456  
7.451  
7.448  
7.439  
7.435  
7.431  
7.427  
7.423  
7.415  
7.411  
7.407  
7.387  
7.375  
7.371  
7.359  
7.355  
7.343  
7.314  
7.311  
7.309  
7.297  
7.284  
7.282  
7.279  
6.985  
6.983  
6.980  
6.967  
6.963  
6.951  
6.950  
6.946  
6.945  
6.772  
6.769  
6.765  
6.753  
6.749  
6.746

— 0.000

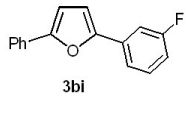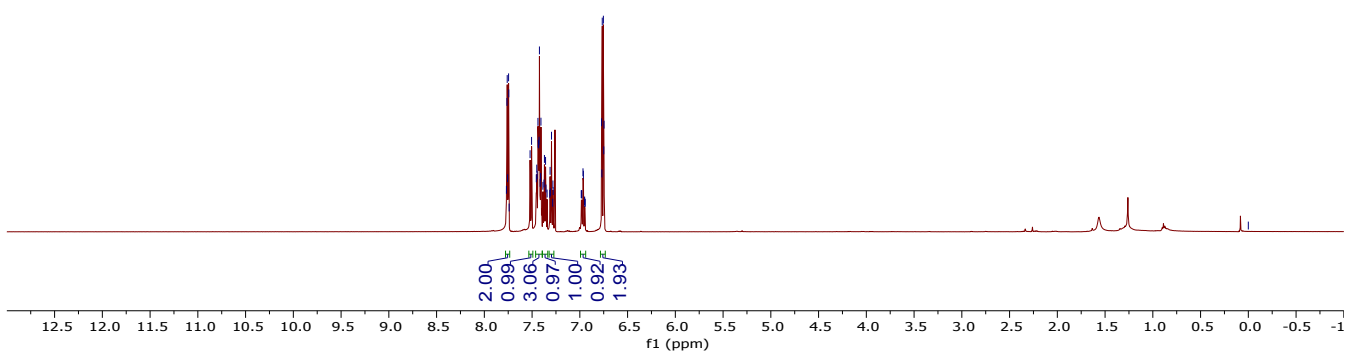

164.151  
162.202  
153.812  
152.059  
152.035  
132.790  
132.723  
130.463  
130.308  
130.240  
128.736  
127.603  
123.801  
119.314  
119.291  
114.118  
113.948  
110.584  
110.397  
108.259  
107.252  
77.254  
77.000  
76.746

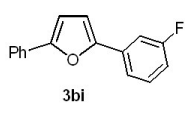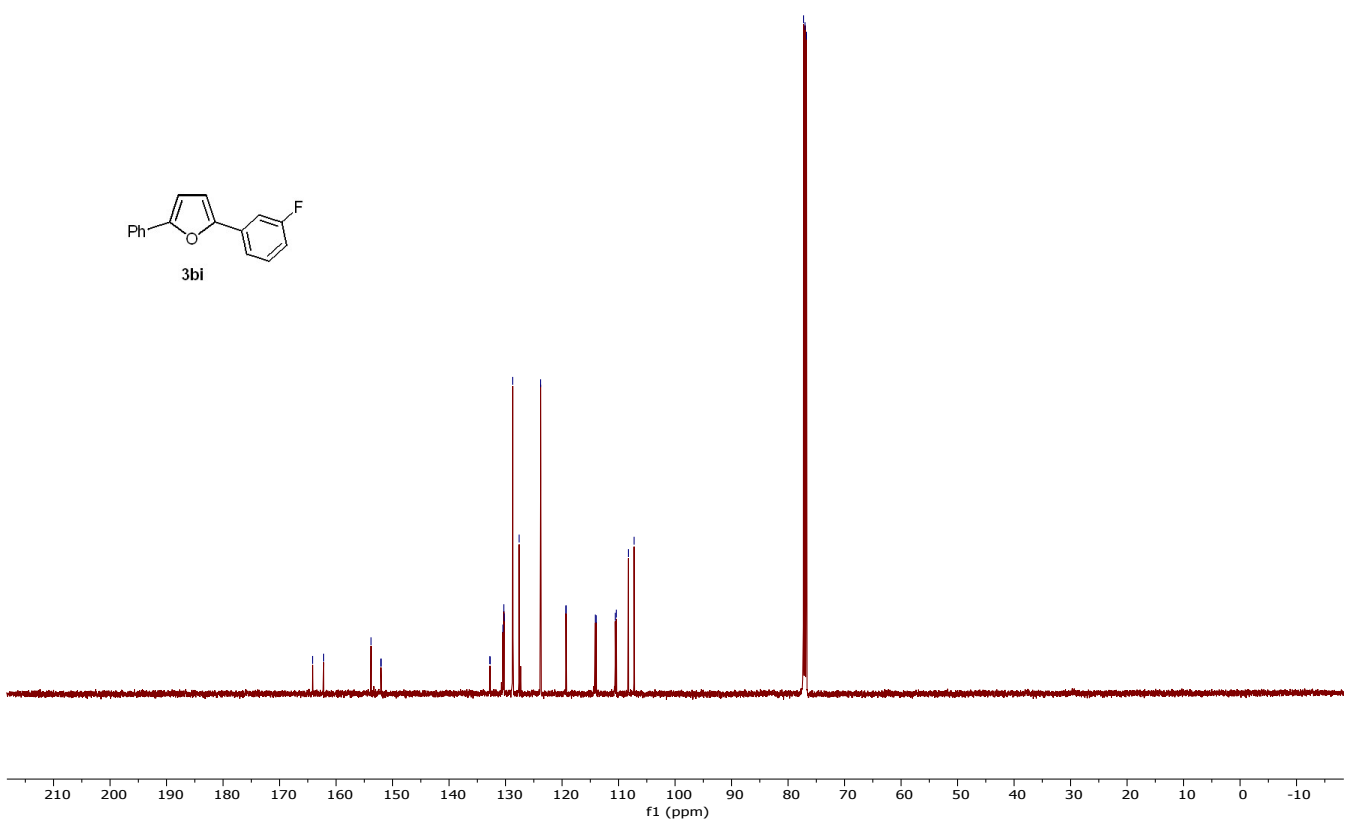

7.769  
7.763  
7.761  
7.757  
7.746  
7.744  
7.733  
7.730  
7.726  
7.619  
7.616  
7.613  
7.603  
7.600  
7.598  
7.442  
7.439  
7.435  
7.431  
7.424  
7.416  
7.411  
7.408  
7.347  
7.331  
7.315  
7.313  
7.310  
7.301  
7.298  
7.295  
7.286  
7.283  
7.280  
7.248  
7.246  
7.244  
7.242  
7.232  
7.230  
7.228  
7.226  
6.770  
6.763  
6.750  
6.743

-0.000

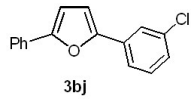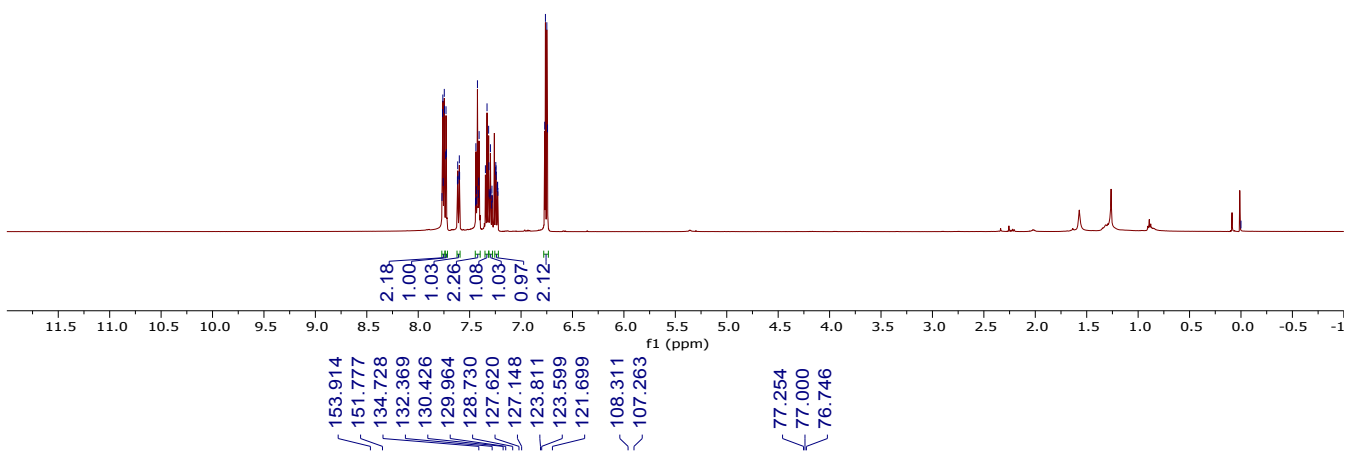

153.914  
 151.777  
 134.728  
 132.369  
 130.426  
 129.964  
 128.730  
 127.620  
 127.148  
 123.811  
 123.599  
 121.699  
 108.311  
 107.263  
 77.254  
 77.000  
 76.746

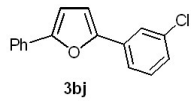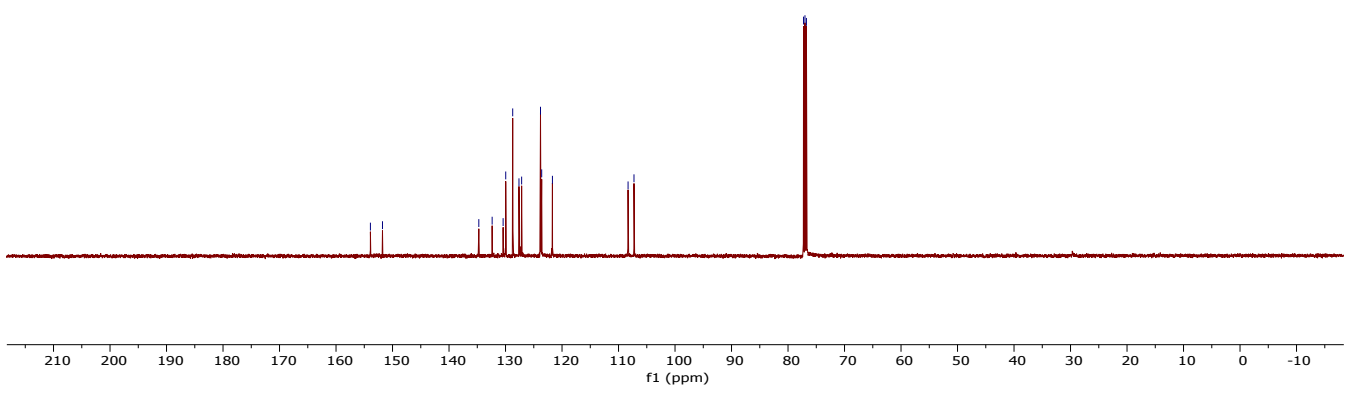

-0.000

7.888  
7.885  
7.881  
7.761  
7.758  
7.748  
7.744  
7.742  
7.660  
7.647  
7.644  
7.438  
7.423  
7.411  
7.407  
7.399  
7.397  
7.383  
7.381  
7.379  
7.312  
7.297  
7.282  
7.267  
6.764  
6.757  
6.747  
6.740

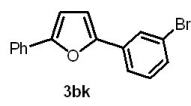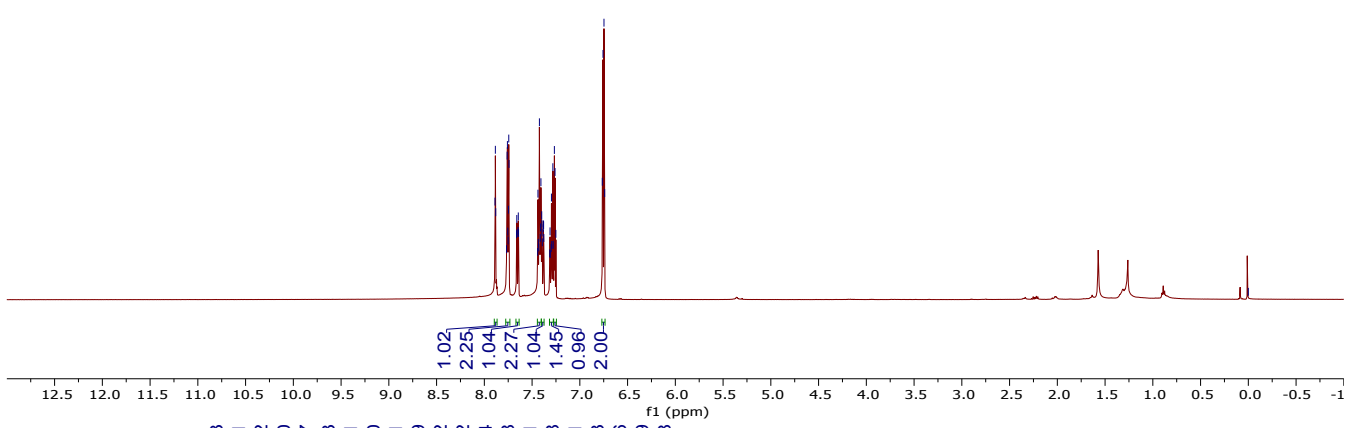

153.953  
151.611  
132.622  
130.410  
130.387  
130.223  
130.051  
128.730  
128.681  
127.629  
127.312  
126.612  
126.484  
123.818  
123.681  
122.898  
122.141  
108.393  
108.346  
107.269  
107.198  
77.254  
77.000  
76.746

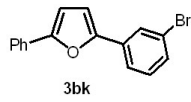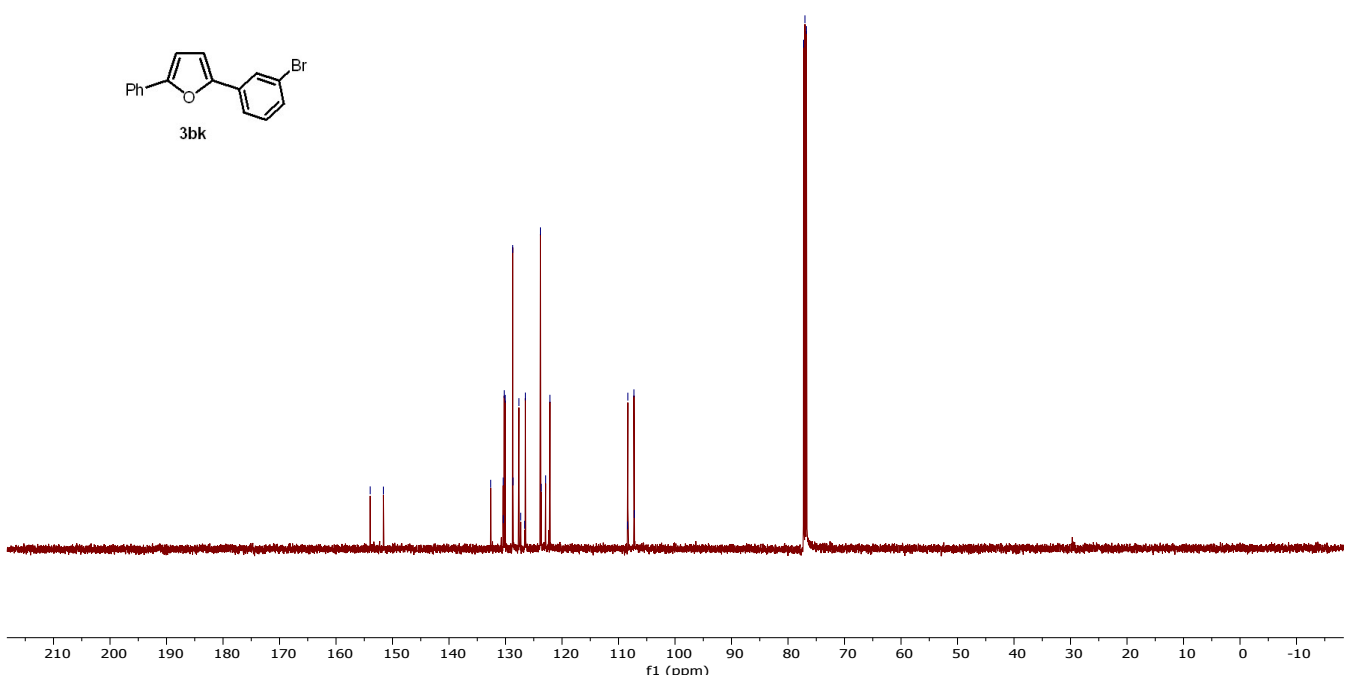



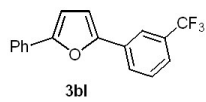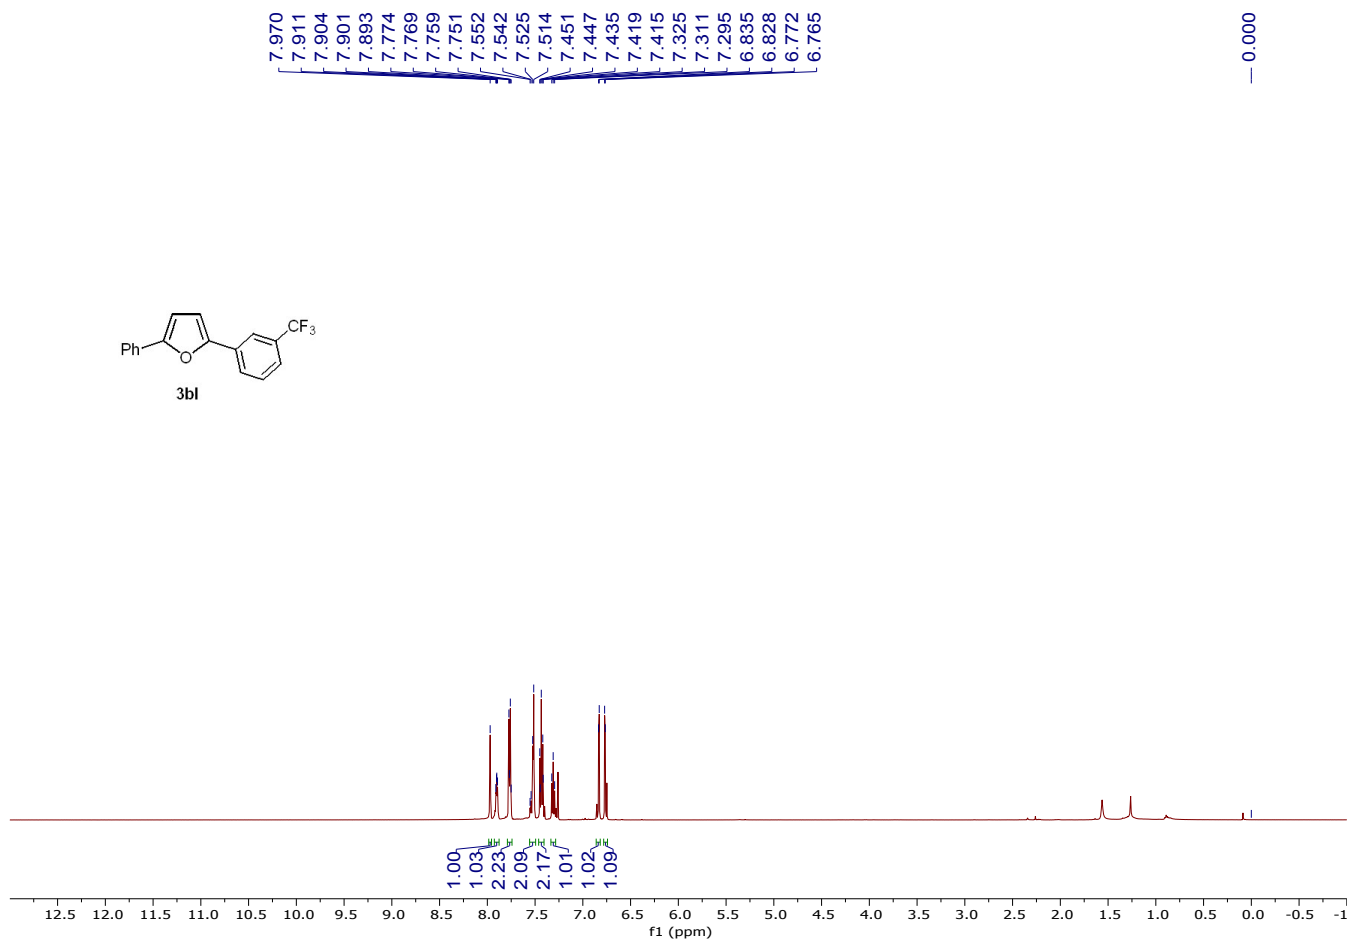

— 0.000

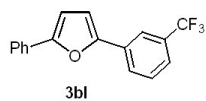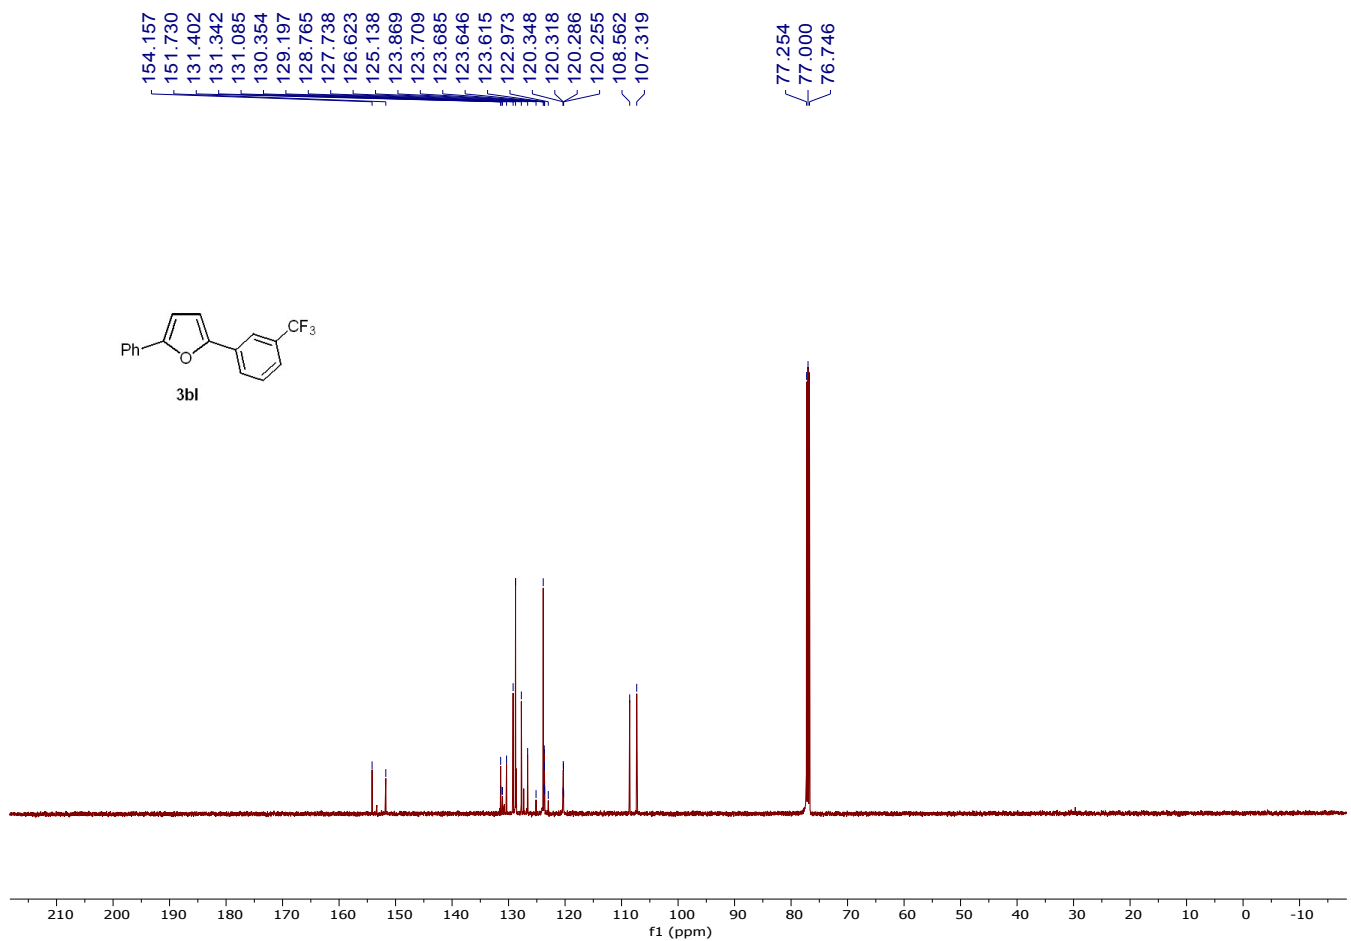

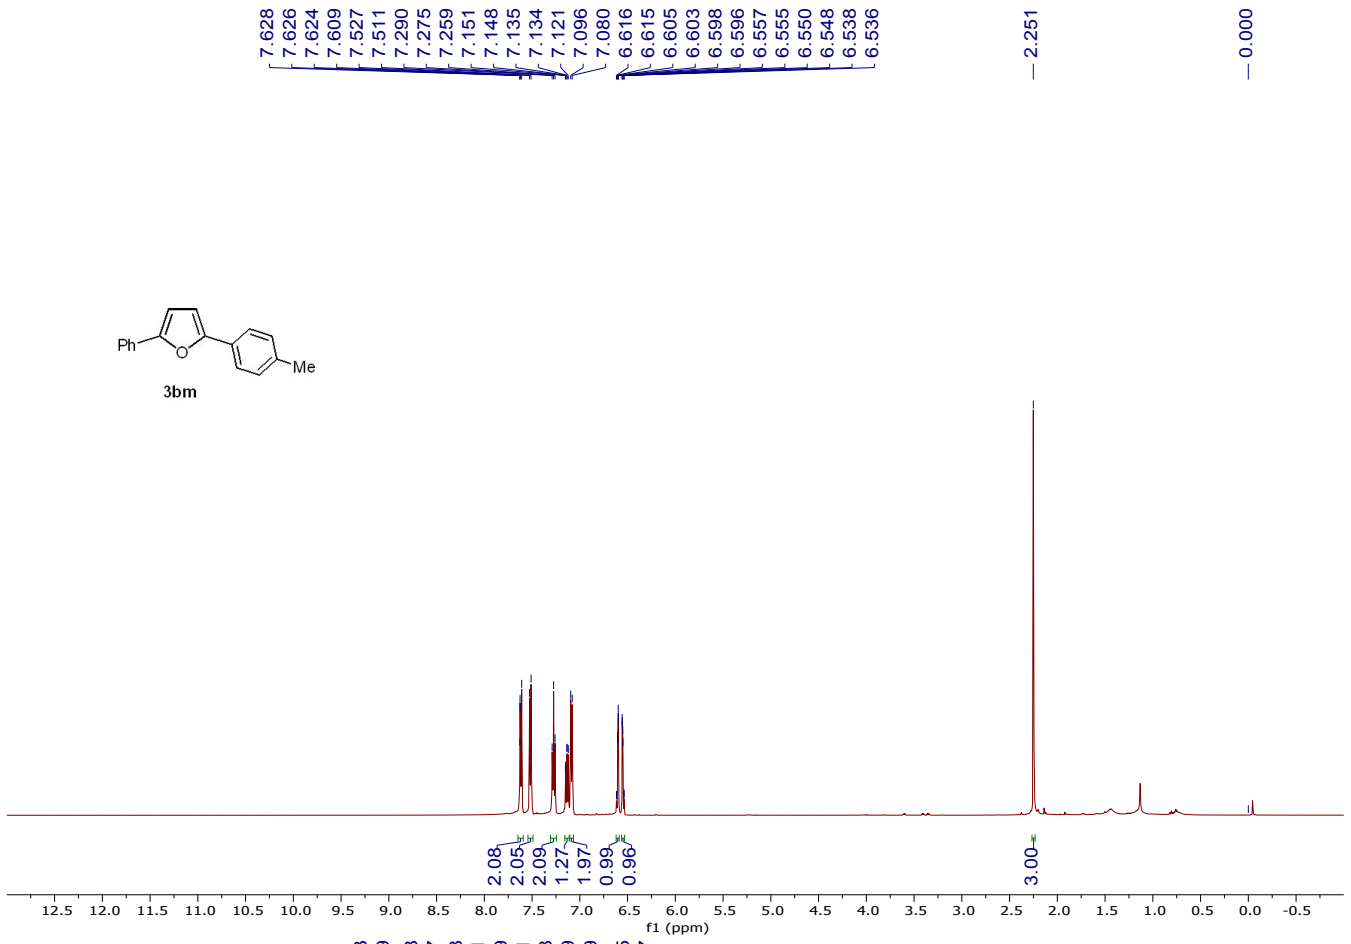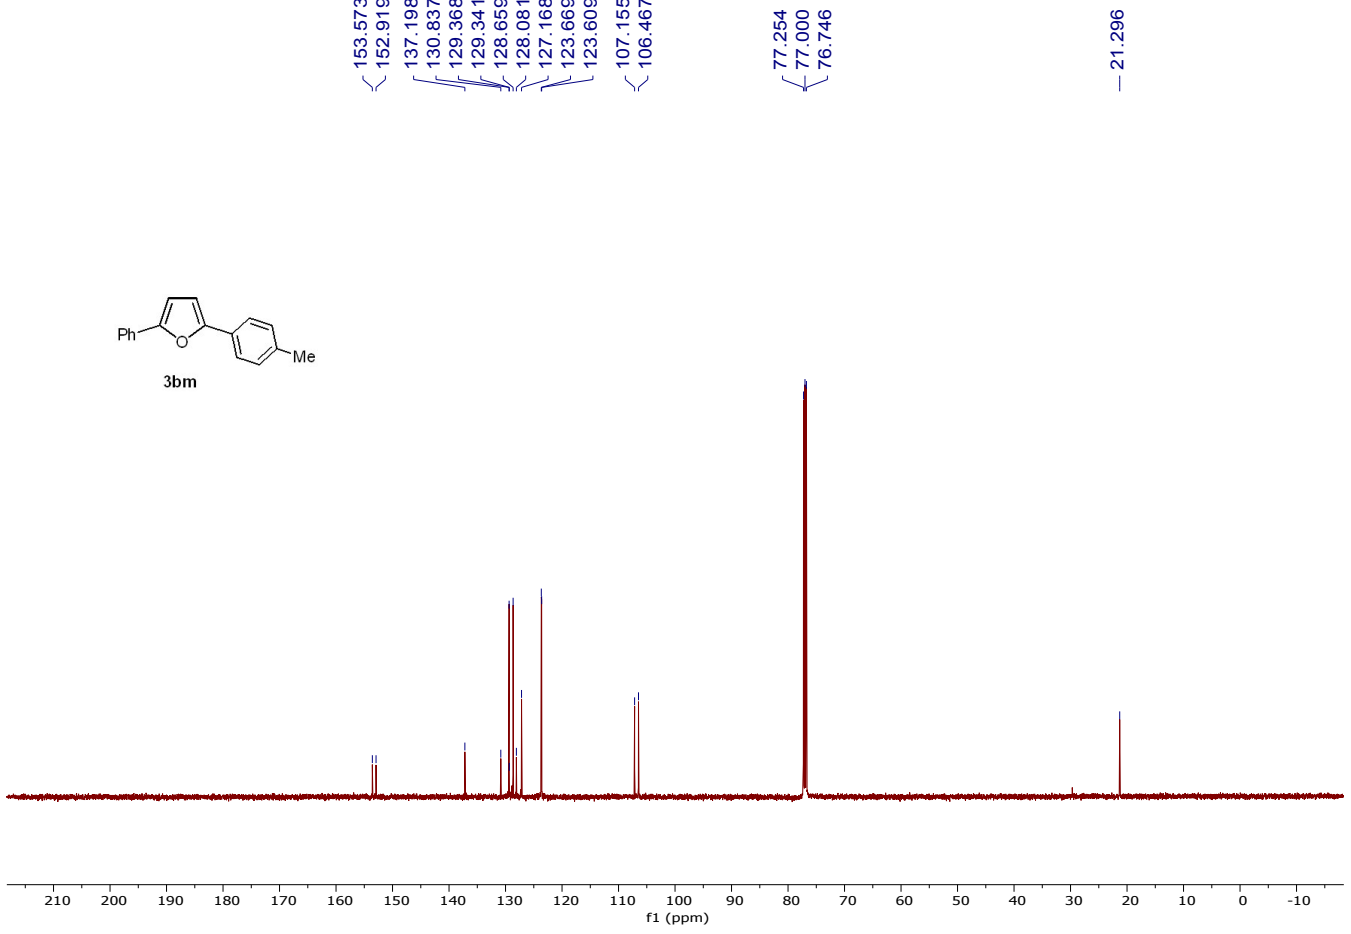

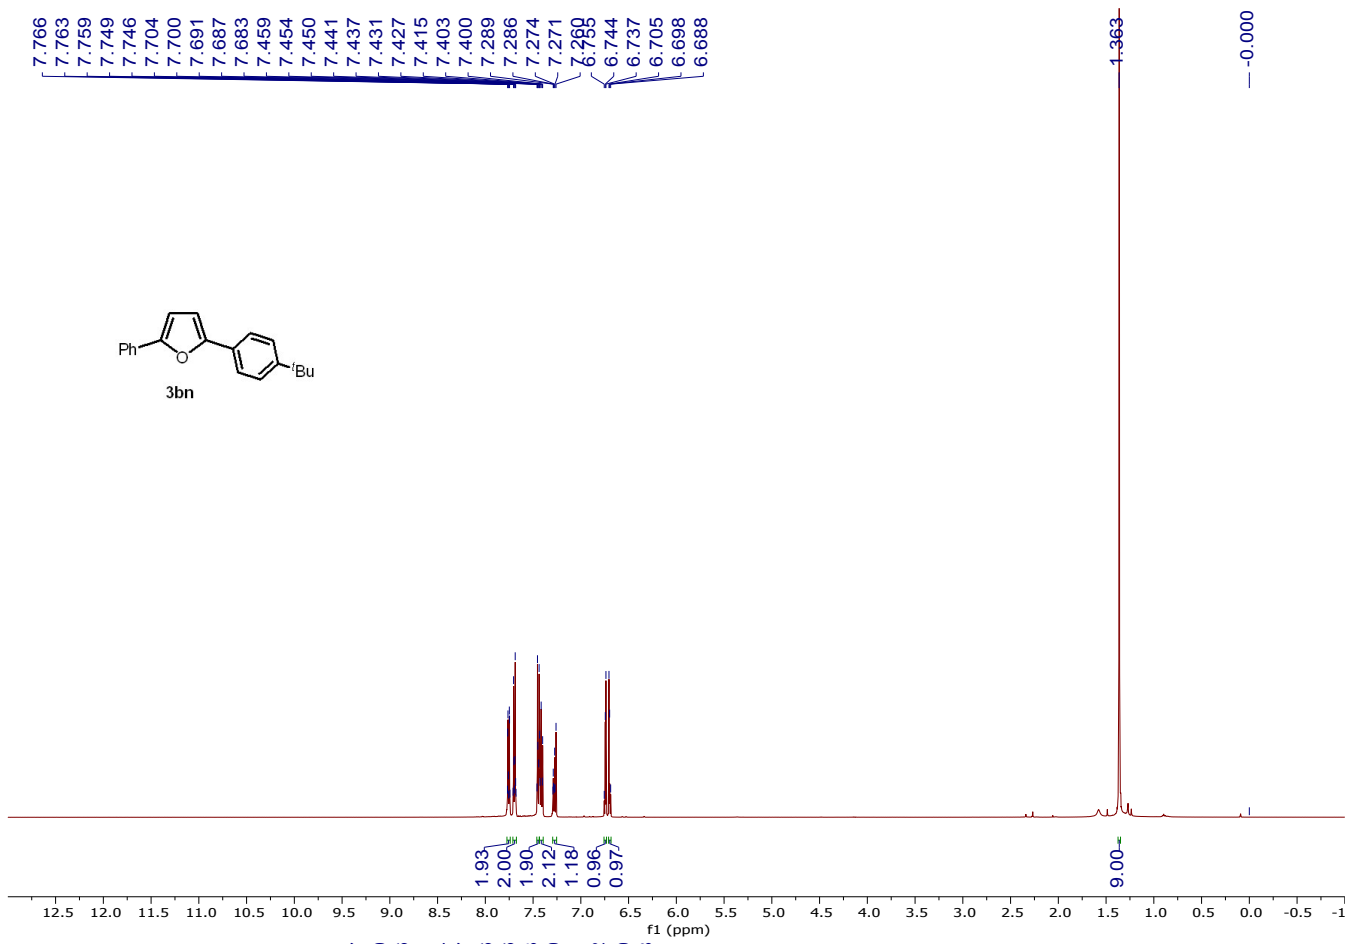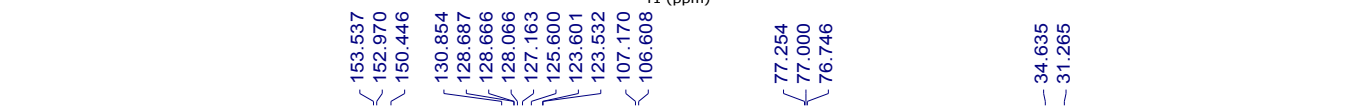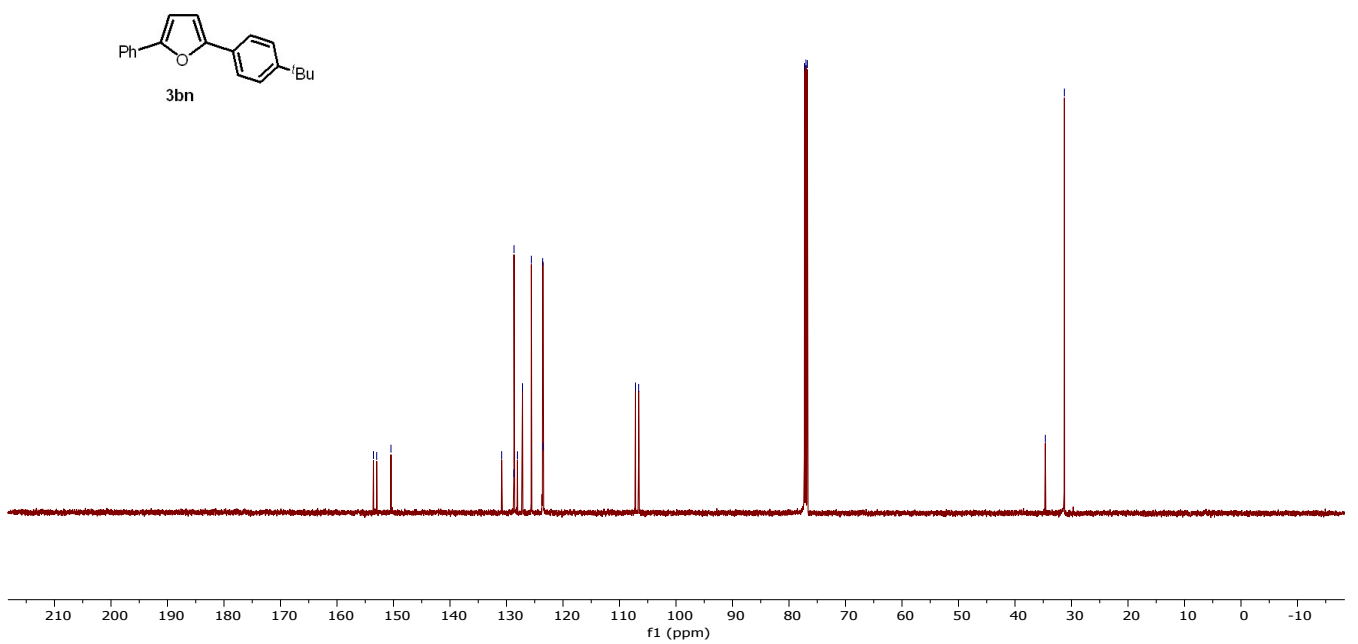

7.756  
7.754  
7.750  
7.739  
7.733  
7.729  
7.720  
7.716  
7.710  
7.429  
7.413  
7.398  
7.386  
7.382  
7.376  
7.371  
7.368  
7.358  
7.354  
7.349  
7.294  
7.291  
7.288  
7.276  
7.260  
7.156  
7.153  
7.151  
7.138  
7.126  
7.124  
7.121  
7.080  
7.074  
7.070  
7.065  
7.061  
7.057  
7.052  
6.747  
6.740  
6.675  
6.669

-0.000

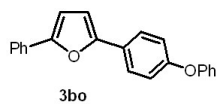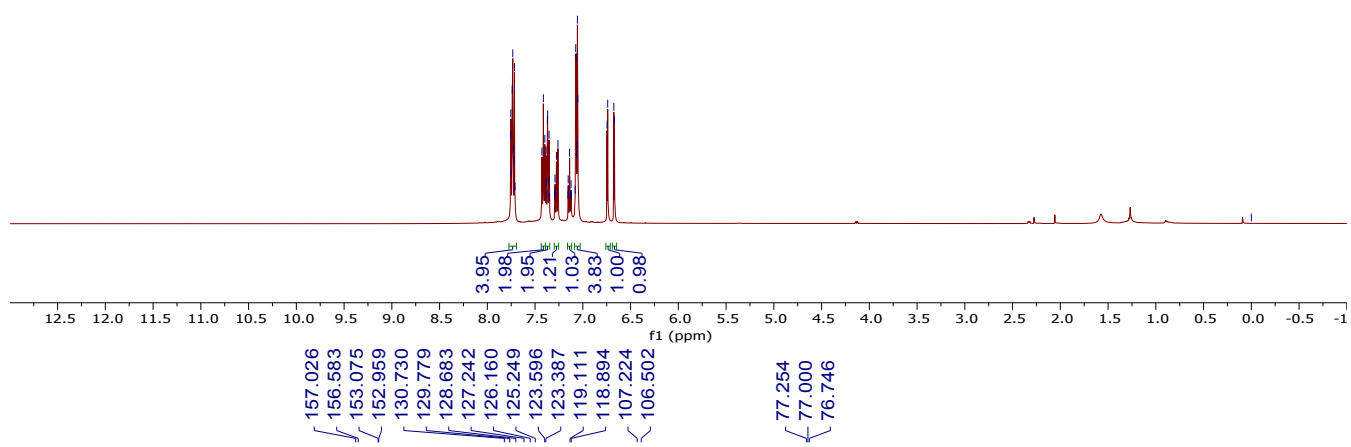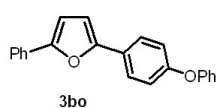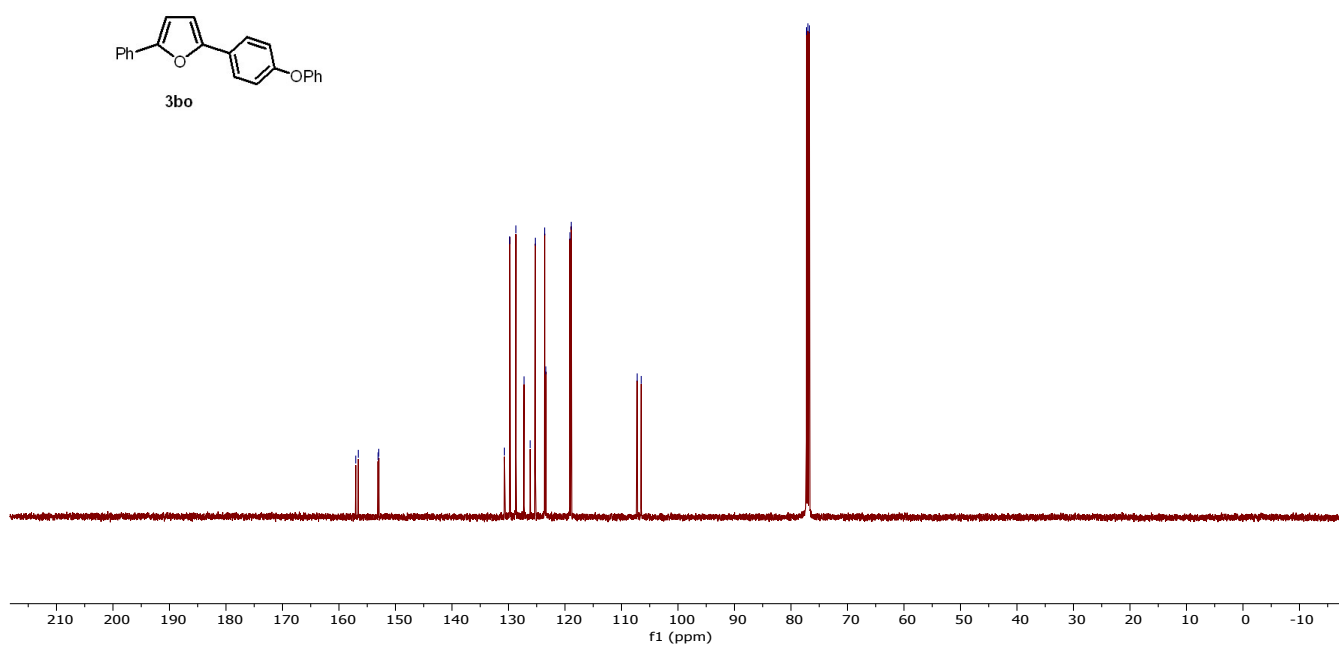

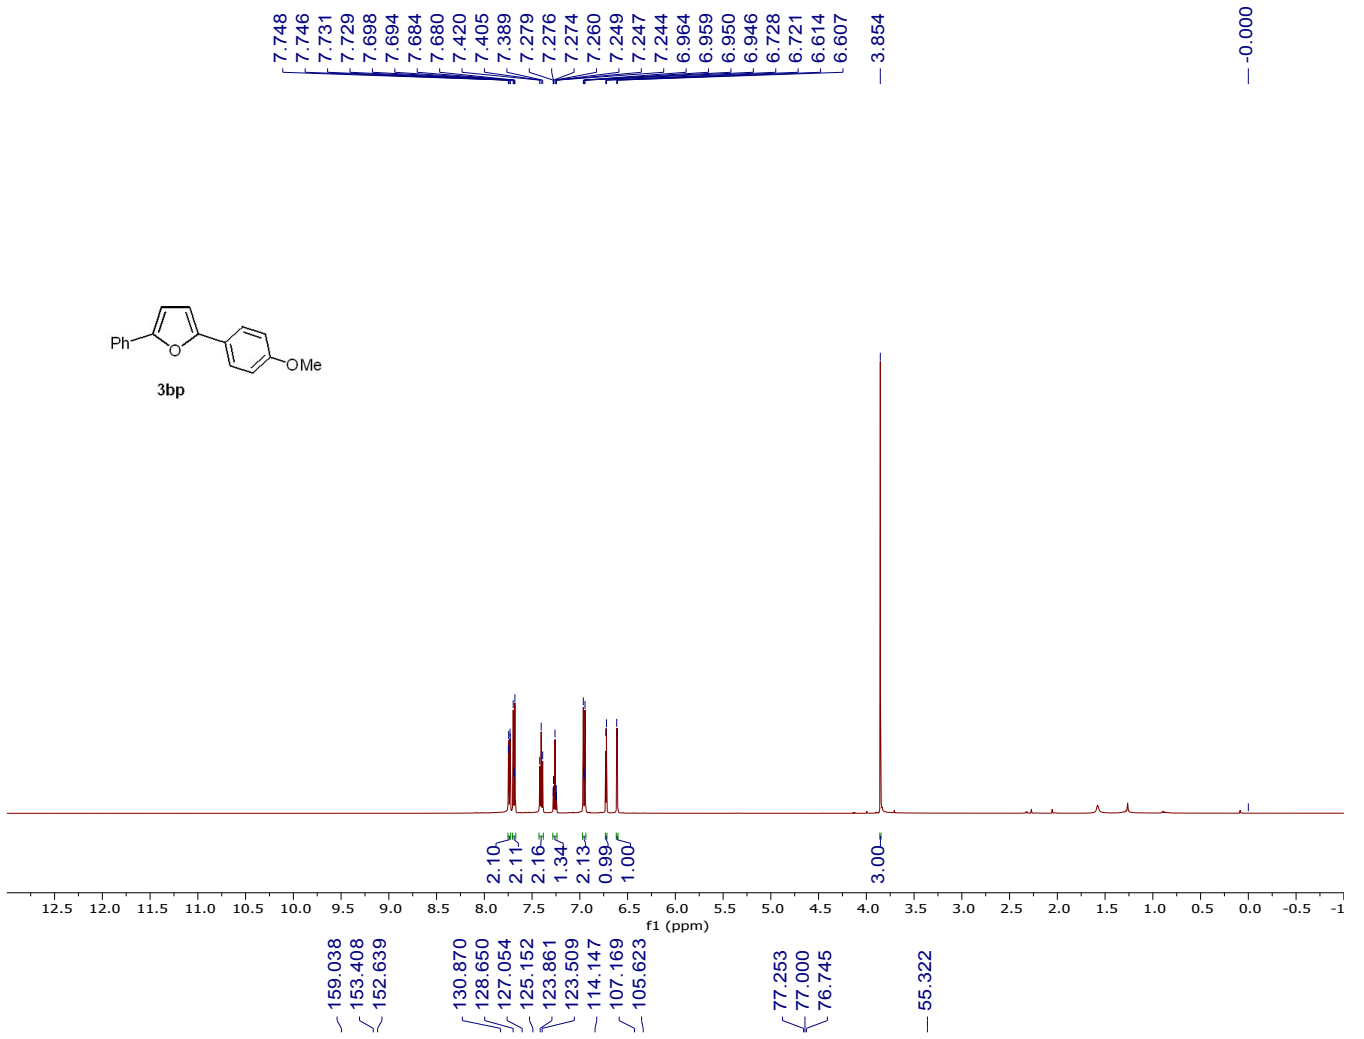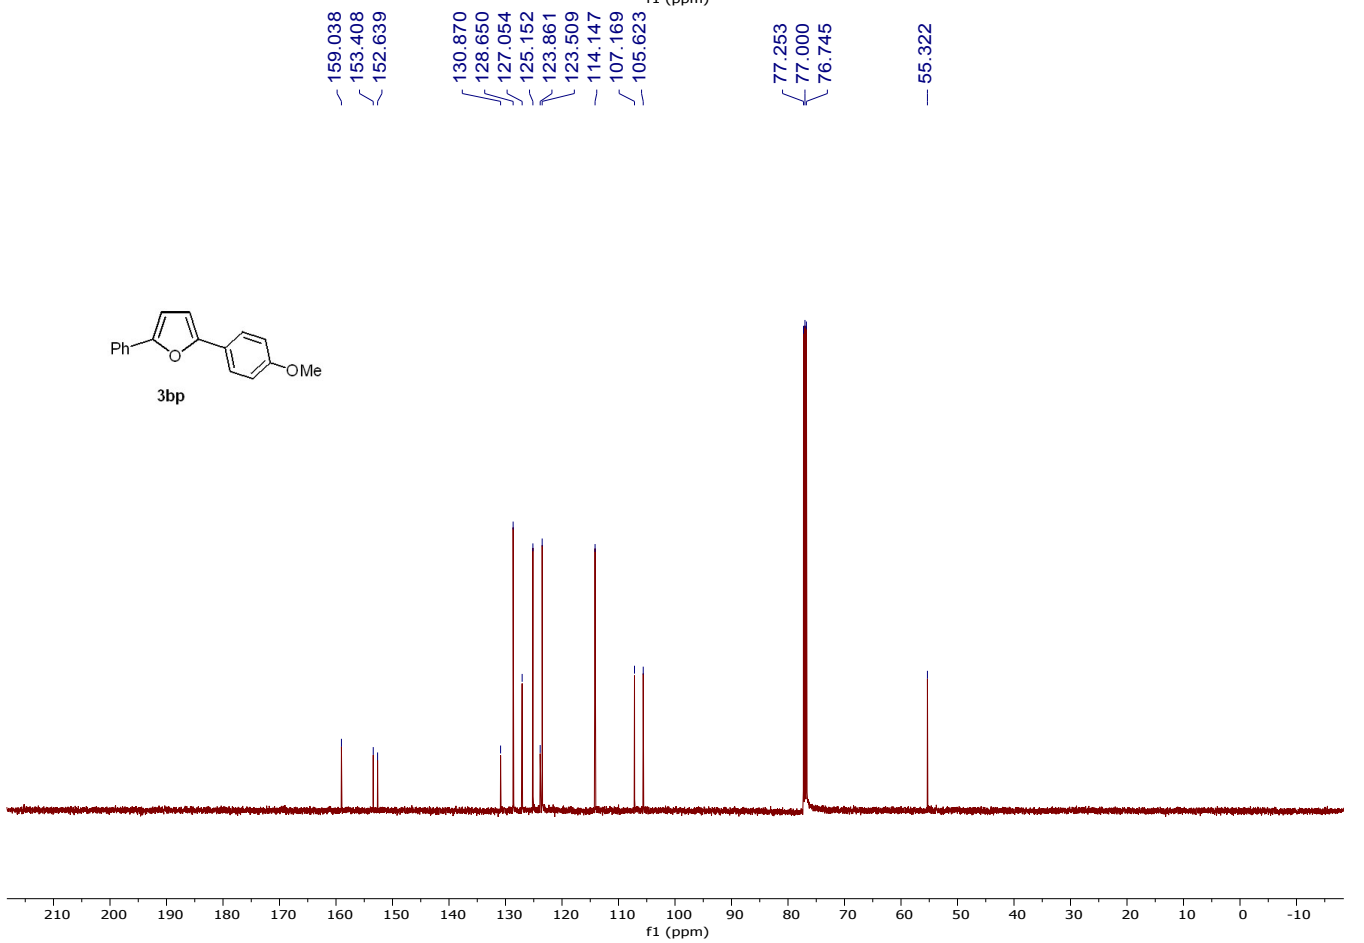

7.771  
7.768  
7.752  
7.749  
7.745  
7.735  
7.732  
7.727  
7.721  
7.714  
7.707  
7.703  
7.431  
7.427  
7.416  
7.403  
7.400  
7.301  
7.298  
7.296  
7.284  
7.271  
7.269  
7.266  
7.133  
7.126  
7.122  
7.114  
7.109  
7.105  
7.096  
7.092  
6.750  
6.739  
6.732  
6.679  
6.672  
6.661

— 0.000

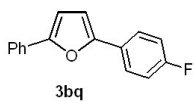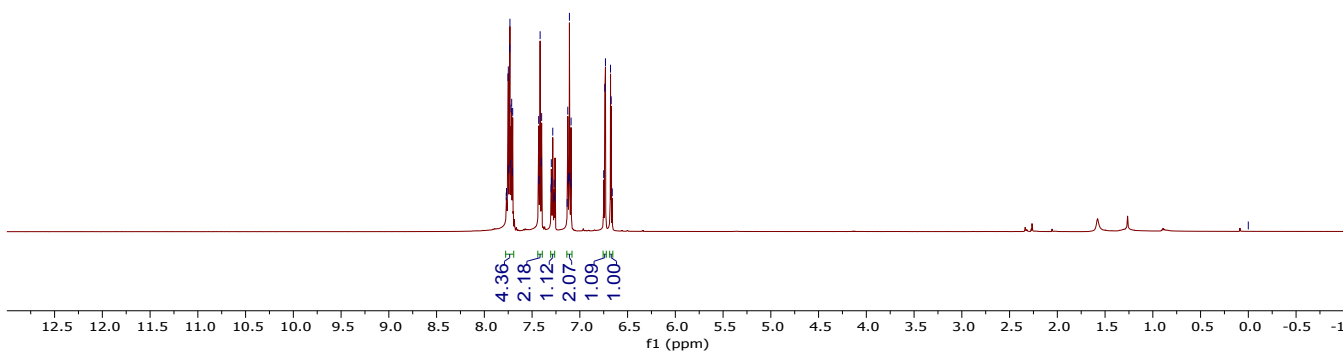

163.083  
161.118  
153.320  
152.456  
130.623  
128.701  
127.371  
127.314  
127.134  
127.106  
125.442  
125.379  
123.679  
123.650  
115.812  
115.637  
107.196  
106.856  
106.843  
77.254  
77.000  
76.746

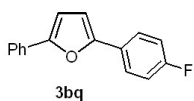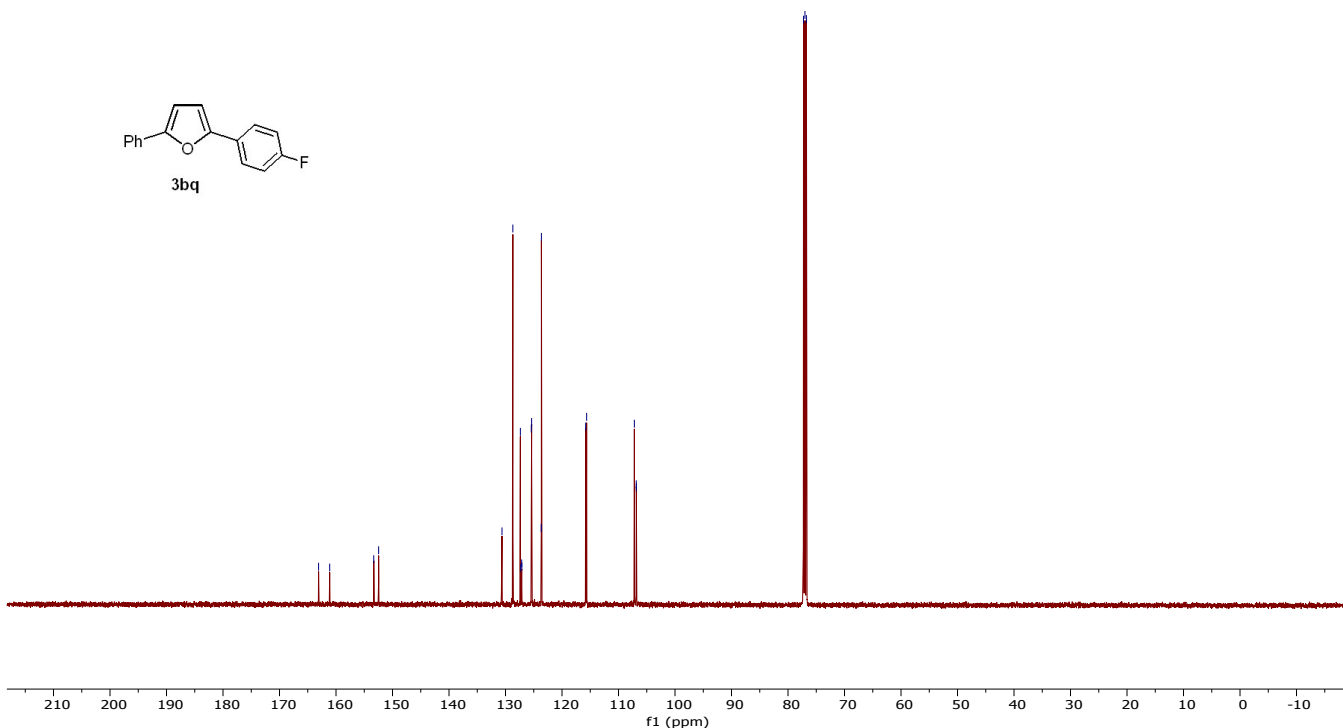

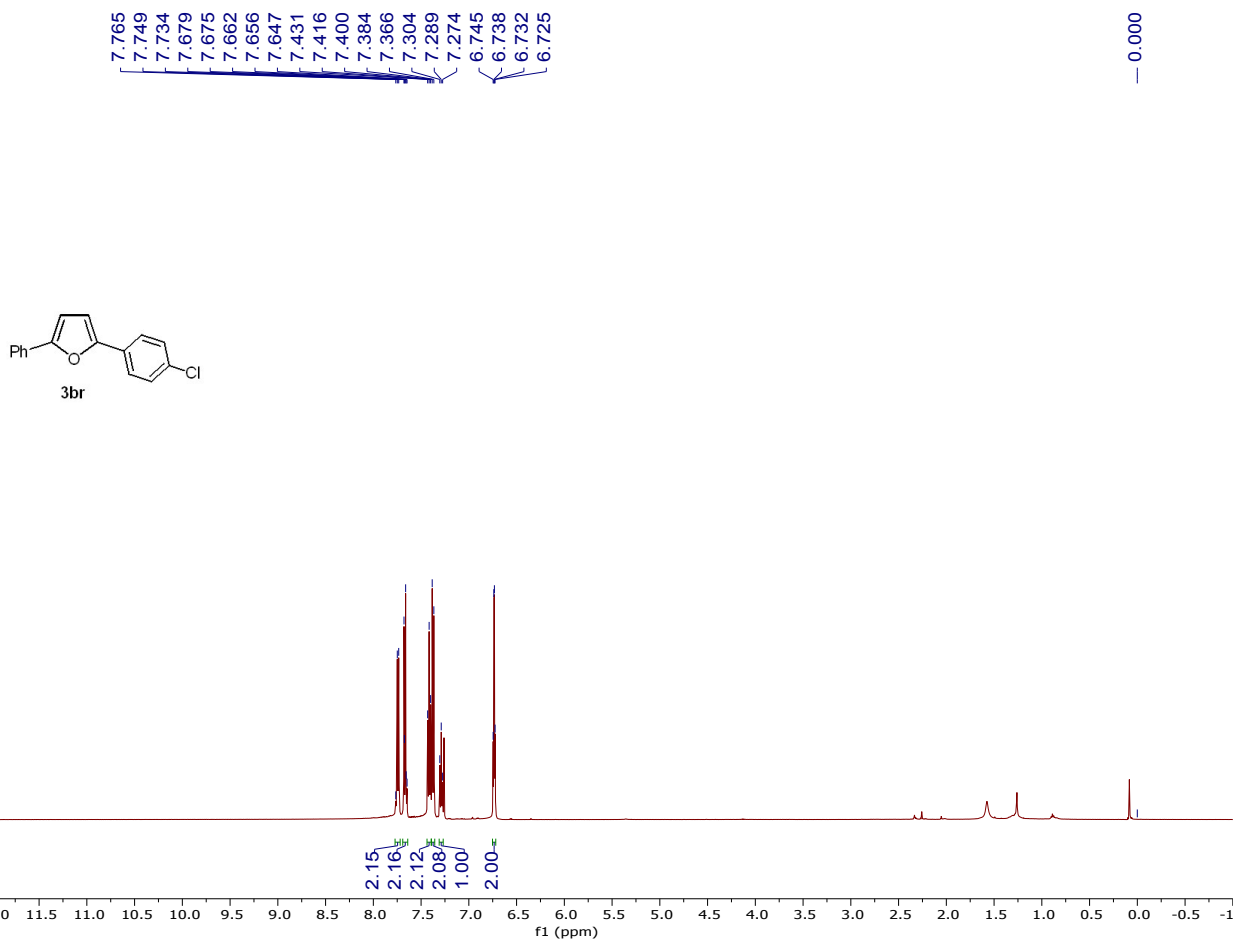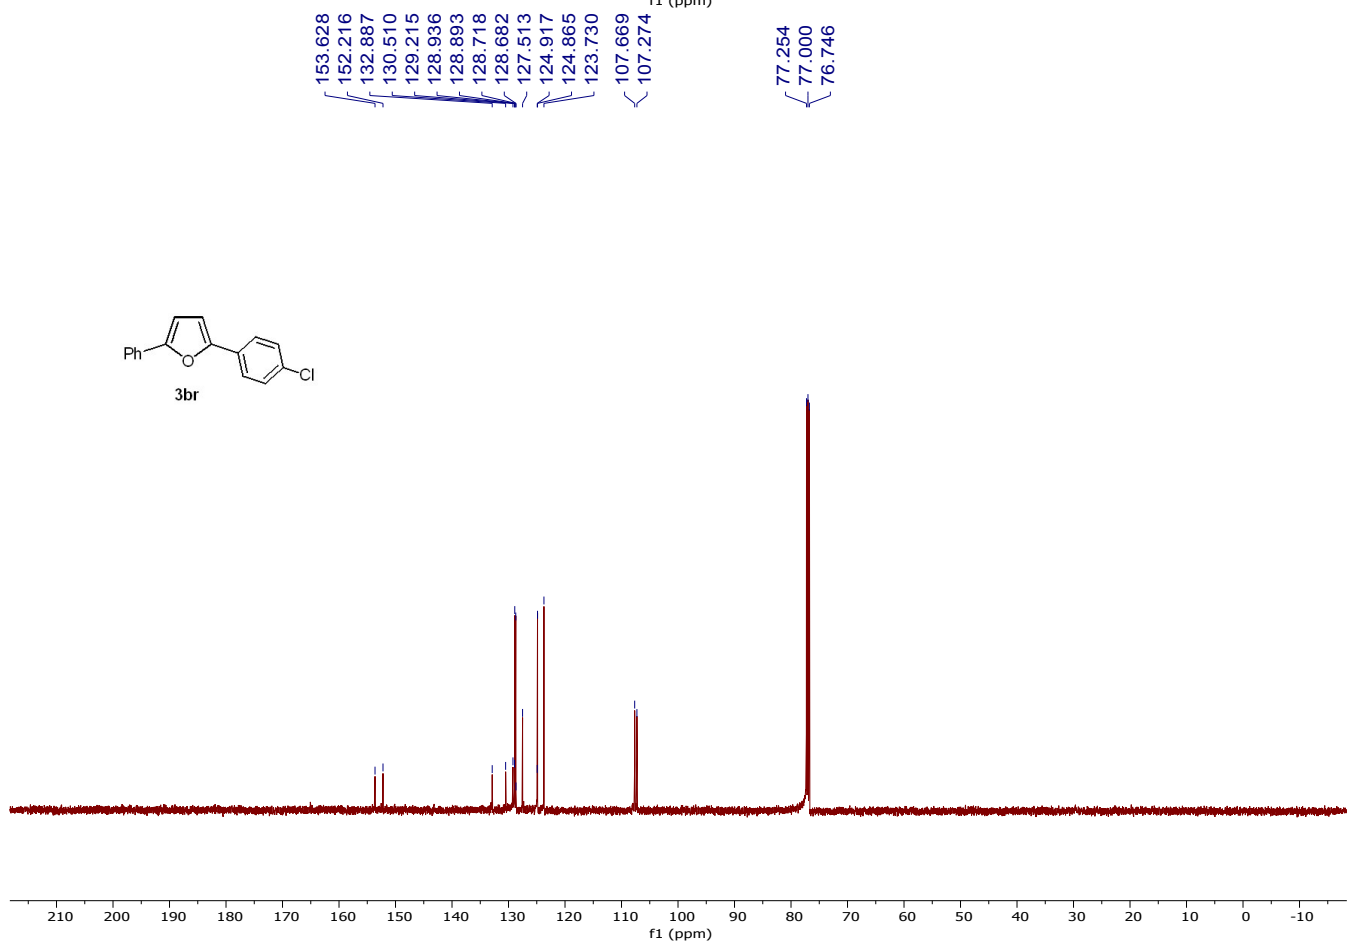

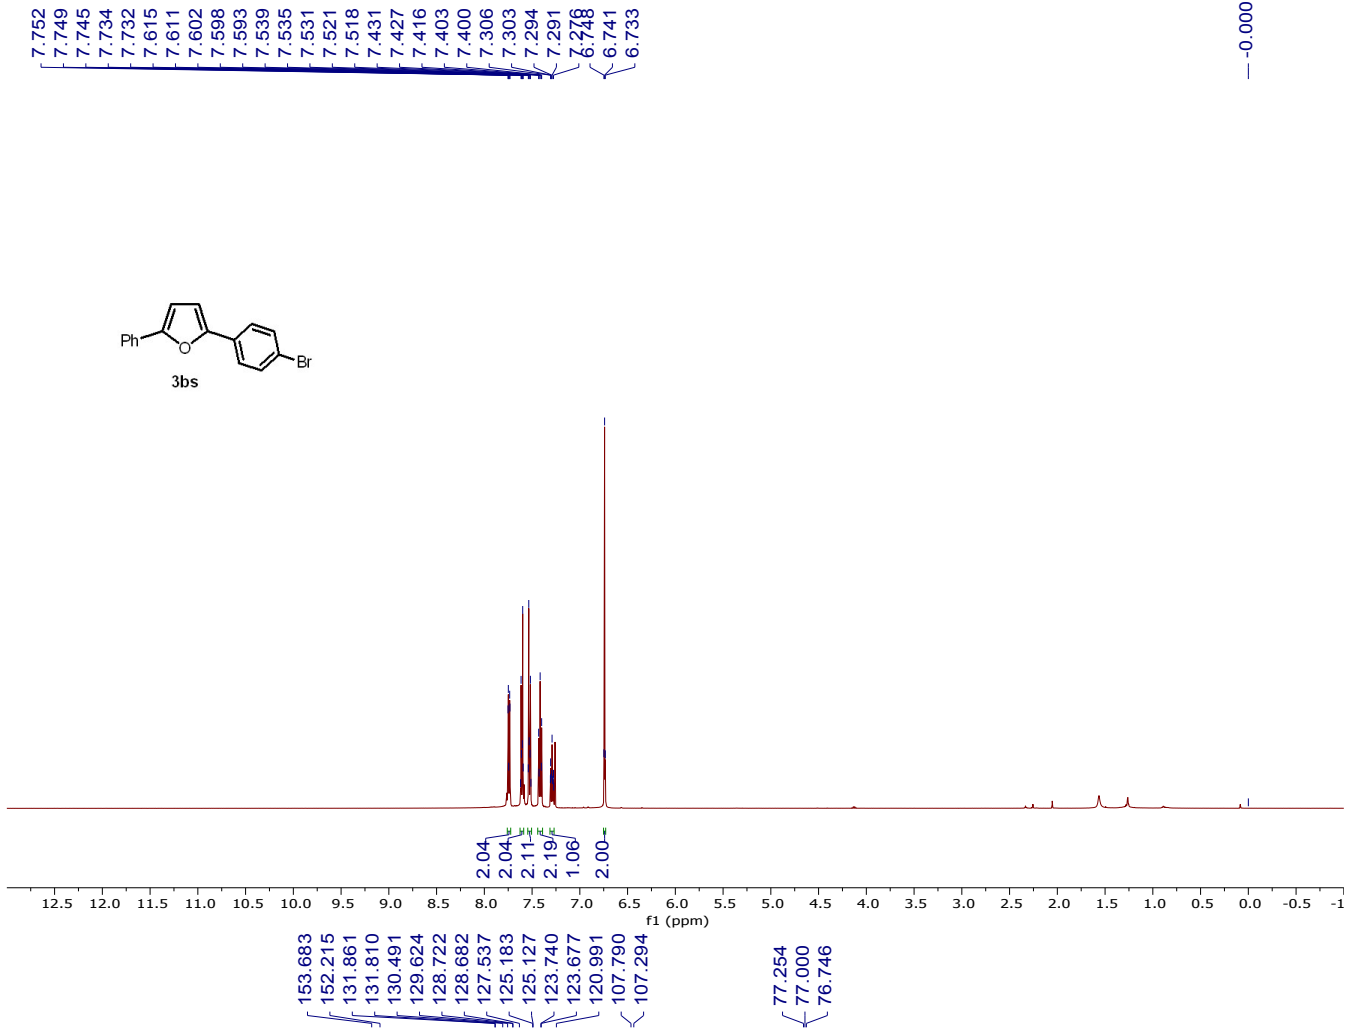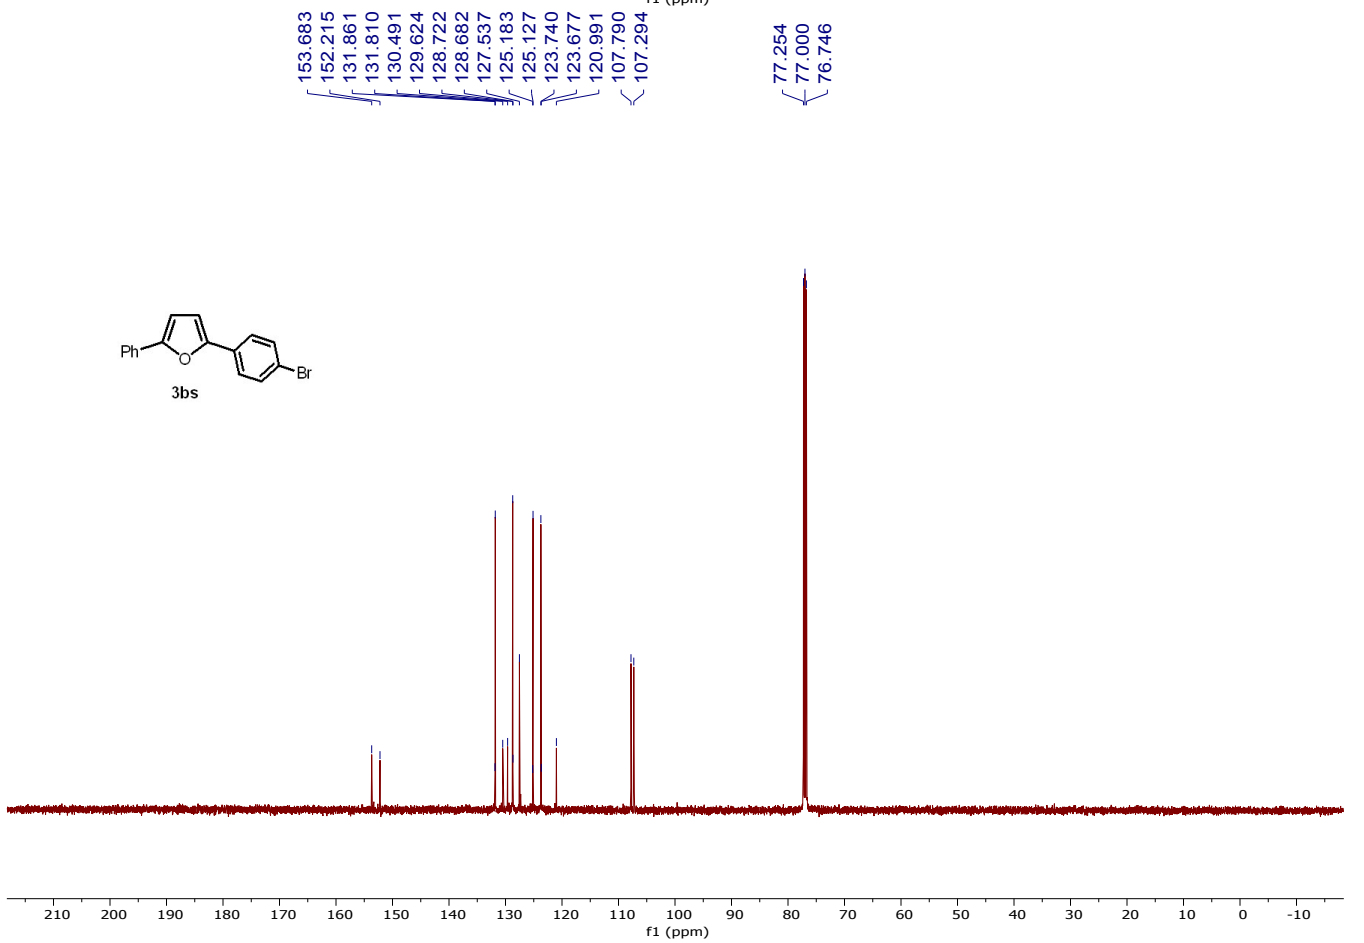



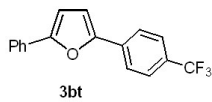

7.836  
7.820  
7.774  
7.771  
7.767  
7.757  
7.755  
7.659  
7.642  
7.448  
7.444  
7.433  
7.417  
7.330  
7.328  
7.325  
7.316  
7.313  
7.309  
7.301  
7.298  
7.296  
6.861  
6.854  
6.777  
6.770

— 0.000

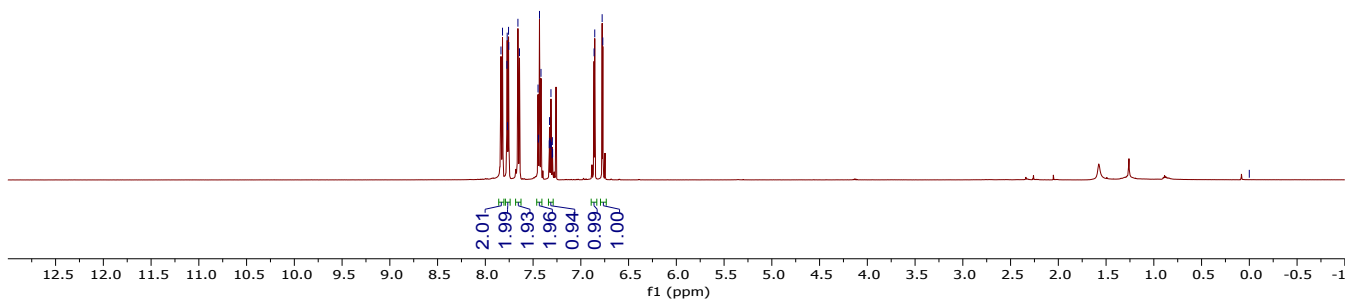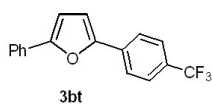

154.413  
 151.741  
 133.803  
 130.318  
 128.777  
 127.816  
 125.765  
 125.735  
 125.704  
 125.674  
 123.903  
 123.591  
 109.231  
 107.401  
 77.254  
 77.000  
 76.746

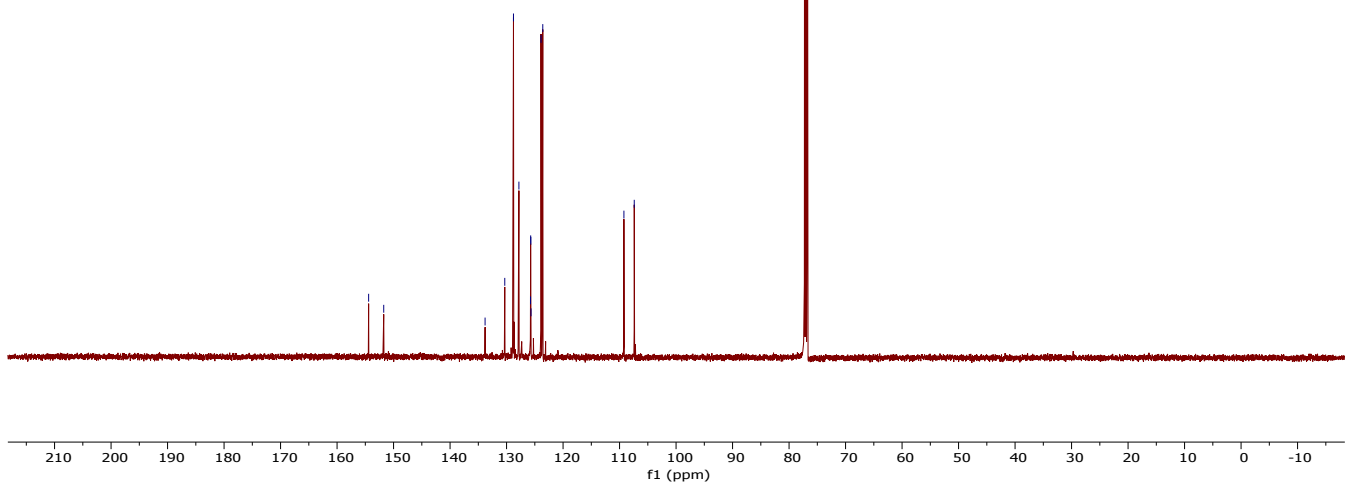

7.845  
7.840  
7.836  
7.827  
7.823  
7.793  
7.790  
7.776  
7.676  
7.671  
7.667  
7.662  
7.658  
7.655  
7.644  
7.487  
7.472  
7.456  
7.447  
7.432  
7.416  
7.387  
7.372  
7.310  
7.295  
6.788  
6.778  
6.771

0.000

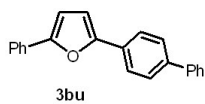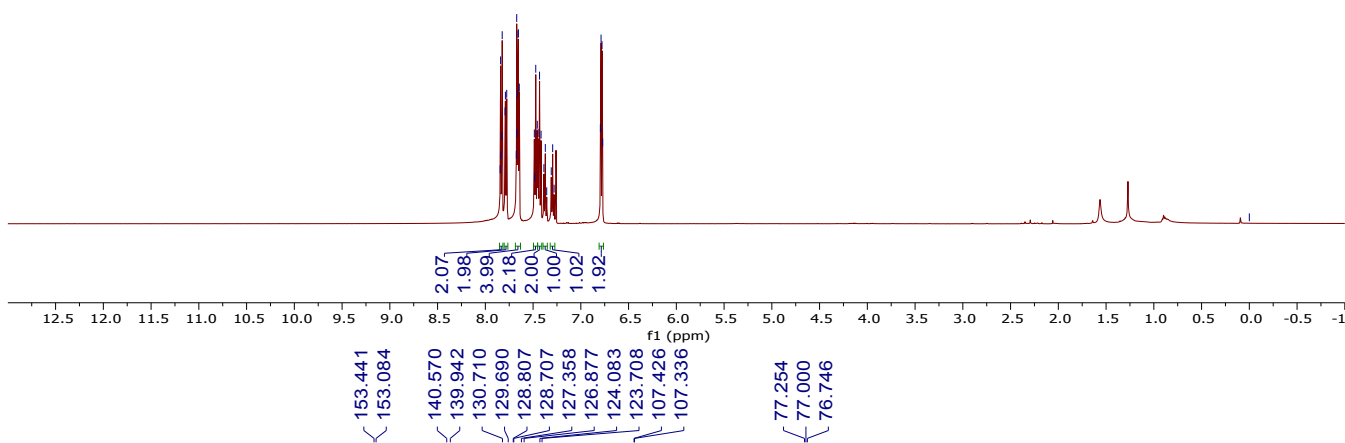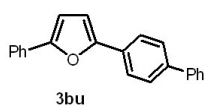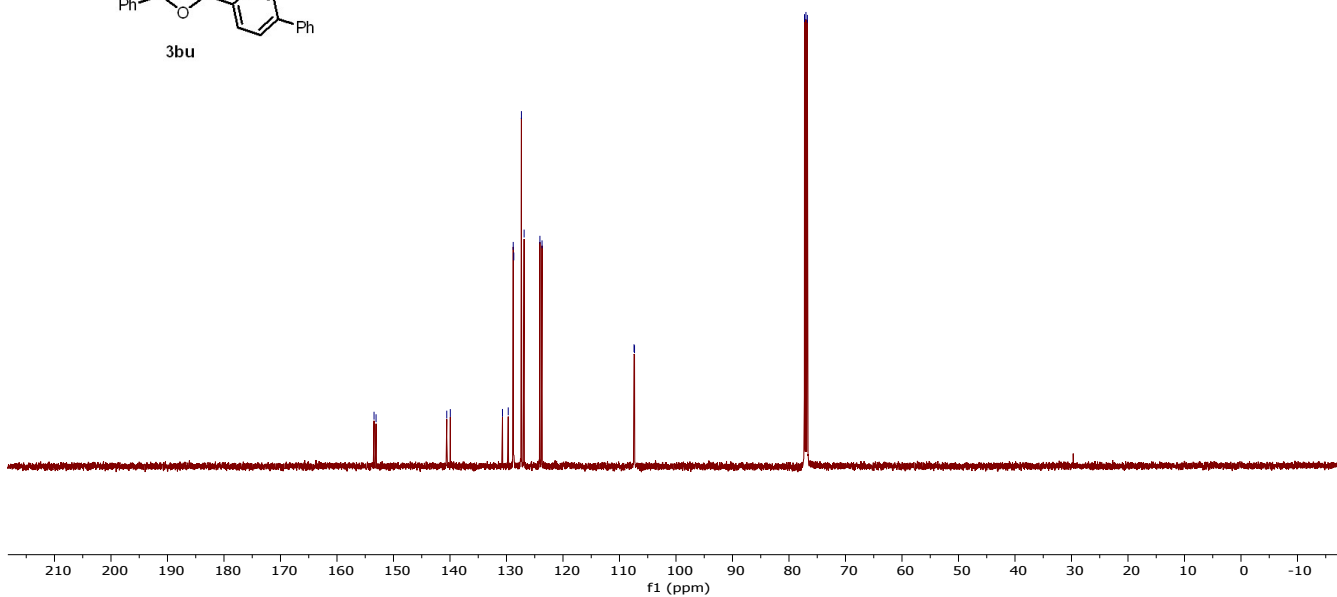

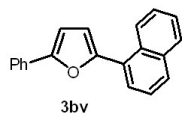

8.549  
 8.532  
 7.925  
 7.909  
 7.906  
 7.869  
 7.853  
 7.846  
 7.843  
 7.831  
 7.829  
 7.815  
 7.812  
 7.808  
 7.798  
 7.795  
 7.581  
 7.578  
 7.565  
 7.562  
 7.557  
 7.554  
 7.548  
 7.546  
 7.541  
 7.538  
 7.531  
 7.528  
 7.525  
 7.452  
 7.448  
 7.436  
 7.424  
 7.420  
 7.417  
 7.319  
 7.316  
 7.314  
 7.304  
 7.301  
 7.298  
 7.289  
 7.286  
 7.284  
 6.873  
 6.866  
 6.841  
 6.834  
 -0.000

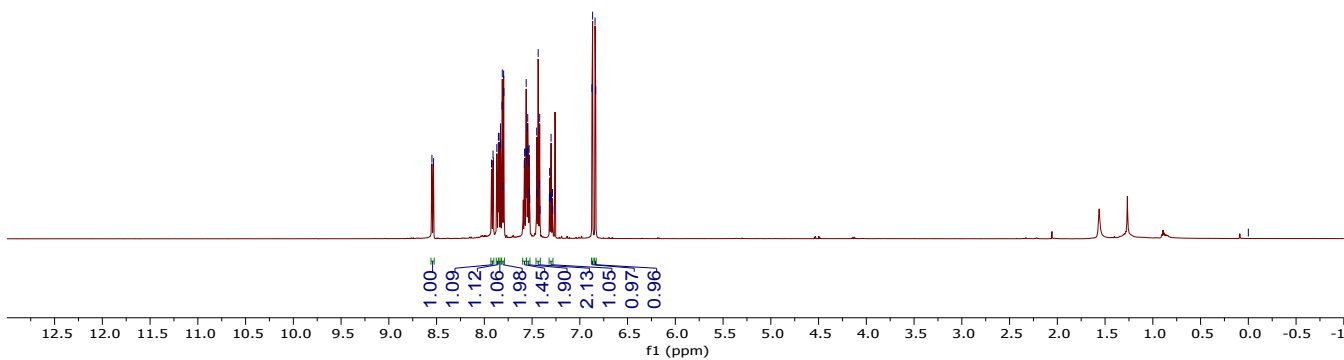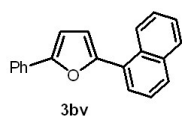

153.767  
 152.935  
 134.004  
 130.781  
 130.229  
 128.748  
 128.563  
 128.529  
 128.426  
 127.394  
 126.623  
 126.001  
 125.932  
 125.523  
 125.340  
 123.744  
 111.425  
 106.931  
 77.254  
 77.000  
 76.746

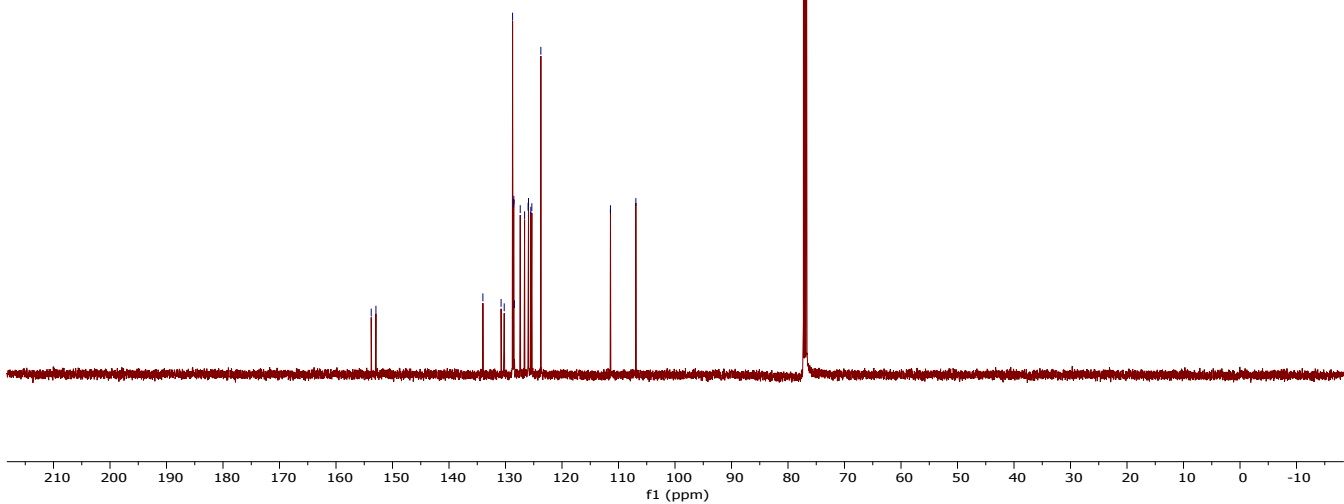

8.230  
7.915  
7.899  
7.879  
7.862  
7.847  
7.843  
7.839  
7.830  
7.827  
7.813  
7.810  
7.528  
7.525  
7.514  
7.511  
7.508  
7.498  
7.495  
7.484  
7.481  
7.470  
7.468  
7.465  
7.461  
7.454  
7.450  
7.437  
7.434  
7.325  
7.322  
7.320  
7.311  
7.308  
7.304  
7.295  
7.293  
7.290  
6.875  
6.868  
6.804  
6.797

— 0.000

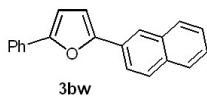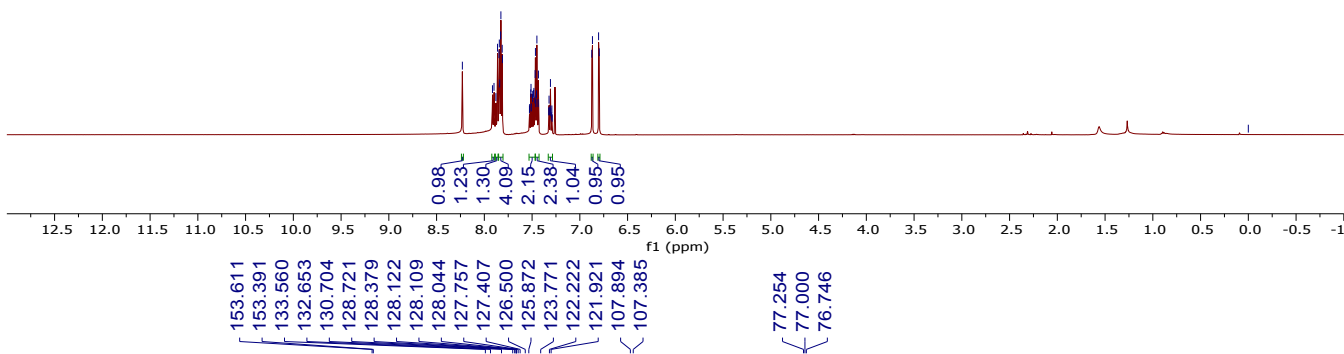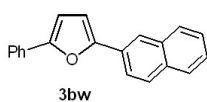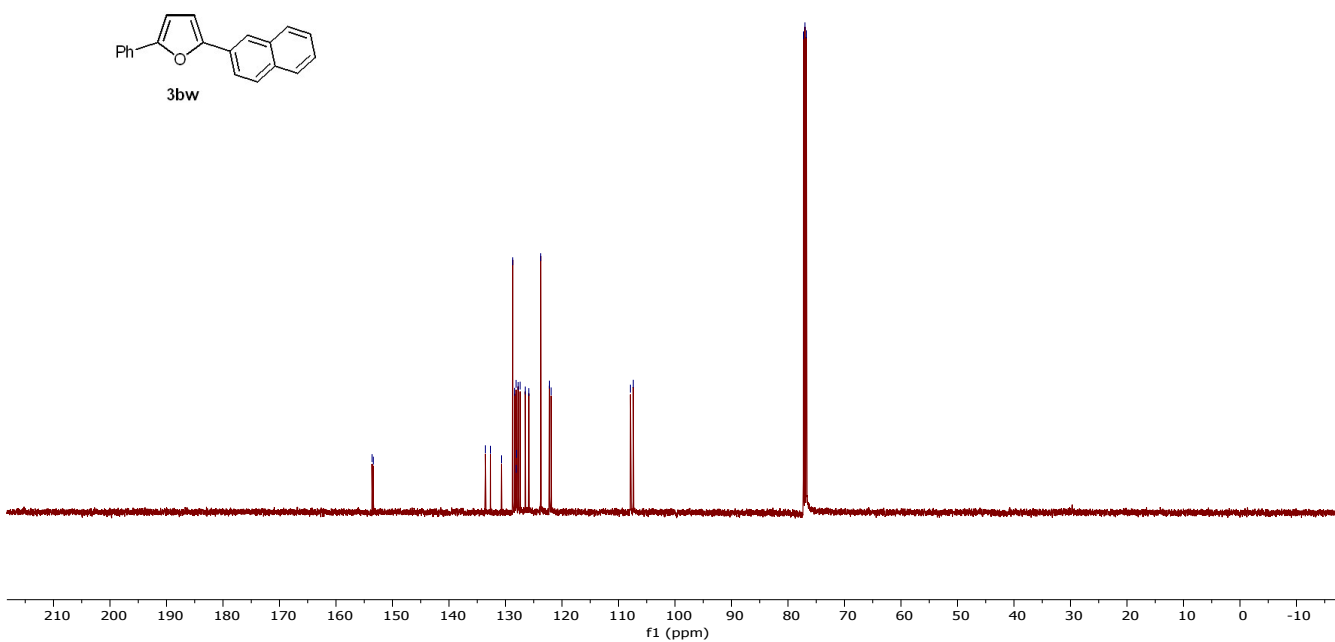

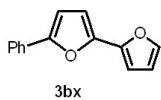

7.729  
 7.726  
 7.712  
 7.443  
 7.415  
 7.400  
 7.384  
 7.289  
 7.286  
 7.272  
 7.263  
 7.260  
 7.256  
 6.723  
 6.716  
 6.645  
 6.642  
 6.638  
 6.635  
 6.496  
 6.493  
 6.490  
 6.486

— 0.000

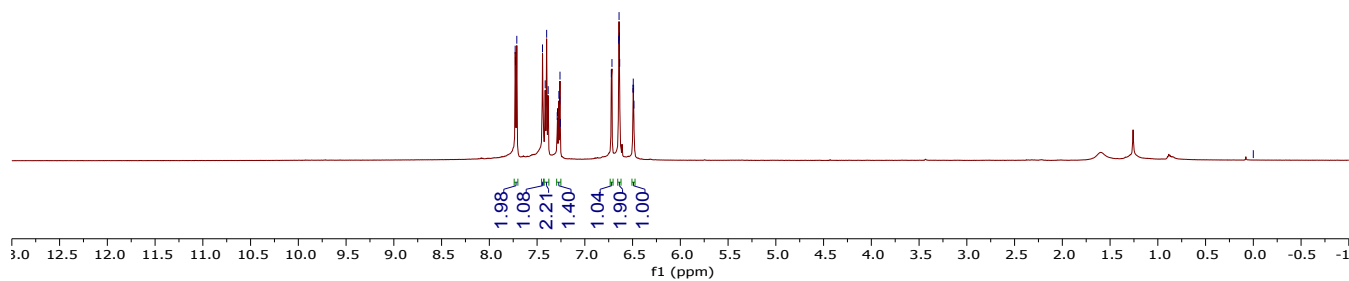

153.090  
 146.530  
 145.989  
 141.842  
 130.443  
 128.676  
 127.413  
 123.715  
 111.456  
 107.230  
 106.835  
 105.178  
 77.254  
 77.000  
 76.746

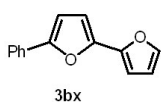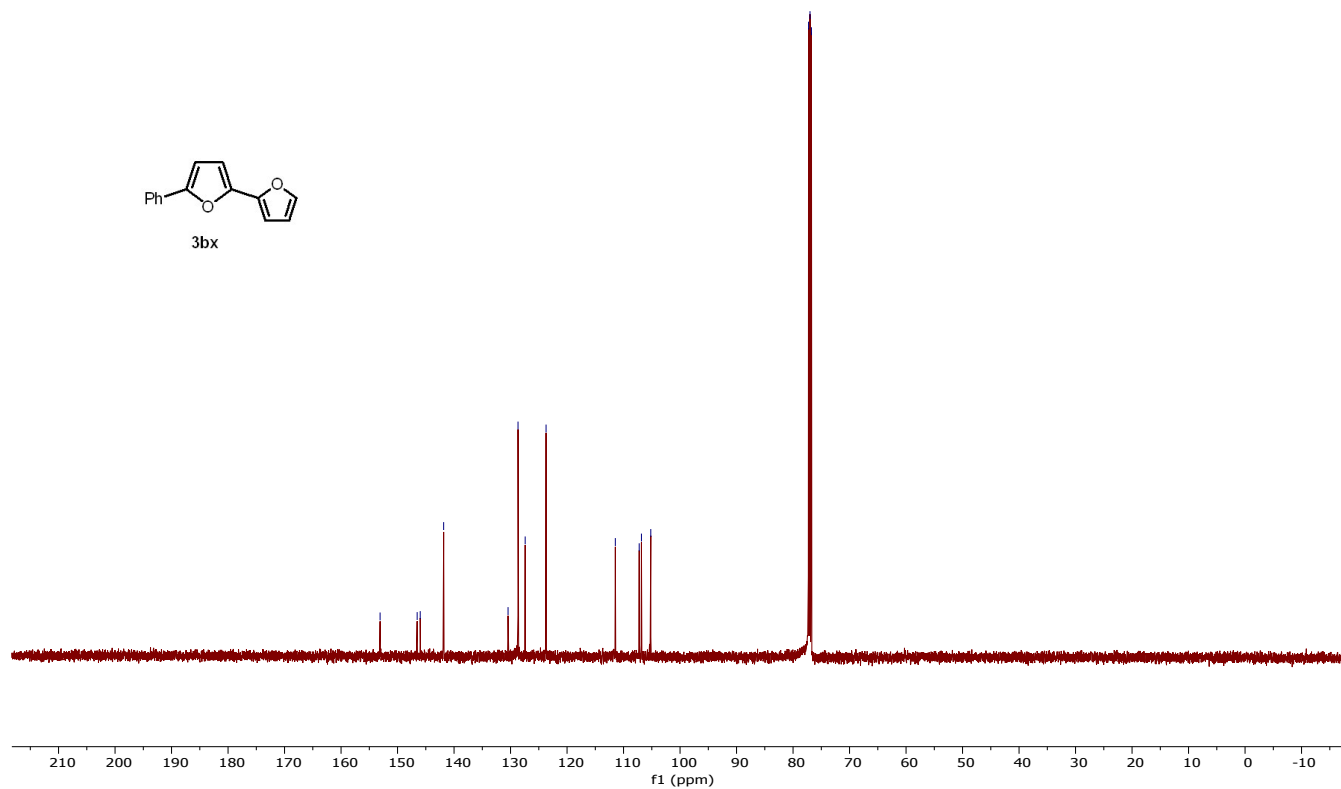

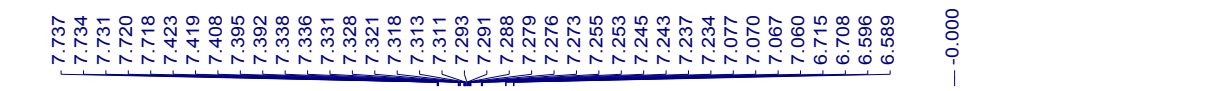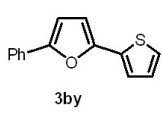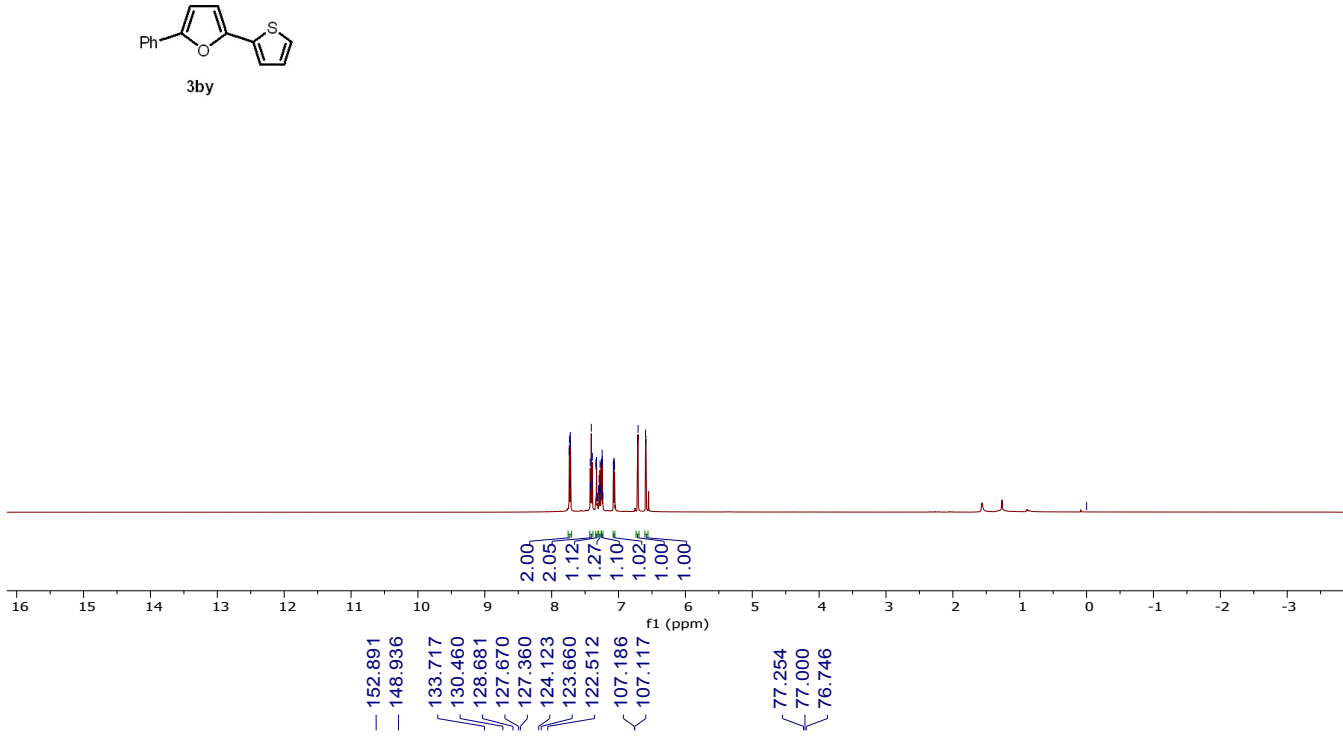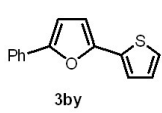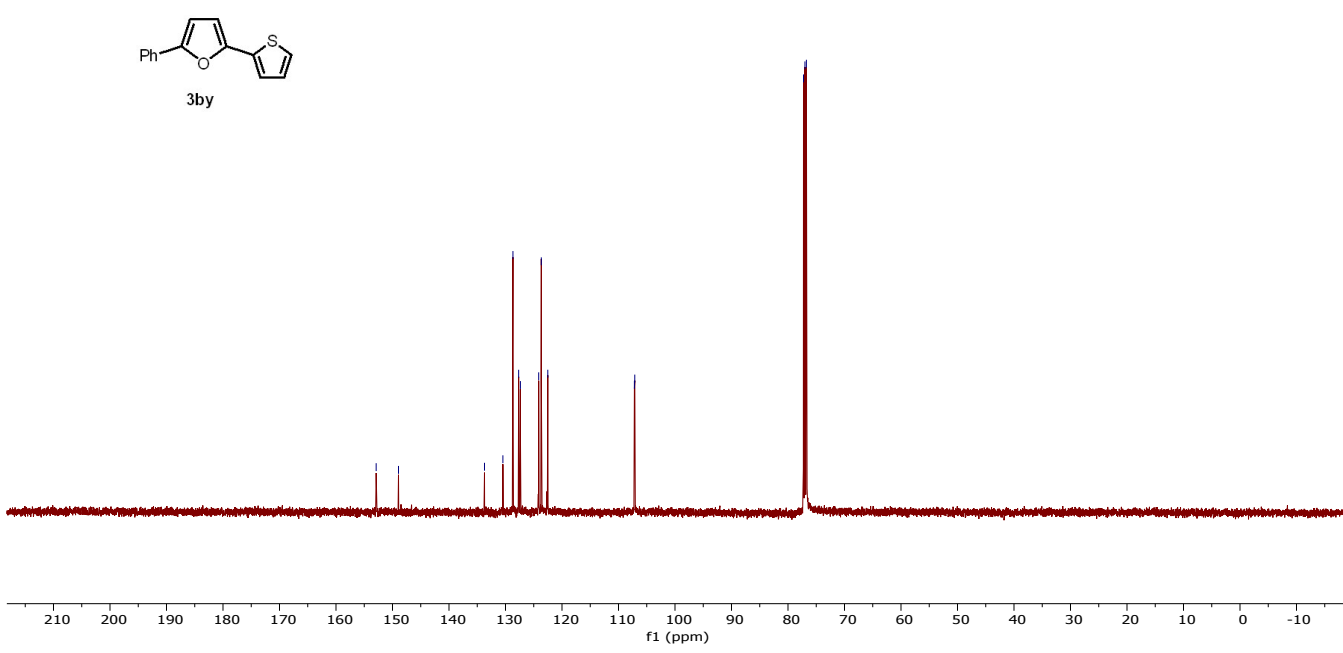

7.777  
7.774  
7.760  
7.758  
7.621  
7.617  
7.613  
7.606  
7.603  
7.601  
7.481  
7.478  
7.464  
7.462  
7.435  
7.419  
7.403  
7.389  
7.386  
7.374  
7.350  
7.346  
7.344  
7.337  
7.332  
7.327  
7.325  
7.321  
7.317  
7.311  
7.308  
7.295  
7.291  
7.278  
7.276  
7.273  
7.267  
7.265  
7.262  
7.258  
7.254  
7.250  
7.245  
7.238  
7.235  
7.233  
6.821

-0.000

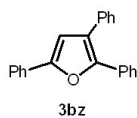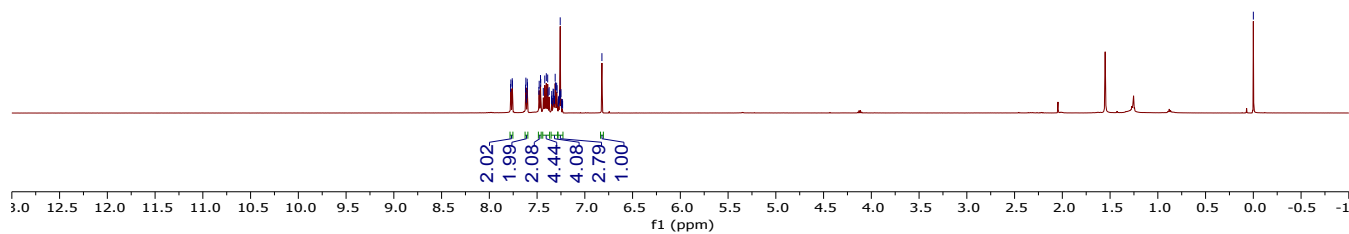

152.518  
147.860  
134.291  
131.080  
130.505  
128.725  
128.680  
128.660  
128.386  
127.511  
127.477  
127.287  
126.104  
124.497  
123.791  
109.443

77.254  
77.000  
76.746

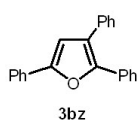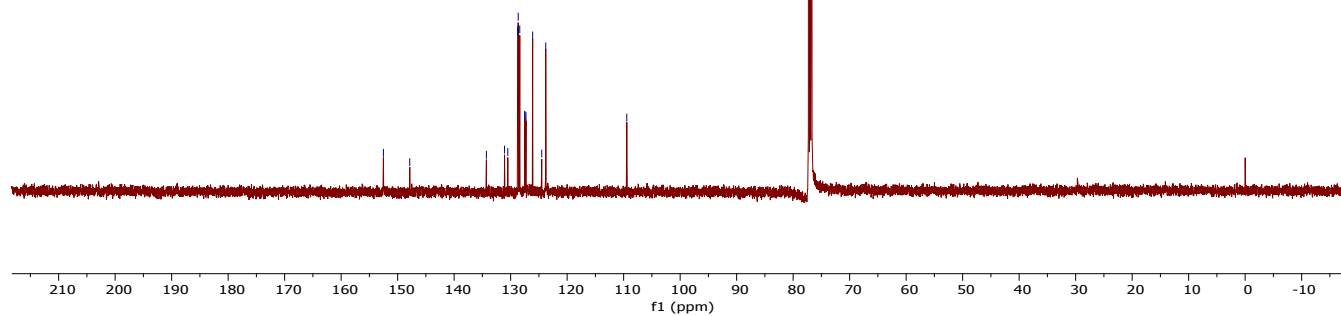

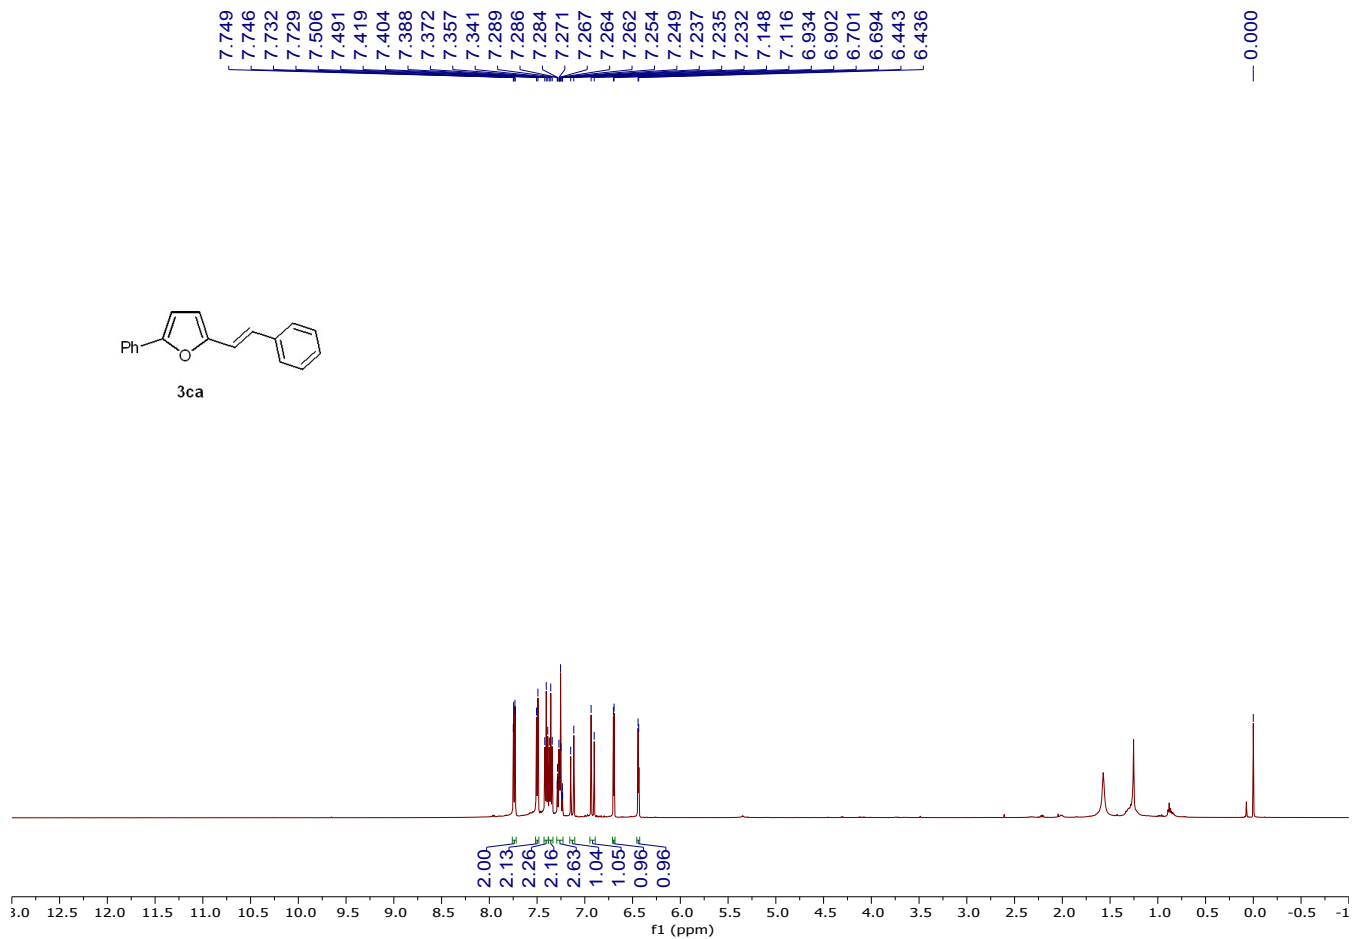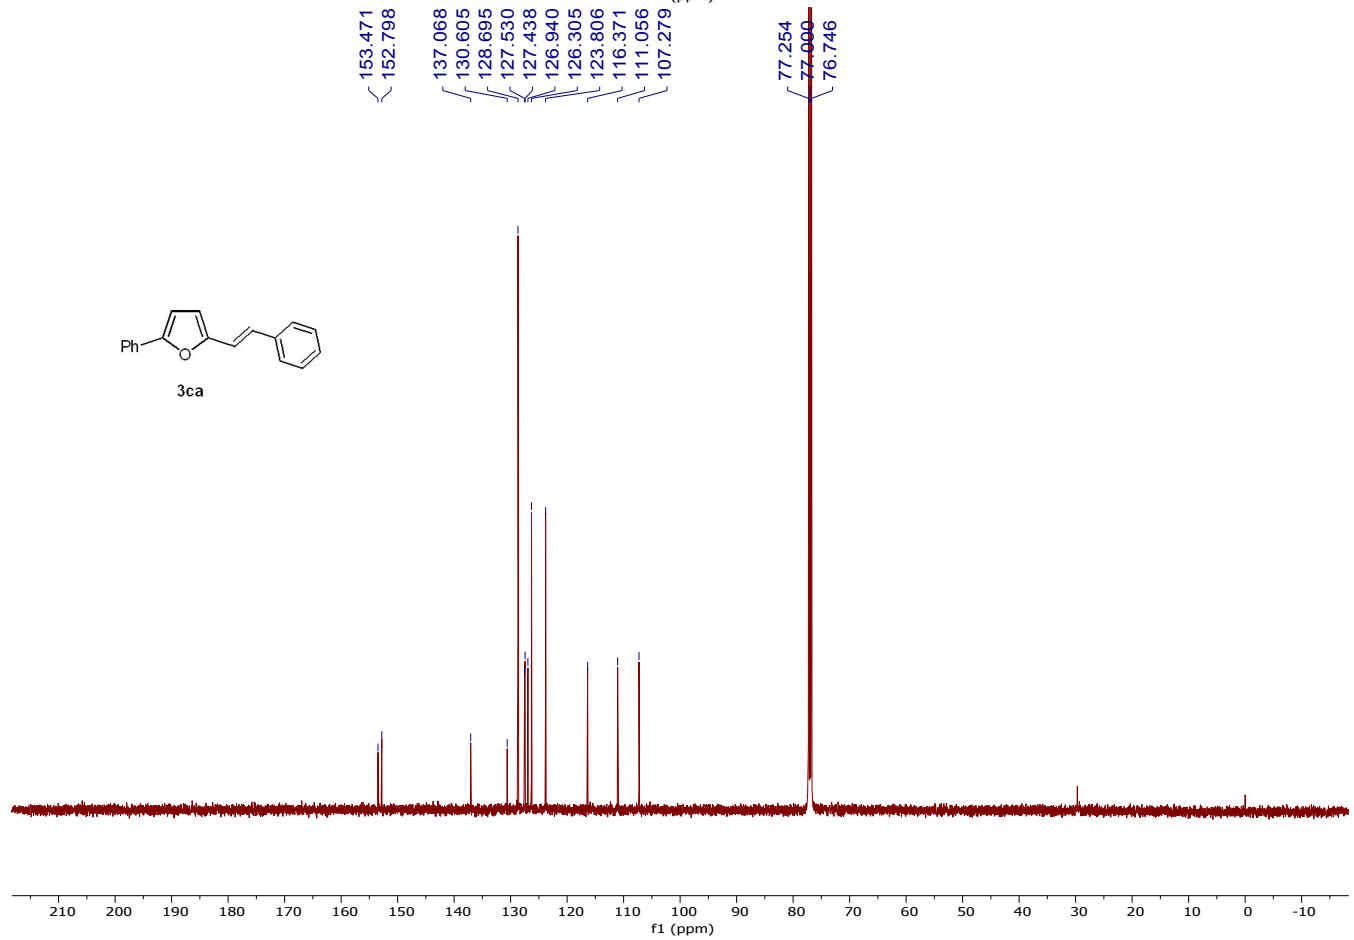



8.076  
8.061  
8.058  
8.033  
8.031  
8.020  
8.017  
8.014  
8.004  
8.001  
7.935  
7.932  
7.920  
7.916  
7.597  
7.593  
7.589  
7.585  
7.581  
7.578  
7.575  
7.570  
7.556  
7.553  
7.513  
7.497  
7.493  
7.489  
7.486  
7.482  
7.476  
7.472  
7.467  
7.461  
7.451  
7.449  
7.445  
7.038  
7.023  
7.008  
6.889  
6.872  
6.161  
6.153  
6.144  
6.135  
4.028  
4.011  
3.993  
3.976  
3.859  
3.809  
3.796  
3.471  
3.363  
3.354  
3.327  
3.319  
0.000

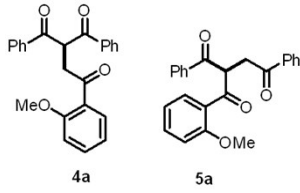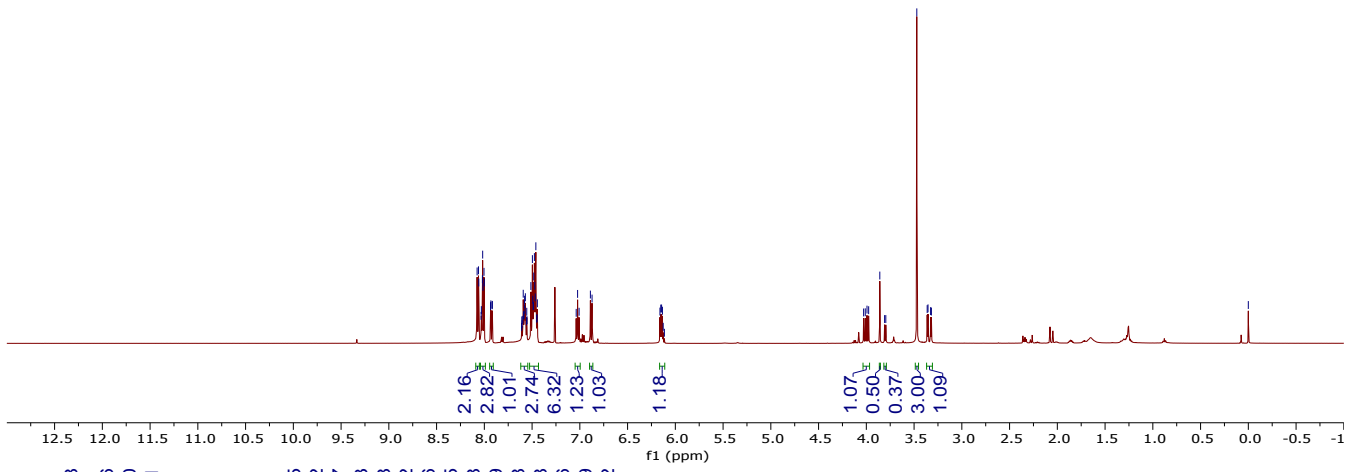

12.5 12.0 11.5 11.0 10.5 10.0 9.5 9.0 8.5 8.0 7.5 7.0 6.5 6.0 5.5 5.0 4.5 4.0 3.5 3.0 2.5 2.0 1.5 1.0 0.5 0.0 -0.5 -1

f1 (ppm)

206.408  
196.976  
196.840  
195.231

158.575  
136.282  
135.617  
134.563  
133.348  
133.242  
131.546  
128.855  
128.768  
128.639  
128.578  
128.248  
125.566  
121.009  
111.422

77.254  
77.000  
76.746

55.616  
54.939

37.379

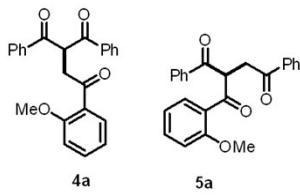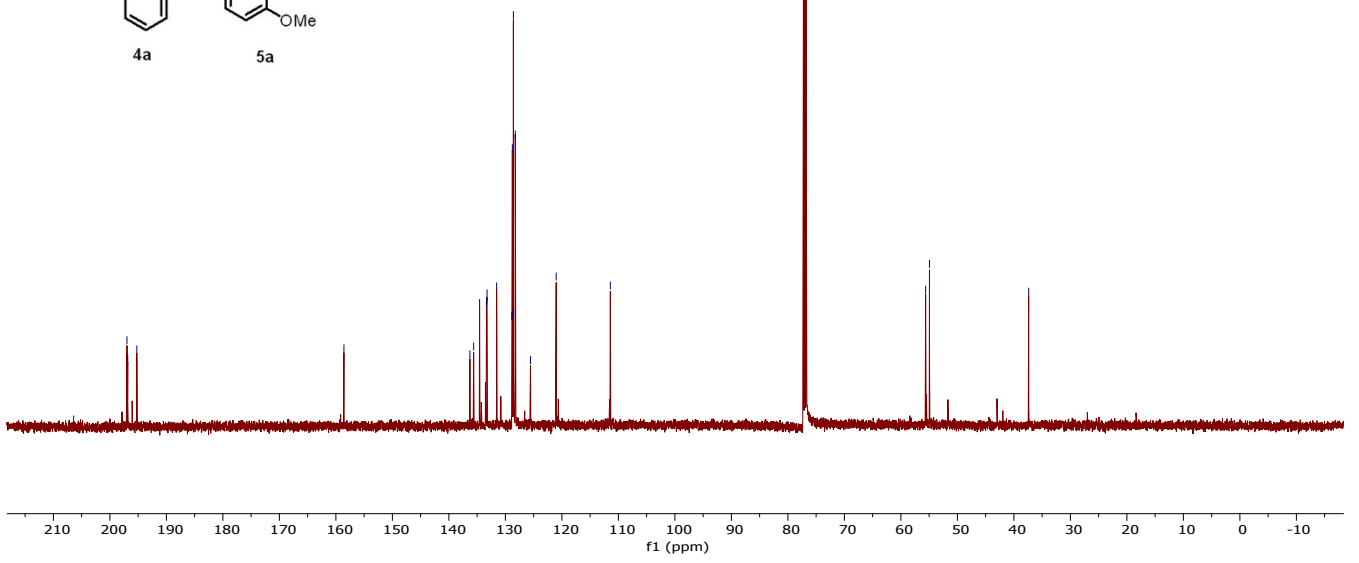

210 200 190 180 170 160 150 140 130 120 110 100 90 80 70 60 50 40 30 20 10 0 -10

f1 (ppm)

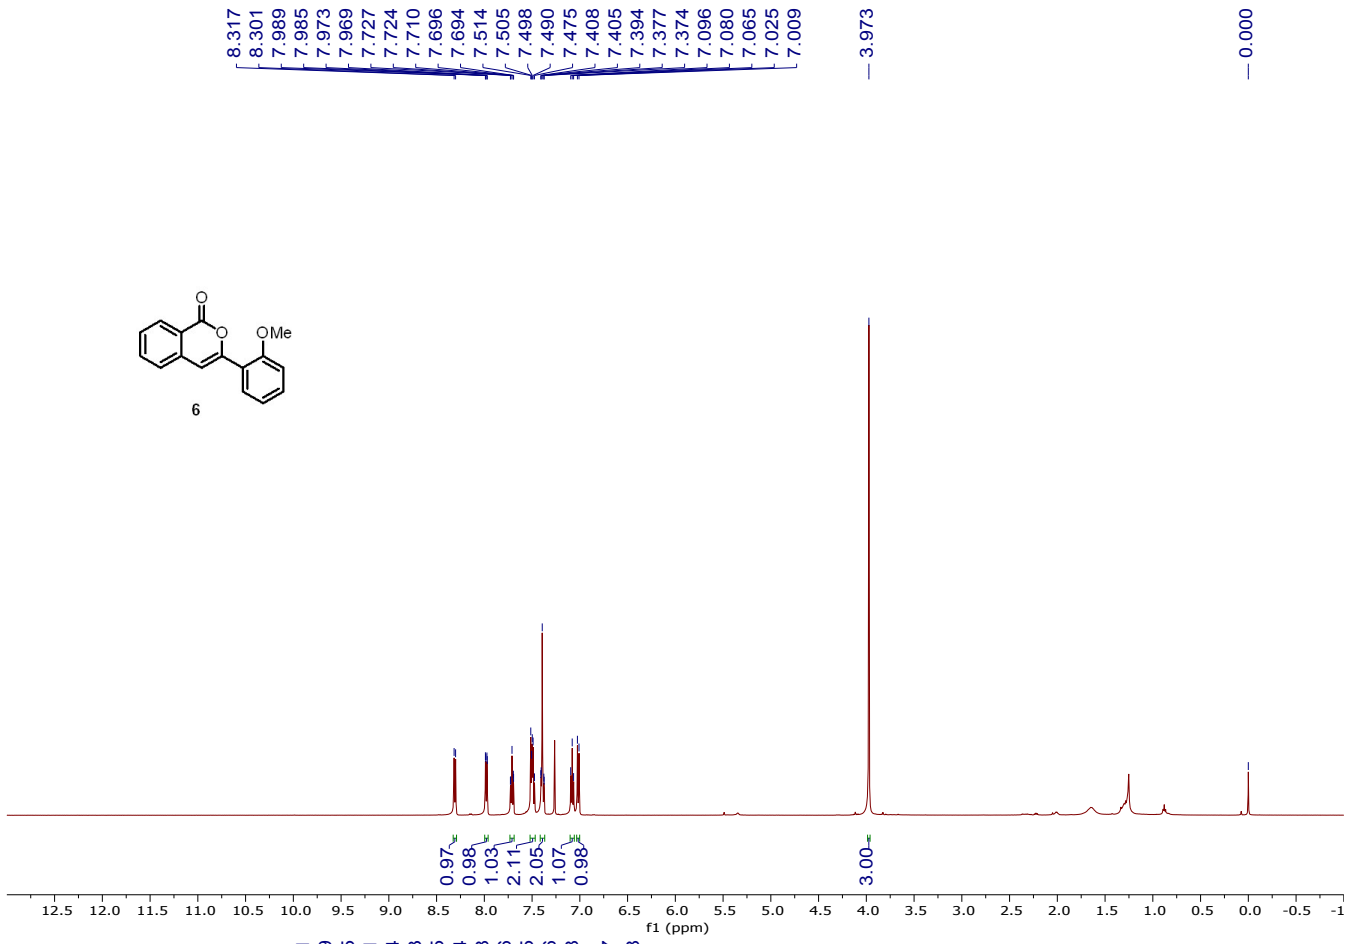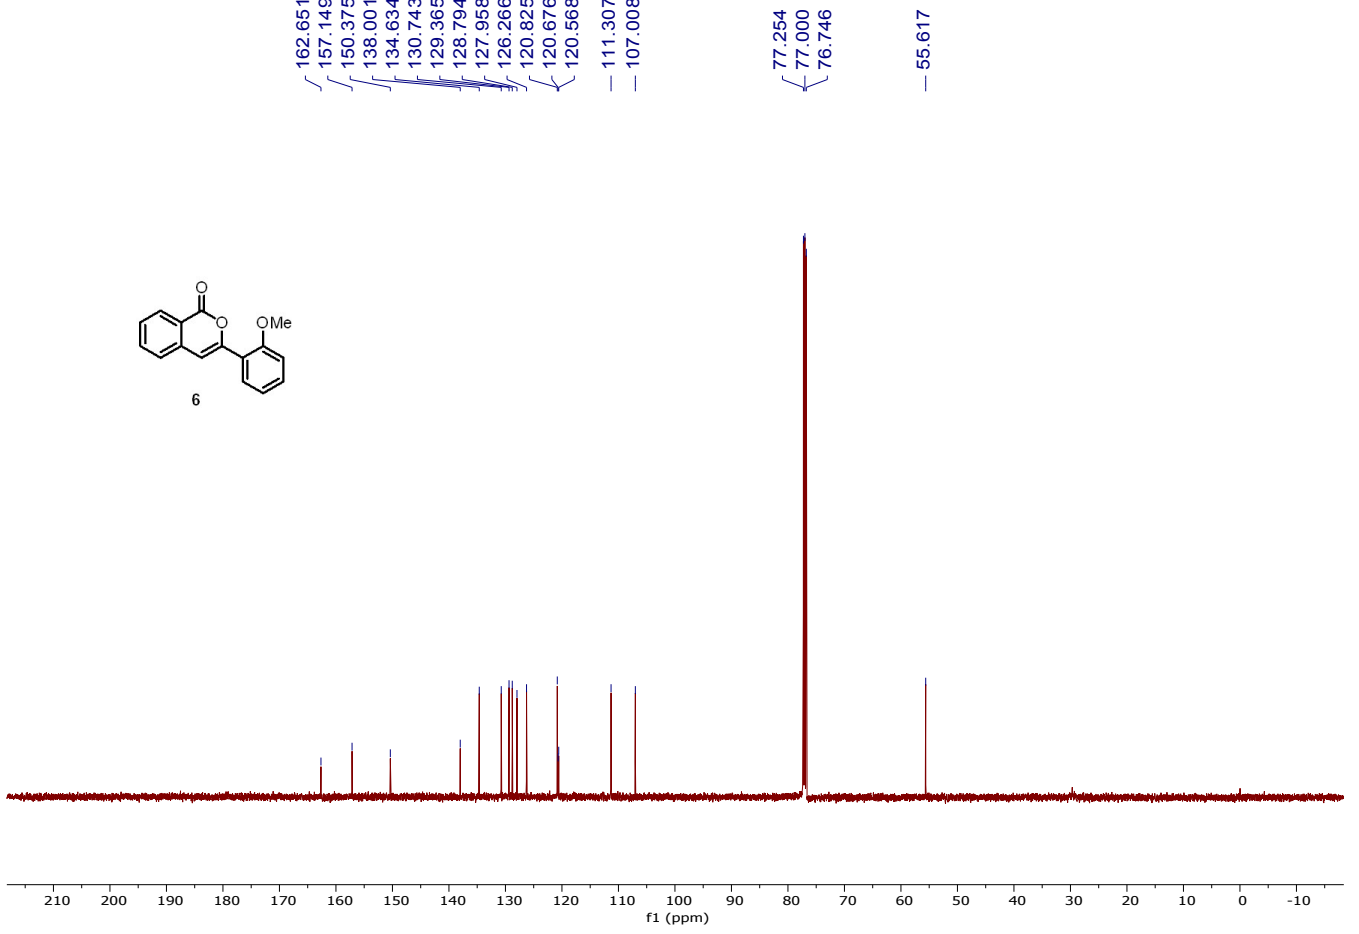

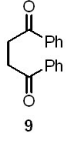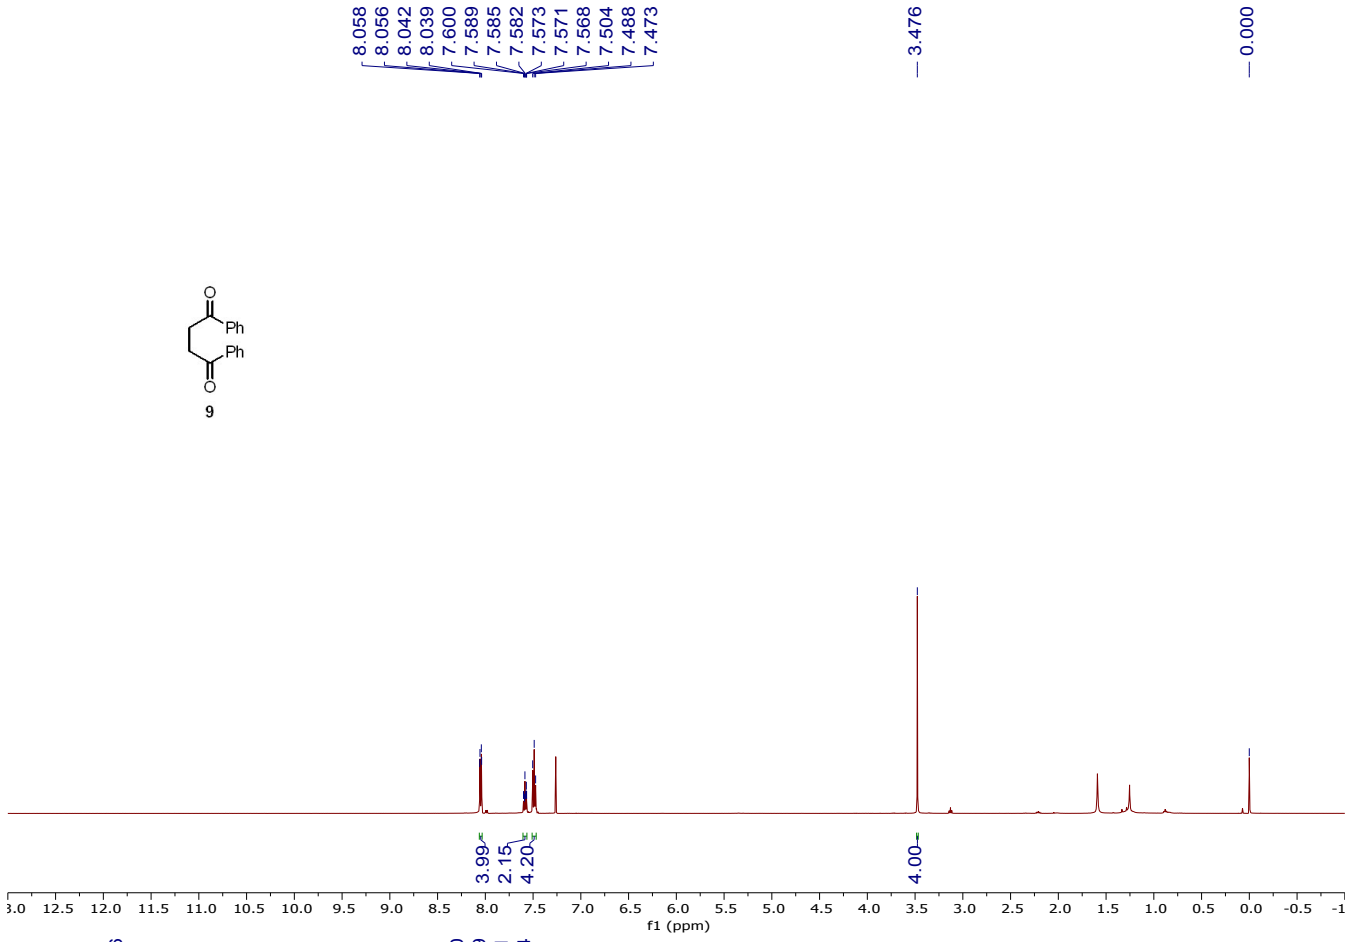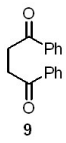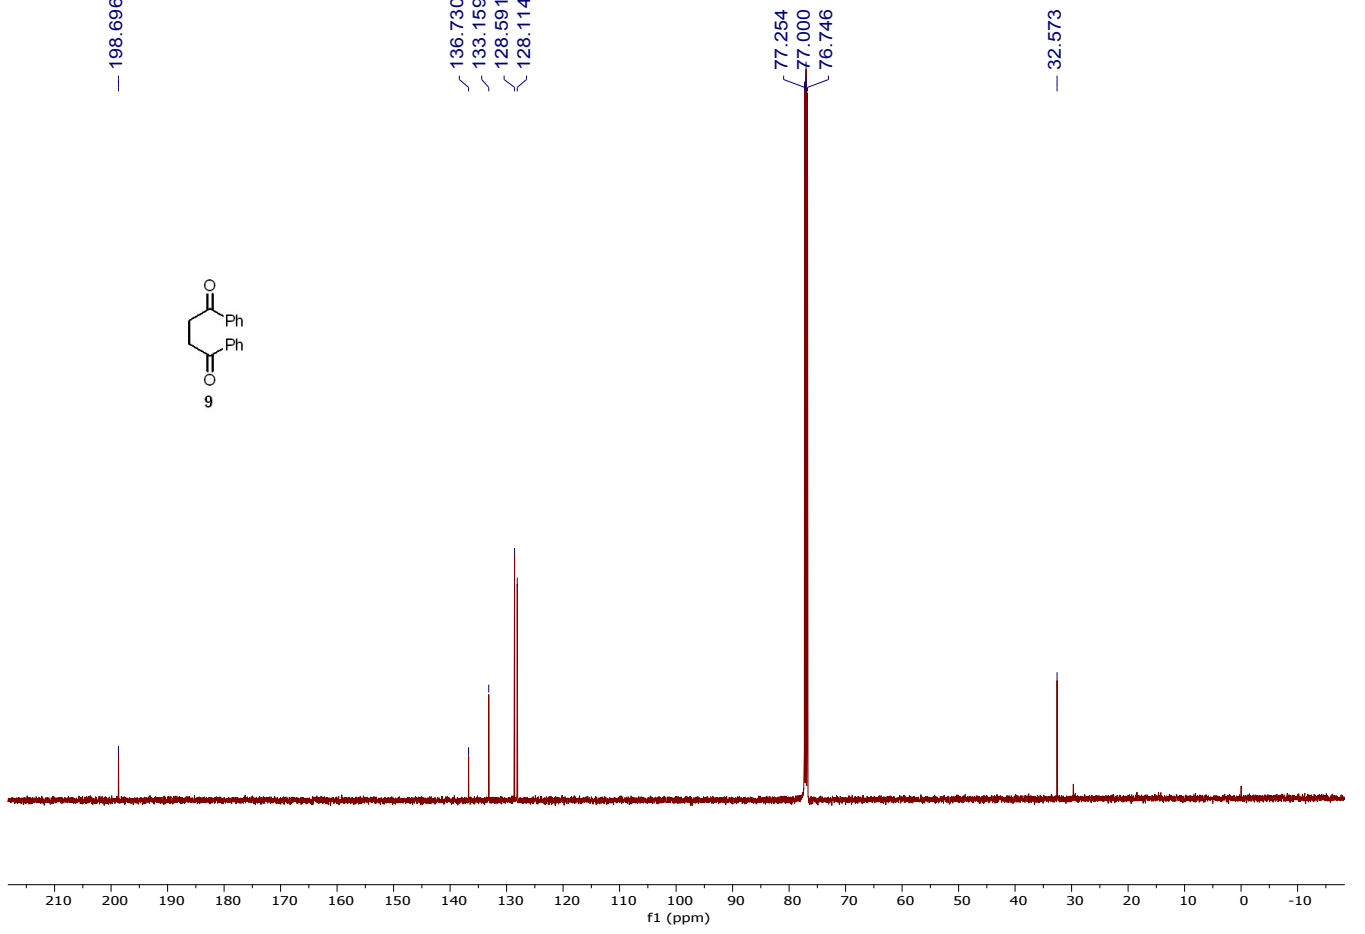

Supplement: SC-010-C9SC03245B-s001.pdf [file SC-010-C9SC03245B-s001.pdf]
